# Supplementary material for: A novel polymer containing phosphorus–nitrogen ligands for stabilization of palladium nanoparticles: an efficient and recyclable catalyst for Suzuki and Sonogashira reactions in neat water
Source: Royal Society of Chemistry journal article supplement (doi:10.1039/c5dt01642h), 2015-01-01
Supplement: c5dt01642h1.pdf [file c5dt01642h1.pdf]

**Supporting Information**

**Novel Polymer Containing Phosphorus-Nitrogen Ligands for Stabilization  
of Palladium Nanoparticles: Efficient and Recyclable Catalyst for Suzuki  
and Sonogashira Reactions in Neat Water**

M. Gholinejad,<sup>\*a</sup> F. Hamed,<sup>a</sup> P. Biji<sup>b</sup>

<sup>a</sup>Department of Chemistry, Institute for Advanced Studies in Basic Sciences (IASBS), P. O.  
Box 45195-1159, Gavazang, Zanjan 45137-6731, Iran.

<sup>b</sup>Nanotech Research, Innovation and Incubation Center, PSG Institute of Advanced Studies,  
Coimbatore-641 004, India.

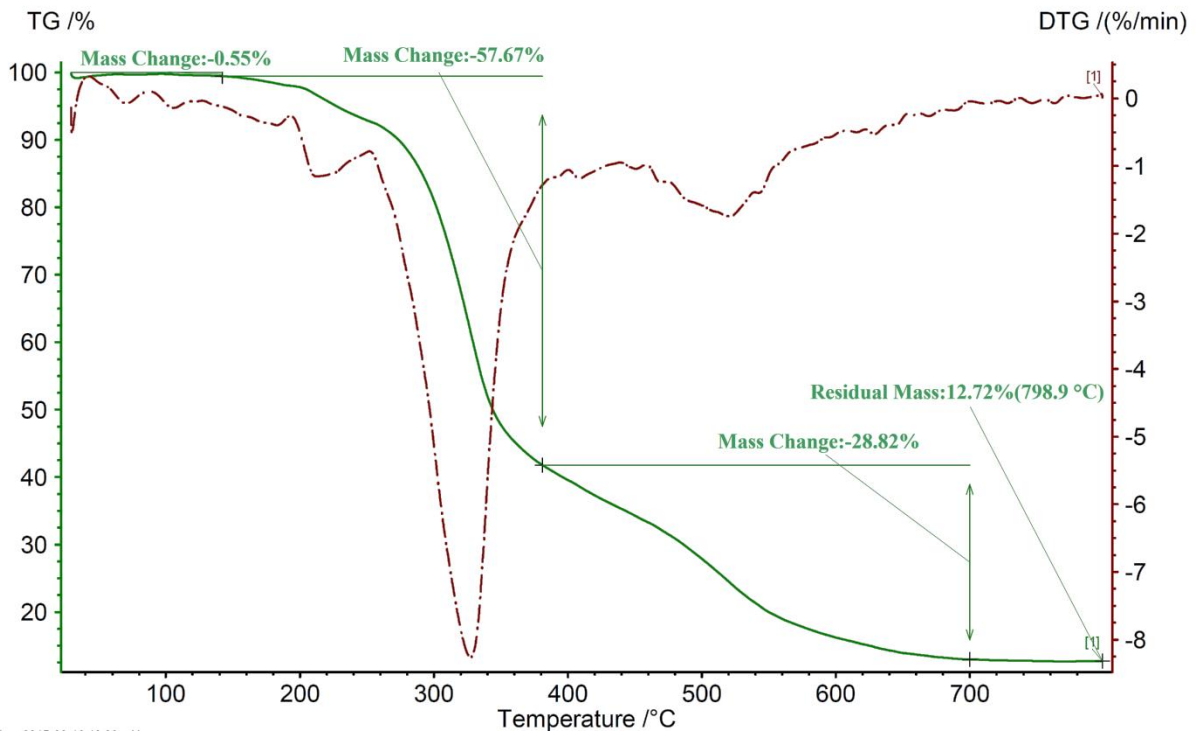

**Figure 1.** Thermogravimetric diagram of the polymer (3)

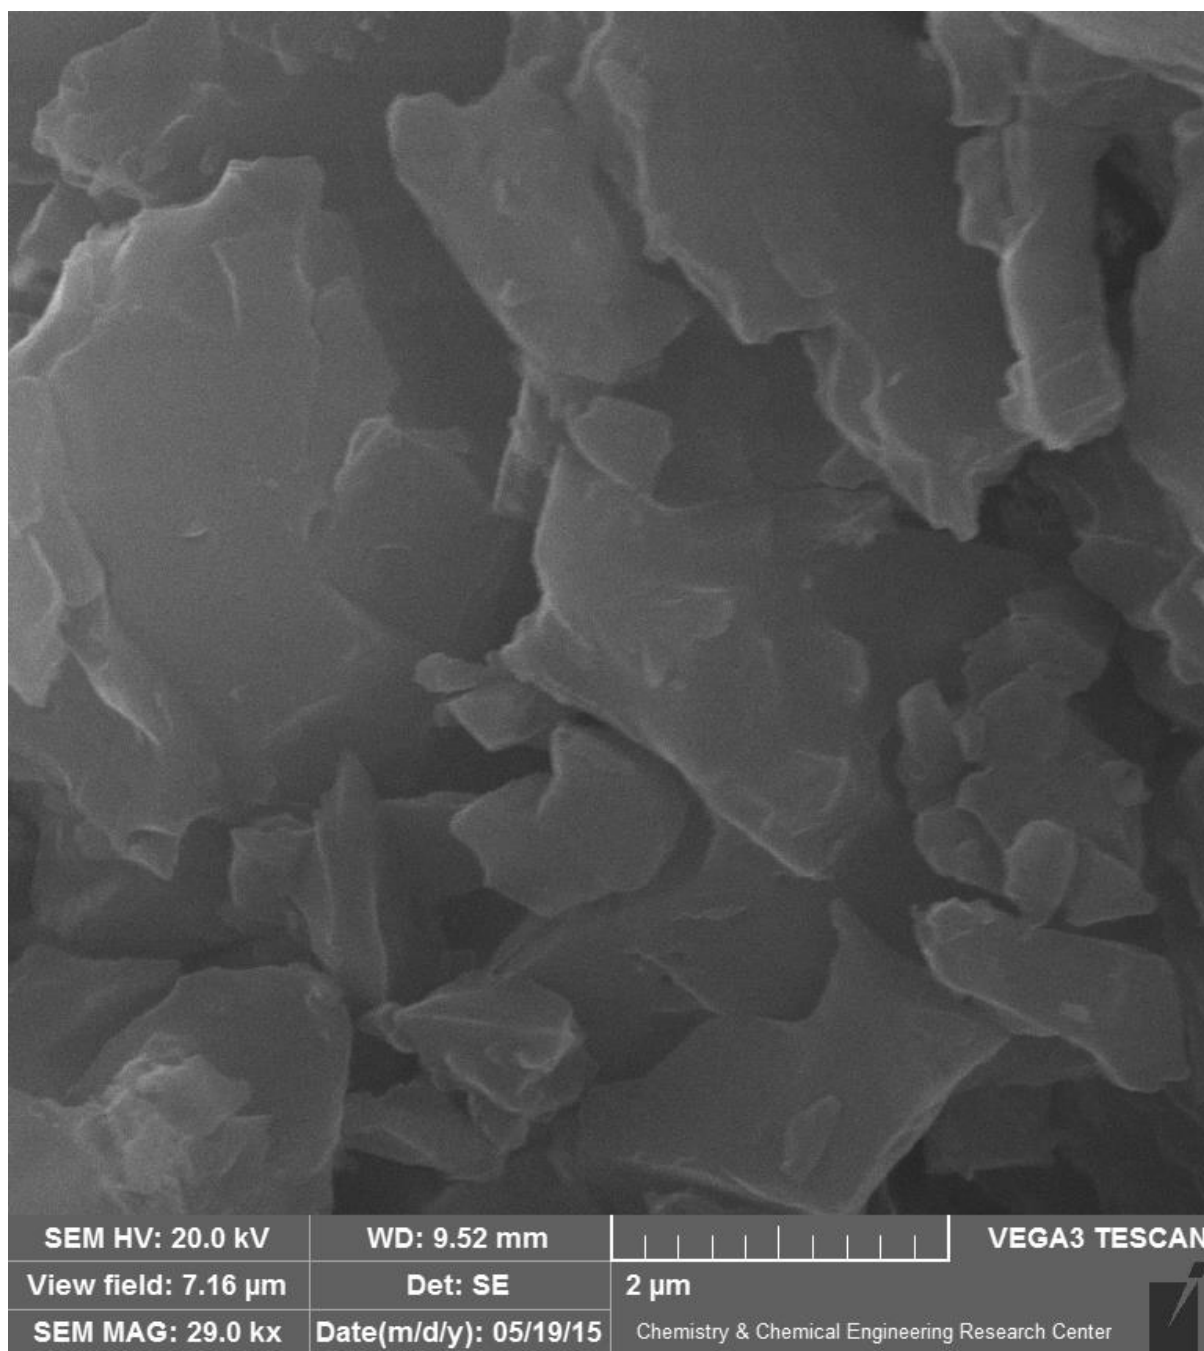

**Figure 2.** SEM image of the catalyst

**N-(2-hydroxyphenyl)acrylamide:**

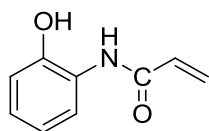

<sup>1</sup>H NMR (400 MHz, CDCl<sub>3</sub>) δ(ppm): 8.95 (s, 1H), 7.78 (s, 1H), 7.19-7.13 (m, 2H), 7.06 (d, *J*=8, 1H), 6.93-6.87 (m, 1H), 6.54 (d, *J*=16.4, 1H), 6.41-6.34 (dd, *J*= 16.8, *J*= 10.4, 1H), 5.89 (d, *J*=10.8, 1H); <sup>13</sup>C NMR (100 MHz, CDCl<sub>3</sub>) δ (ppm): 165.00, 148.82, 129.78, 129.40, 127.45, 125.33, 122.31, 120.56, 119.84; FT-IR (KBr): 3467, 3406, 3291, 2920, 2855, 2722, 1659, 1451, 1408, 1355, 1252, 1097, 799, 751, 611.

**N-(2-((diphenylphosphino)oxy)phenyl)acrylamide:**

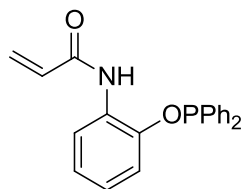

<sup>1</sup>H NMR (400 MHz, CDCl<sub>3</sub>) δ (ppm): 10.07 (s, 1H), 7.83-7.45 (m, 5H), 7.62-7.59 (m, 3H), 7.55-7.53 (m, 5H), 7.31 (s, 1H), 7.12-7.08 (m, 1H), 7.06-7.01 (m, 1H), 6.83-6.80 (m, 1H); <sup>13</sup>C NMR (100 MHz, CDCl<sub>3</sub>) δ (ppm): 170.88, 170.74, 148.44, 132.47, 131.63, 130.74, 130.64, 129.14, 129.02, 126.21, 122.35, 119.87, 118.50; <sup>31</sup>P NMR: 36.97; FT-IR (KBr): 3411, 3312, 1533, 1450, 1158, 1116, 748, 705, 538.

**1,1'-biphenyl:**

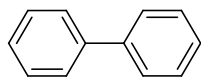

<sup>1</sup>H NMR (400 MHz, CDCl<sub>3</sub>) δ (ppm): 7.64 (d, *J*=7.6, 4H), 7.50-7.46 (m, 4H), 7.41-7.37 (m, 2H); <sup>13</sup>C NMR (100 MHz, CDCl<sub>3</sub>) δ (ppm): 141.26, 128.78, 127.28, 127.20; FT-IR (KBr): 3439, 2957, 2918, 2855, 1260, 1090, 1024, 803.

**4-Nitro-1,1'-biphenyl:**

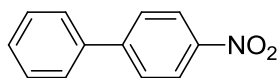



$^1\text{H}$  NMR (400 MHz,  $\text{CDCl}_3$ )  $\delta$ (ppm): 8.34 (d,  $J= 8.8$ , 2H), 7.78 (d,  $J= 8.8$ , 2H), 7.66 (d,  $J= 7.6$ , 2H), 7.56-7.46 (m, 3H);  $^{13}\text{C}$  NMR (100 MHz,  $\text{CDCl}_3$ )  $\delta$  (ppm): 147.66, 147.10, 138.80, 129.19, 128.95, 127.84, 127.42, 124.15; FT-IR (KBr): 2957, 2920, 2855, 1345, 1262, 1096, 1024, 852, 805, 737, 692.

### 2-phenylthiophene:

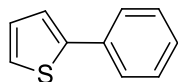

$^1\text{H}$  NMR (400 MHz,  $\text{CDCl}_3$ )  $\delta$ (ppm): 7.66 (d,  $J= 1.2$ , 2H), 7.64-7.35 (m, 2H), 7.34-7.31 (m, 3H), 7.13-7.11 (m, 1H);  $^{13}\text{C}$  NMR (100 MHz,  $\text{CDCl}_3$ )  $\delta$  (ppm): 144.45, 134.42, 128.91, 128.03, 127.49, 125.98, 124.83, 123.10; FT-IR (KBr): 3580, 3428, 2957, 2918, 797, 597, 502, 461, 440.

### [1,1'-biphenyl]-4-carbonitrile:

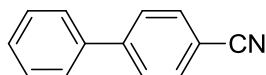

$^1\text{H}$  NMR (400 MHz,  $\text{CDCl}_3$ )  $\delta$ (ppm): 7.77-7.71 (m, 4H), 7.63 (m, 2H), 7.54-7.44 (m, 2H), 7.29 (s, 1H);  $^{13}\text{C}$  NMR (100 MHz,  $\text{CDCl}_3$ )  $\delta$  (ppm): 145.70, 139.20, 132.64, 129.15, 128.70, 127.77, 127.27, 119.00, 110.93; FT-IR (KBr): 2922, 2856, 2216, 1593, 1473, 1398, 842, 767, 692, 558, 511.

### 4-Methoxy-1,1'-biphenyl:

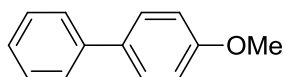

$^1\text{H}$  NMR (400 MHz,  $\text{CDCl}_3$ )  $\delta$ (ppm): 7.58 (m, 4H), 7.45 (m, 2H), 7.36 (d,  $J= 7.2$ , 1H), 7.03 (d,  $J= 8.8$ , 2H), 3.89 (s, 3H);  $^{13}\text{C}$  NMR (100 MHz,  $\text{CDCl}_3$ )  $\delta$  (ppm): 159.15, 140.85, 133.80, 128.74, 128.18, 126.76, 126.68, 114.21, 55.38; FT-IR (KBr): 2953, 2920, 2848, 1608, 1521, 1478, 1452, 1280, 1246, 1033, 831, 804, 684, 484.

### 4-chloro-1,1'-biphenyl:

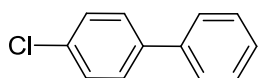

$^1\text{H}$  NMR (400 MHz,  $\text{CDCl}_3$ )  $\delta$  (ppm): 7.60-7.55 (m, 4H), 7.50-7.40 (m, 4H), 7.38 (s, 1H);  $^{13}\text{C}$  NMR (100 MHz,  $\text{CDCl}_3$ )  $\delta$  (ppm): 140.02, 139.69, 133.40, 128.93, 128.91, 1228.42, 127.62, 127.02; FT-IR (KBr): 2922, 2856, 1467, 1387, 1262, 1010, 826, 754, 684, 468.

#### 4-fluoro-1,1'-biphenyl:

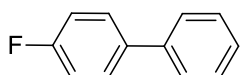

$^1\text{H}$  NMR (400 MHz,  $\text{CDCl}_3$ )  $\delta$ (ppm): 7.66-7.57 (m, 4H), 7.51-7.46 (m, 2H), 7.41-7.37 (s, 1H), 7.20-7.15(m, 2H);  $^{13}\text{C}$  NMR (100 MHz,  $\text{CDCl}_3$ )  $\delta$  (ppm): 140.29, 137.38, 137.35, 128.86, 128.79, 128.76, 128.68, 127.29, 127.20, 127.06, 115.75, 115.54;  $^{19}\text{F}$  NMR (376 MHz,  $\text{CDCl}_3$ )  $\delta$  (ppm): -115.86; FT-IR (KBr): 3552, 3481, 3415, 3235, 1642, 1256, 1093, 1018, 829, 798, 753, 688, 478.

#### 4-methoxy-4'-nitro-1,1'-biphenyl:

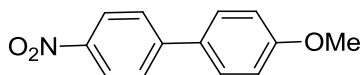

$^1\text{H}$  NMR (400 MHz,  $\text{CDCl}_3$ )  $\delta$  (ppm): 8.31 (d,  $J=8.8$ , 2H), 7.73 (d,  $J=8.8$ , 2H), 7.62 (d,  $J=8.8$ , 2H), 7.05(d,  $J=8.8$ , 2H), 3.91(s,3H);  $^{13}\text{C}$  NMR (100 MHz,  $\text{CDCl}_3$ )  $\delta$  (ppm): 160.46, 147.24, 146.56, 131.10, 128.61, 127.11, 124.19, 114.63, 55.46; FT-IR (KBr): 1594, 1510, 1452, 1339, 1250, 1181, 1101, 1021.

#### 4,4'-dimethoxy-1,1'-biphenyl:

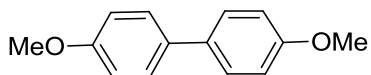

$^1\text{H}$  NMR (400 MHz,  $\text{CDCl}_3$ )  $\delta$  (ppm): 7.51 (d,  $J=8.8$ , 2H), 7.00 (d,  $J=8.8$ , 2H), 3.88 (s, 3H);  $^{13}\text{C}$  NMR (100 MHz,  $\text{CDCl}_3$ )  $\delta$  (ppm): 158.69, 133.49, 127.77, 114.17, 55.38; FT-IR (KBr): 3415, 2952, 2922, 2842, 1610, 1498, 1264, 1180, 1039.

#### 4,4'-dichloro-1,1'-biphenyl:

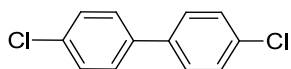

$^1\text{H}$  NMR (400 MHz,  $\text{CDCl}_3$ )  $\delta$  (ppm): 7.52-7.50 (d,  $J=8.4$ , 4H), 7.45-7.43 (d,  $J=8.4$ , 4H);  $^{13}\text{C}$  NMR (100 MHz,  $\text{CDCl}_3$ )  $\delta$  (ppm): 138.44, 133.76, 129.08, 128.25; FT-IR (KBr): 2921, 2855, 1087, 1015, 850, 541, 499.

#### 3,5-difluoro-4'-nitro-1,1'-biphenyl:

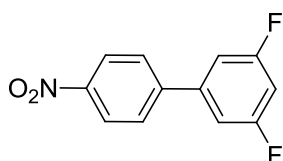

$^1\text{H}$ NMR (400 MHz,  $\text{CDCl}_3$ )  $\delta$  (ppm): 7.79 (d,  $J=8.4$ , 2H), 7.68 (d,  $J=8.8$ , 2H), 7.17-7.11(m, 2H), 6.93-6.87 (m, 1H);  $^{13}\text{C}$  NMR (100 MHz,  $\text{CDCl}_3$ )  $\delta$  (ppm): 164.75, 164.63, 162.27, 162.14, 147.82, 145.08, 141.98, 141.88, 138.69, 127.94, 124.88, 124.34, 110.61, 110.54, 110.42, 110.35, 104.47, 104.22, 103.97;  $^{19}\text{F}$  NMR (376 MHz,  $\text{CDCl}_3$ )  $\delta$  (ppm): -108.34; FT-IR (KBr): 1633, 1591, 1509, 1452, 1396, 1343, 1258, 1193, 1108, 1022, 839, 799, 745, 682, 595, 519.

#### 1-phenylnaphthalene:

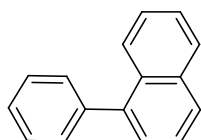

$^1\text{H}$  NMR (400 MHz,  $\text{CDCl}_3$ )  $\delta$  (ppm): 7.96-7.89 (m, 2H), 7.59-7.57 (m, 1H), 7.55-7.53 (m, 6H), 7.52-7.48 (m, 3H);  $^{13}\text{C}$  NMR (100 MHz,  $\text{CDCl}_3$ )  $\delta$  (ppm): 140.77, 140.28, 133.80, 131.63, 131.62, 130.11, 130.10, 128.29, 127.66, 127.27, 126.96, 126.05, 125.80, 125.42; FT-IR (KBr): 3050, 2921, 2856, 1590, 1498, 1448, 1392, 701, 653, 565.

#### 2-(naphthalen-1-yl)thiophene:

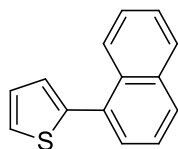

$^1\text{H}$  NMR (400 MHz,  $\text{CDCl}_3$ )  $\delta$  (ppm): 8.32-8.29 (m, 1H), 8.03-7.91 (m, 2H), 7.68-7.64(m, 1H), 7.60-7.56 (m, 3H), 7.54-7.46(m, 1H), 7.37-7.32(m, 1H), 7.27-7.24(m, 1H);  $^{13}\text{C}$  NMR (100 MHz,  $\text{CDCl}_3$ )  $\delta$  (ppm): 141.84, 133.91, 132.50, 131.94, 128.46, 128.40, 128.27, 127.46, 127.35, 126.51, 126.08, 125.83, 125.70, 123,32; FT-IR (KBr): 3051, 2960, 2856, 1586, 1505, 1433, 1387, 1329, 1262, 1217, 1167, 1092, 1023, 840, 794, 697, 610, 550.

#### 4-methyl-1,1'-biphenyl:

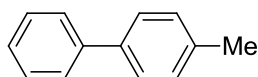

$^1\text{H}$  NMR (400 MHz,  $\text{CDCl}_3$ )  $\delta$  (ppm): 3.01 (s, 3H), 7.39 (d, 2H,  $J=7.6$ ), 7.49-7.45 (t, 1H), 7.59-7.55 (t, 2H), 7.65 (d, 2H,  $J=8$ ), 7.75-7.73 (t, 2H);  $^{13}\text{C}$  NMR (100 MHz,  $\text{CDCl}_3$ )  $\delta$  (ppm): 141.33, 138.53, 137.16, 129.68, 129.67, 128.91, 127.18, 127.16, 21.29; FT-IR (KBr): 3416, 2958, 2368, 1626, 1508, 1023, 622, 545, 501, 482, 464, 442, 424.

#### 2-methyl-1,1'-biphenyl:

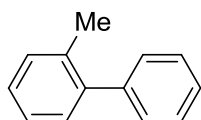

$^1\text{H}$  NMR (400 MHz,  $\text{CDCl}_3$ )  $\delta$  (ppm): 2.35 (s, 3H), 7.34-7.31 (t, 4H), 7.42-7.39 (t, 3H), 7.50-7.46 (t, 2H);  $^{13}\text{C}$  NMR (100 MHz,  $\text{CDCl}_3$ )  $\delta$  (ppm): 142, 141.98, 135.40, 130.36, 129.86, 129.25, 128.12, 127.31, 126.82, 125.82, 20.55; FT-IR (KBr): 3677, 3527, 3440, 2921, 2857, 1736, 1456, 1261, 1094, 808, 557, 447.

#### 5-phenylpyrimidine:

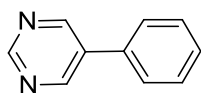

$^1\text{H}$  NMR (400 MHz,  $\text{CDCl}_3$ )  $\delta$  (ppm): 9.25 (s, 1H), 9.01 (s, 2H), 7.64-7.60 (m, 2H), 7.58-7.54 (m, 2H), 7.53-7.49 (m, 1H);  $^{13}\text{C}$  NMR (100 MHz,  $\text{CDCl}_3$ )  $\delta$  (ppm): 157.14, 154.91, 134.50, 134.10, 129.51, 129.16, 127.04; FT-IR (KBr): 3659, 3038, 2960, 2921, 2856, 1726, 1549, 1411, 1260, 1089, 1019, 867, 802, 696.

**[1,1'-biphenyl]-4-carbaldehyde:**

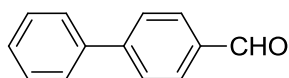

$^1\text{H}$  NMR (400 MHz,  $\text{CDCl}_3$ )  $\delta$  (ppm): 10.09 (s, 1H), 8.21-7.98 (m, 2H), 7.80-7.72 (m, 2H), 7.69-7.67 (m, 2H), 7.54-7.46 (m, 2H), 7.44 (s, 1H);  $^{13}\text{C}$  NMR (100 MHz,  $\text{CDCl}_3$ )  $\delta$  (ppm): 192.00, 147.24, 139.74, 135.21, 130.32, 129.06, 128.52, 127.73, 127.41; FT-IR (KBr): 1597, 1480, 1412, 1298, 1214, 832, 757, 698.

**[1,1'-biphenyl]-3-carbaldehyde:**

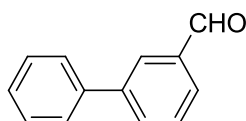

$^1\text{H}$  NMR (400 MHz,  $\text{CDCl}_3$ )  $\delta$  (ppm): 10.13 (s, 1H), 8.41 (s, 1H), 8.14 (s, 2H), 7.91-7.88 (m, 3H), 7.68-7.42 (m, 3H);  $^{13}\text{C}$  NMR (100 MHz,  $\text{CDCl}_3$ )  $\delta$  (ppm): 192.45, 142.19, 139.71, 136.93, 133.19, 129.54, 129.05, 128.69, 128.25, 128.06, 127.19; FT-IR (KBr): 1579, 1316, 1260, 743, 694, 613.

**[1,1'-biphenyl]-4-ol:**

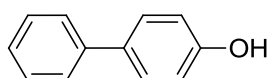

$^1\text{H}$  NMR (400 MHz,  $\text{CDCl}_3$ )  $\delta$  (ppm): 7.58 (d,  $J=7.6$ , 2H), 7.52 (d,  $J=8.4$ , 2H), 7.47-7.43 (m, 2H), 7.36-7.29 (m, 1H), 6.94 (d,  $J=8.4$ , 2H), 4.68 (s, 1H);  $^{13}\text{C}$  NMR (100 MHz,  $\text{CDCl}_3$ )  $\delta$  (ppm): 155.07, 140.77, 134.06, 128.75, 128.43, 128.42, 1226.75, 115.66; FT-IR (KBr): 3645, 3529, 3441, 2960, 2784, 2371, 1516, 1259, 1092, 1020, 802, 756, 690, 557, 429.

**5-phenyl-1H-indole:**

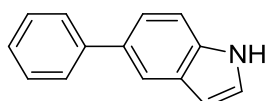

$^1\text{H}$  NMR (400 MHz,  $\text{CDCl}_3$ )  $\delta$  (ppm): 8.23 (s, 1H), 7.9 (s, 1H), 7.69 (d,  $J=7.6$ , 2H), 7.45-7.49 (m, 4H), 7.29-7.36 (m, 2H), 6.65(s,1H);  $^{13}\text{C}$  NMR (100 MHz,  $\text{CDCl}_3$ )  $\delta$  (ppm): 142.57, 135.32, 133.46, 128.66, 128.41, 127.42, 126.33, 124.87, 121.96, 119.29, 111.27, 103.08; FT-IR (KBr): 2959, 2922, 2855, 2357, 1713, 1463, 1264, 1093, 1022, 877, 805, 762, 697.

**[1,1'-biphenyl]-2-carbaldehyde:**

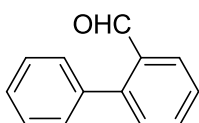

$^1\text{H}$  NMR (400 MHz,  $\text{CDCl}_3$ )  $\delta$ (ppm): 10.02 (s, 1H), 8.07 (d,  $J=8$ , 1H), 7.70-7.66 (m, 1H), 7.56-7.43 (m, 5H), 7.41 (s,2H);  $^{13}\text{C}$  NMR (100 MHz,  $\text{CDCl}_3$ )  $\delta$  (ppm): 192.55, 146.01, 137.76, 133.72, 133.61, 130.81, 130.14, 128.46, 128.15, 127.81, 127.59; FT-IR (KBr): 3639, 2921, 2855, 2751, 1695, 1597, 1462, 1395, 1260, 1193, 1085, 1019, 752, 702, 651.

**4-(naphthalen-1-yl)benzonitrile:**

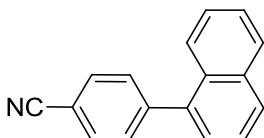

$^1\text{H}$  NMR (400 MHz,  $\text{CDCl}_3$ )  $\delta$  (ppm): 7.97 (m, 2H), 7.82 (m, 3H), 7.65(d,  $J=8$ , 2H), 7.61-7.55 (m, 2H), 7.53-7.49 (m, 1H), 7.44(d,  $J=6.8$ , 1H);  $^{13}\text{C}$  NMR (100 MHz,  $\text{CDCl}_3$ )  $\delta$  (ppm): 145.69, 138.21, 133.80, 132.18, 130.96, 130.85, 128.81, 128.58, 127.07, 126.68, 126.21, 125.38, 125.22, 118.99, 111.16; FT-IR (KBr): 3049, 2958, 2921, 2855, 2227, 1647, 1605, 1502, 1458, 1395, 1339, 1261, 1096, 1022, 966, 573.

**3',5'-difluoro-[1,1'-biphenyl]-4-carbonitrile:**

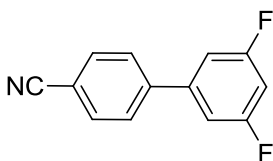

$^1\text{H}$  NMR (400 MHz,  $\text{CDCl}_3$ )  $\delta$  (ppm): 7.79 (d, 2H,  $J=8$ ), 7.68 (d, 2H,  $J=8$ ), 7.17-7.10(m, 2H), 6.93-6.87(m, 1H);  $^{13}\text{C}$  NMR (100 MHz,  $\text{CDCl}_3$ )  $\delta$  (ppm): 164.74, 164.62, 162.27, 162.14,

143.20, 142.39, 132.85, 127.74, 118.51, 112.25, 110.42, 110.35, 110.23, 110.16, 104.22, 103.97, 103.72;  $^{19}\text{F}$  NMR (376 MHz,  $\text{CDCl}_3$ )  $\delta$  (ppm): -108.49; FT-IR (KBr): 2219, 1594, 1556, 1447, 1396, 1334, 1259, 1205, 1112, 1023, 988, 871, 830, 675, 599, 539, 505.

**4'-methoxy-[1,1'-biphenyl]-4-carbaldehyde:**

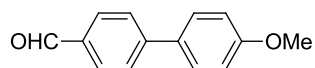

$^1\text{H}$  NMR (400 MHz,  $\text{CDCl}_3$ )  $\delta$  (ppm): 10.07 (s, 1H), 7.96 (d,  $J= 8.4$ , 2H), 7.75 (d,  $J= 8.4$ , 2H), 7.05(d,  $J= 8.8$ , 2H), 7.04(d,  $J= 8.4$ , 2H), 3.90 (s, 3H);  $^{13}\text{C}$  NMR (100 MHz,  $\text{CDCl}_3$ )  $\delta$  (ppm): 191.97, 160.13, 146.82, 134.69, 132.08, 130.37, 128.54, 127.09, 114.50, 55.44; FT-IR (KBr): 1682, 1600, 1292, 1260, 1183, 1088, 1025, 699, 490.

**4'-methyl-[1,1'-biphenyl]-4-carbaldehyde:**

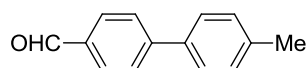

$^1\text{H}$  NMR (400 MHz,  $\text{CDCl}_3$ )  $\delta$  (ppm): 10.08 (s, 1H), 7.97 (d,  $J=8$ , 2H), 7.79-7.73 (m, 2H), 7.59-7.56 (m, 2H), 7.38-7.32(m, 2H), 2.45(s, 3H);  $^{13}\text{C}$  NMR (100 MHz,  $\text{CDCl}_3$ )  $\delta$  (ppm): 191.99, 147.19, 138.57, 136.82, 134.99, 130.32, 129.78, 127.45, 127.23, 21.23; FT-IR (KBr): 2959, 2923, 2857, 2729, 1697, 1605, 1454, 1386, 1263, 1082, 1020, 695, 472.

**1,2-diphenylethyne:**

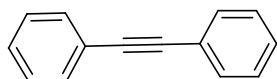

$^1\text{H}$  NMR ( $\text{CDCl}_3$ , 400 MHz)  $\delta$  (ppm): 7.58-7.56 (m, 4H), 7.41-7.37 (m, 6H);  $^{13}\text{C}$  NMR ( $\text{CDCl}_3$ , 100 MHz)  $\delta$  (ppm): 131.66, 128.40, 128.32, 128.30, 89.42; FT-IR (KBr): 3687, 3062, 3023, 2920, 2288, 1535, 1439, 1381, 1066, 1023, 913, 754, 726, 688, 660, 541, 518

**1-nitro-4-(phenylethynyl)benzene:**

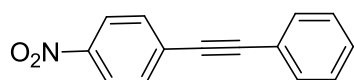

$^1\text{H}$  NMR ( $\text{CDCl}_3$ , 400 MHz)  $\delta$  (ppm): 8.25 (d,  $J=8$ , 2H), 7.70 (d,  $J=8$ , 2H), 7.61-7.57 (m, 2H), 7.46-7.40 (m, 3H);  $^{13}\text{C}$  NMR ( $\text{CDCl}_3$ , 100 MHz)  $\delta$  (ppm): 146.99, 132.30, 131.88, 130.29, 129.32, 128.58, 123.68, 122.12, 94.74, 87.59; FT-IR (KBr): 2207, 1687, 1587, 1508, 1170, 1098, 819, 757, 685.

### 2-(phenylethynyl)thiophene:

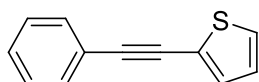

$^1\text{H}$  NMR ( $\text{CDCl}_3$ , 400 MHz)  $\delta$  (ppm): 7.59-7.56 (m, 2H), 7.42-7.38 (m, 3H), 7.36-7.33 (m, 2H), 7.07-7.05 (m, 1H);  $^{13}\text{C}$  NMR ( $\text{CDCl}_3$ , 100 MHz)  $\delta$  (ppm): 131.95, 131.46, 128.47, 128.42, 127.31, 127.15, 123.35, 122.96, 93.08, 82.66; FT-IR (KBr): 3551, 3473, 3411, 3233, 1625, 799, 751, 694.

### 1-chloro-4-(phenylethynyl)benzene:

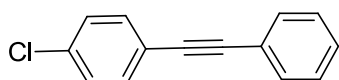

$^1\text{H}$  NMR ( $\text{CDCl}_3$ , 400 MHz)  $\delta$  (ppm): 7.58-7.54 (m, 2H), 7.50 (d,  $J=8.4$ , 2H), 7.41-7.35 (m, 5H);  $^{13}\text{C}$  NMR ( $\text{CDCl}_3$ , 100 MHz)  $\delta$  (ppm): 134.28, 132.84, 131.63, 128.73, 128.52, 128.43, 122.94, 121.80, 90.34, 88.26; FT-IR (KBr): 2207, 1687, 1587, 1508, 1170, 1098, 819, 757, 685.

### 1-methoxy-4-(phenylethynyl)benzene:

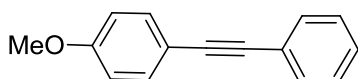

$^1\text{H}$  NMR ( $\text{CDCl}_3$ , 400 MHz)  $\delta$  (ppm): 7.56-7.50 (m, 4H), 7.40-7.34 (m, 3H), 6.91 (d, 2H,  $J=8.8$ ), 3.87 (s, 3H);  $^{13}\text{C}$  NMR ( $\text{CDCl}_3$ , 100 MHz)  $\delta$  (ppm): 159.62, 133.08, 131.48, 128.34, 127.97, 123.60, 115.38, 114.01, 89.38, 88.08, 55.34; FT-IR (KBr): 3054, 2955, 2923, 2846, 1599, 1507, 1450, 1252, 1177, 1139, 1100, 1073, 1026, 829, 804, 753, 692, 526.



**1-fluoro-4-(phenylethynyl)benzene:**

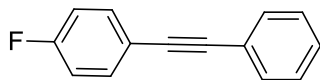

$^1\text{H}$  NMR ( $\text{CDCl}_3$ , 400 MHz)  $\delta$  (ppm): 7.58-7.54 (m, 4H), 7.42-7.36 (m, 3H), 7.11-7.06 (t, 2H);  $^{13}\text{C}$  NMR ( $\text{CDCl}_3$ , 100 MHz)  $\delta$  (ppm): 163.76, 161.28, 133.56, 133.47, 132.54, 131.59, 129.25, 128.48, 128.42, 128.38, 123.10, 119.40, 119.37, 115.79, 115.57, 89.07, 89.06, 88.32;  $^{19}\text{F}$  NMR (376 MHz,  $\text{CDCl}_3$ )  $\delta$  (ppm): -110.96; FT-IR (KBr): 2921, 2856, 1882, 1746, 1589, 1557, 1443, 1272, 1219, 1155, 1096, 1021, 836, 798, 751, 685, 655, 504, 485.

**3-phenylprop-2-yn-1-ol:**

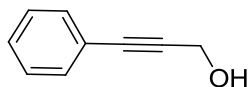

$^1\text{H}$  NMR ( $\text{CDCl}_3$ , 400 MHz)  $\delta$  (ppm): 7.49-7.45 (m, 2H), 7.38-7.32 (m, 3H), 4.54 (s, 2H), 1.23 (s, 1H);  $^{13}\text{C}$  NMR ( $\text{CDCl}_3$ , 100 MHz)  $\delta$  (ppm): 131.71, 128.53, 128.55, 122.53, 87.18, 85.76, 51.71; FT-IR (KBr): 3409, 3064, 2922, 2858, 2236, 1959, 1741, 1488, 1445, 1367, 1260, 1084, 1026, 801, 756, 691, 619, 574, 518.

**3-(thiophen-2-yl)prop-2-yn-1-ol:**

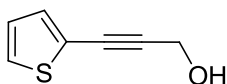

$^1\text{H}$  NMR ( $\text{CDCl}_3$ , 400 MHz)  $\delta$  (ppm): 7.30-7.29 (m, 1H), 7.25 (d, 1H,  $J=3.6$ ), 7.02-6.99 (m, 1H), 4.54 (s, 2H), 1.81 (s, 1H);  $^{13}\text{C}$  NMR ( $\text{CDCl}_3$ , 100 MHz)  $\delta$  (ppm): 132.44, 127.48, 127.01, 122.43, 91.12, 79.10, 51.77; FT-IR (KBr): 3374, 3103, 2921, 2856, 2221, 1635, 1516, 1418, 1356, 1258, 1227, 1188, 1082, 1016, 911, 837, 802, 701, 574.

#### 4-(phenylethynyl)benzaldehyde:

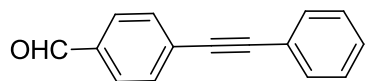

$^1\text{H}$  NMR ( $\text{CDCl}_3$ , 400 MHz)  $\delta$  (ppm): 10.06 (s, 1H), 7.91 (d, 2H,  $J=8$ ), 7.71 (d, 2H,  $J=8$ ), 7.61-7.58 (m, 2H), 7.42-7.41 (m, 3H);  $^{13}\text{C}$  NMR ( $\text{CDCl}_3$ , 100 MHz)  $\delta$  (ppm): 191.51, 135.41, 132.14, 131.82, 129.64, 129.63, 129.01, 128.52, 122.50, 93.48, 88.54; FT-IR (KBr): 3734, 3426, 2920, 2845, 1695, 1634, 1603, 1563, 1094, 1022, 811, 751, 688, 627, 508.

#### 5-(phenylethynyl)pyrimidine:

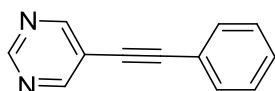

$^1\text{H}$  NMR ( $\text{CDCl}_3$ , 400 MHz)  $\delta$  (ppm): 9.19 (s, 1H), 8.91 (s, 2H), 7.61-7.58 (m, 2H), 7.45-7.40 (m, 3H);  $^{13}\text{C}$  NMR ( $\text{CDCl}_3$ , 100 MHz)  $\delta$  (ppm): 158.63, 156.55, 131.82, 129.45, 128.60, 121.76, 120.06, 96.47, 82.25; FT-IR (KBr): 3037, 2878, 2394, 2219, 1950, 1713, 1539, 1493, 1445, 1412, 1334, 1180, 1068, 1019, 805, 757, 702, 635, 545.

#### 4-(p-tolyethynyl)benzaldehyde

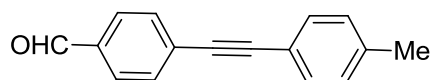

$^1\text{H}$  NMR ( $\text{CDCl}_3$ , 400 MHz)  $\delta$  (ppm): 10.05 (s, 1H), 7.89 (d, 2H,  $J=8$ ), 7.70 (d, 2H,  $J=8$ ), 7.48 (d, 2H,  $J=8$ ), 7.22 (d, 2H,  $J=8$ ), 2.42 (s, 3H);  $^{13}\text{C}$  NMR ( $\text{CDCl}_3$ , 100 MHz)  $\delta$  (ppm): 191.50, 139.32, 135.27, 132.05, 131.73, 129.90, 129.61, 129.29, 119.42, 93.83, 88.02, 21.62; FT-IR (KBr): 3552, 3476, 3413, 3238, 2960, 2921, 2842, 2209, 1697, 1606, 1512, 1257, 1204, 1170, 1091, 1020, 811, 623, 509, 478.

#### 5-(p-tolyethynyl)pyrimidine:

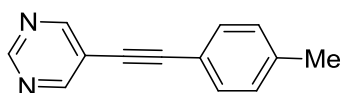

$^1\text{H}$  NMR ( $\text{CDCl}_3$ , 400 MHz)  $\delta$  (ppm): 9.17 (s, 1H), 8.89 (s, 2H), 7.48 (d, 2H,  $J=8$ ), 7.23 (d, 2H,  $J=8$ ), 2.42 (s, 3H).  $^{13}\text{C}$  NMR ( $\text{CDCl}_3$ , 100 MHz)  $\delta$  (ppm): 158.57, 156.45, 139.81, 131.72, 129.37, 120.27, 118.69, 96.74, 81.72, 21.65; FT-IR (KBr): 3543, 2921, 2856, 2214, 1930, 1647, 1541, 1506, 1456, 1416, 1186, 1155, 1094, 1024, 813, 799, 714, 629, 463.

### 3-(phenylethynyl)benzaldehyde:

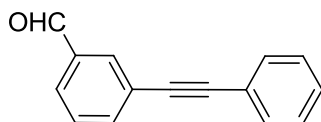

$^1\text{H}$  NMR ( $\text{CDCl}_3$ , 400 MHz)  $\delta$  (ppm): 10.06(s, 1H), 8.07(s, 1H), 7.88(d, 1H,  $J=7.6$ ), 7.83-7.80(t, 1H), 7.60-7.55(m, 3H), 7.42-7.40(t, 3H);  $^{13}\text{C}$  NMR ( $\text{CDCl}_3$ , 100 MHz)  $\delta$  (ppm): 191.60, 137.13, 136.52, 133.02, 131.73, 129.14, 128.92, 128.75, 128.47, 124.58, 122.68, 90.95, 87.85; FT-IR (KBr): 3415, 3060, 2962, 2922, 2855, 2355, 1789, 1488, 1442, 1263, 1192, 1092, 1024, 868, 801, 754, 685.

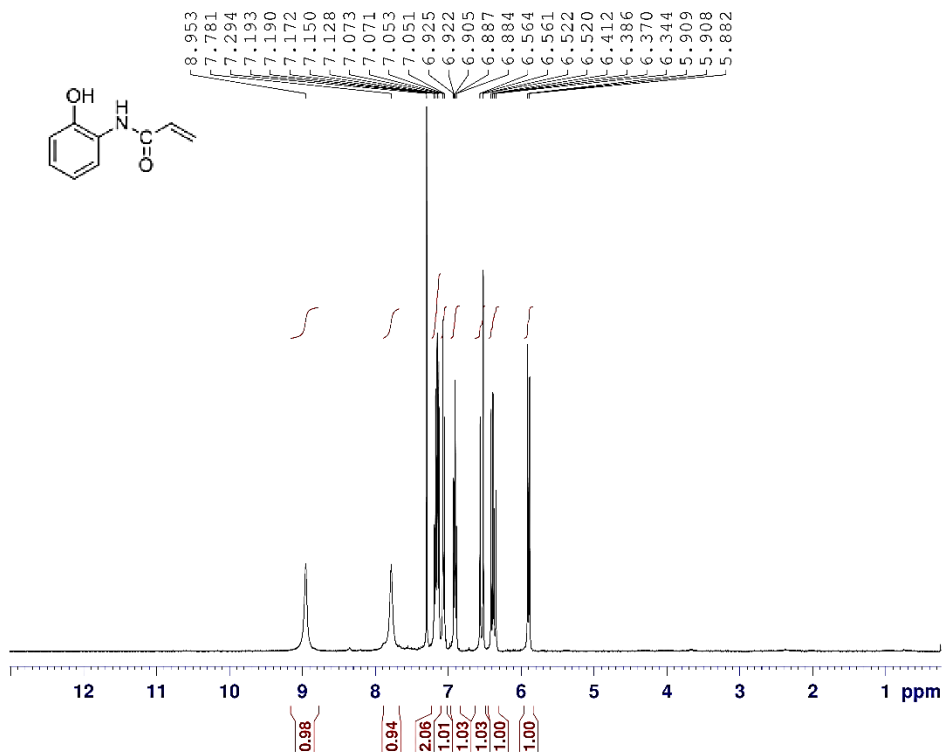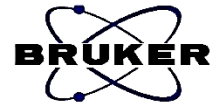

```

NAME      Dr.Gholi nejad (hamed)
EXPNO     2
PROCNO    1
Date_     20140820
Time      12.35
INSTRUM   spect
PROBHD    5 mm PABBO BB-
PULPROG   zg30
TD         65536
SOLVENT   CDCl3
NS         12
DS         0
SWH        8012.820 Hz
FIDRES     0.122266 Hz
AQ         4.0894966 sec
RG         203
DW         62.400 usec
DE         6.50 usec
TE         295.9 K
D1         6.0000000 sec
TDO        1

===== CHANNEL f1 =====
NUC1       1H
P1         14.00 usec
PT1        -2.00 dB
PL1W       11.86359406 W
SFO1       400.2236020 MHz
SI         32768
SF         400.2230000 MHz
WDW        EM
SSB        0
LB         0.30 Hz
GB         0
PC         1.00

```

<sup>1</sup>H NMR of N-(2-hydroxyphenyl)acrylamide (1)

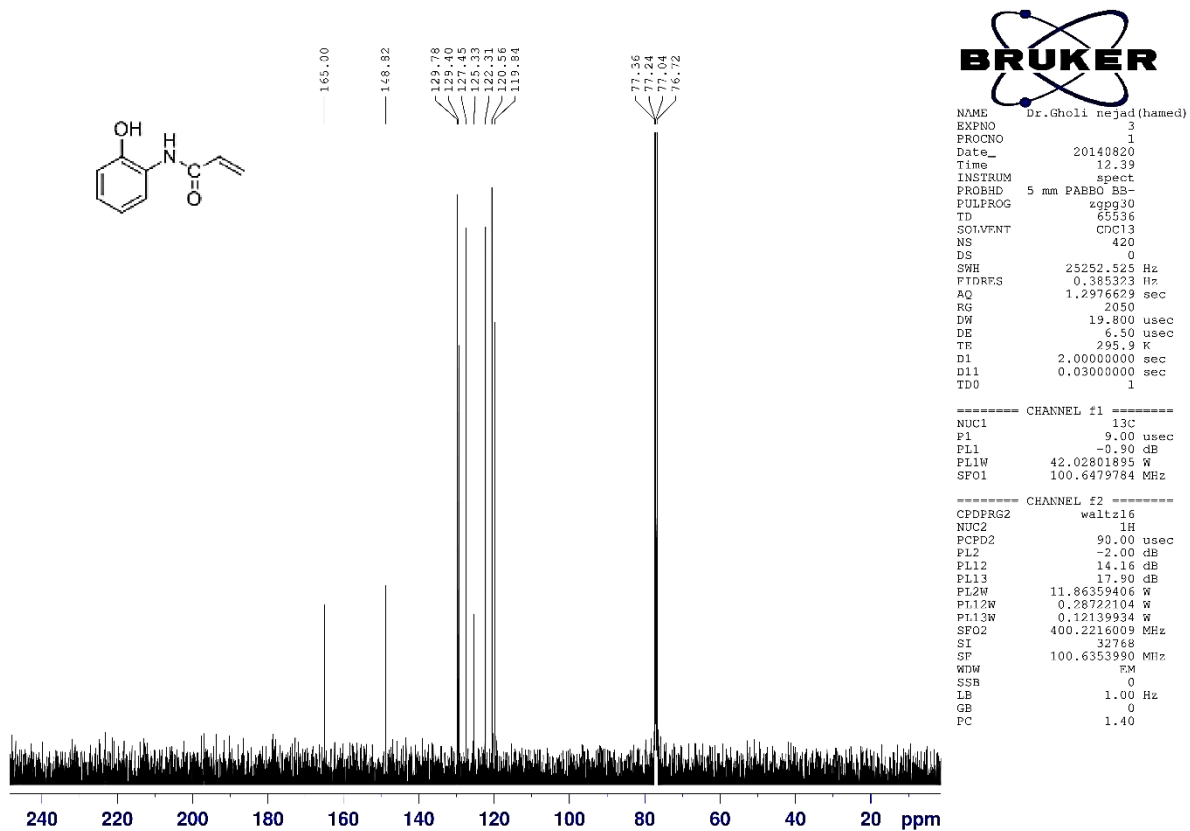

$^{13}\text{C}$  NMR of N-(2-hydroxyphenyl)acrylamide (1)

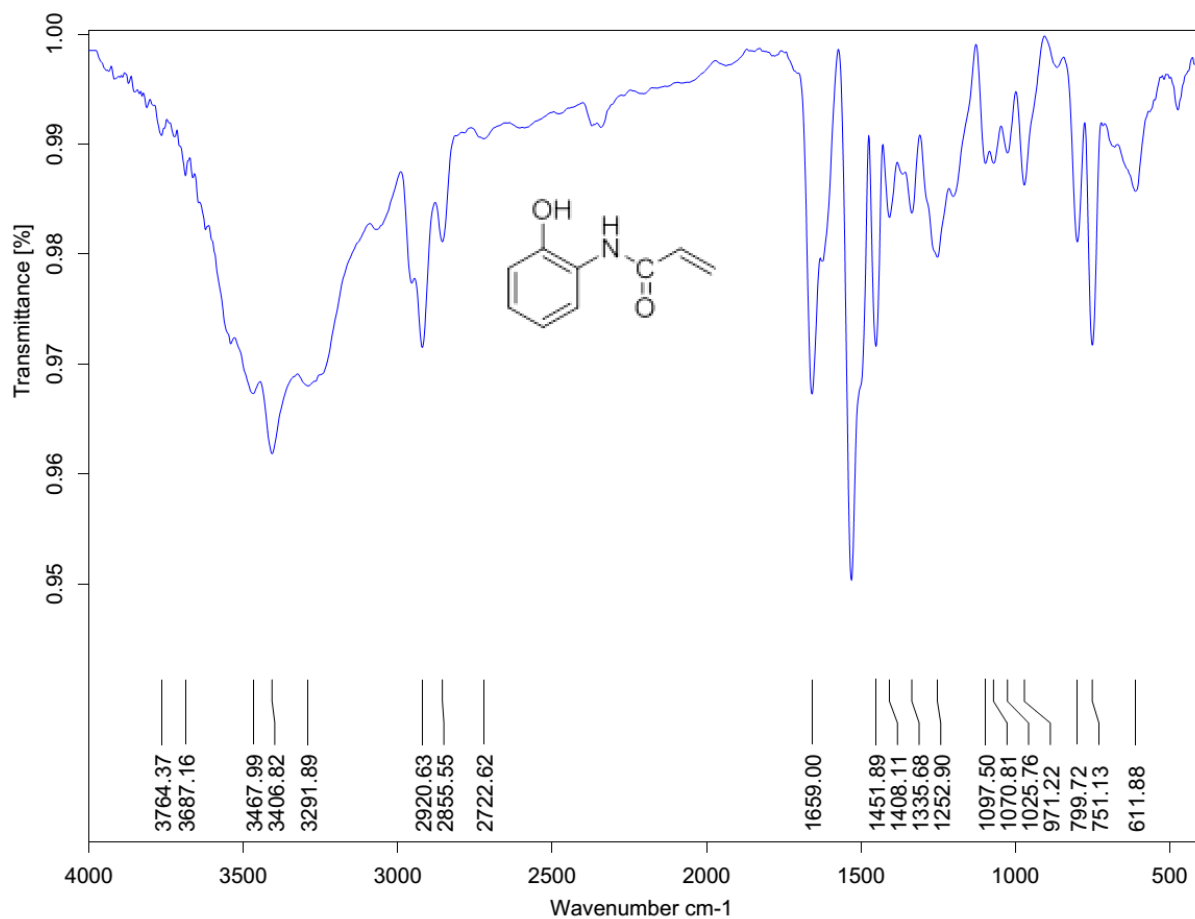

**FT-IR of N-(2-hydroxyphenyl)acrylamide (1)**

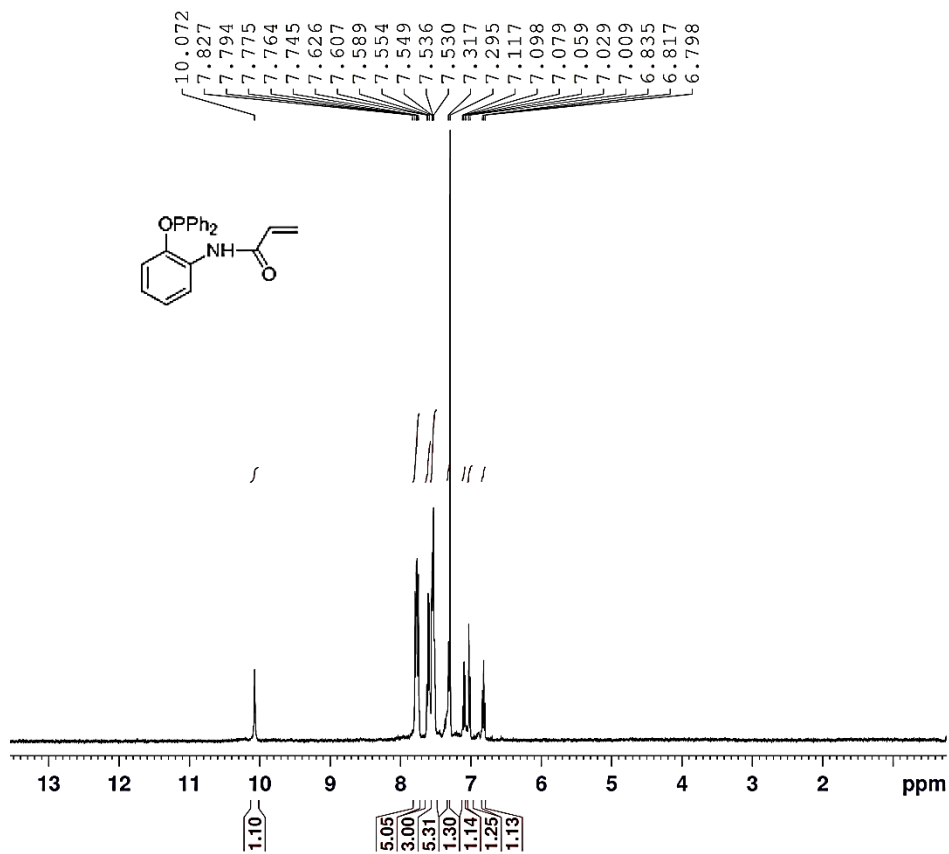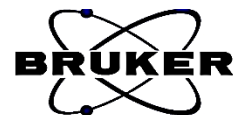

NAME Dr.Gholi nejad (hamed)  
 EXPNO 1  
 PROCNO 1  
 Date\_ 20140901  
 Time 10.30  
 INSTRUM spect  
 PROBHD 5 mm PABBO BB-  
 PULPROG zg30  
 TD 65536  
 SOLVENT CDCl3  
 NS 12  
 DS 0  
 SWH 8012.820 Hz  
 FIDRES 0.122266 Hz  
 AQ 4.0894966 sec  
 RG 322  
 DW 62.400 usec  
 DE 6.50 usec  
 TE 294.9 K  
 D1 6.0000000 sec  
 TDO 1

----- CHANNEL f1 -----  
 NUC1 1H  
 P1 14.00 usec  
 PL1 -2.00 dB  
 PL1W 11.86359406 W  
 SFO1 400.2236020 MHz  
 SI 32768  
 SF 400.2200000 MHz  
 WDW EM  
 SSB 0  
 LB 0.30 Hz  
 GB 0  
 PC 1.00

<sup>1</sup>H NMR of phosphinite monomer (2)

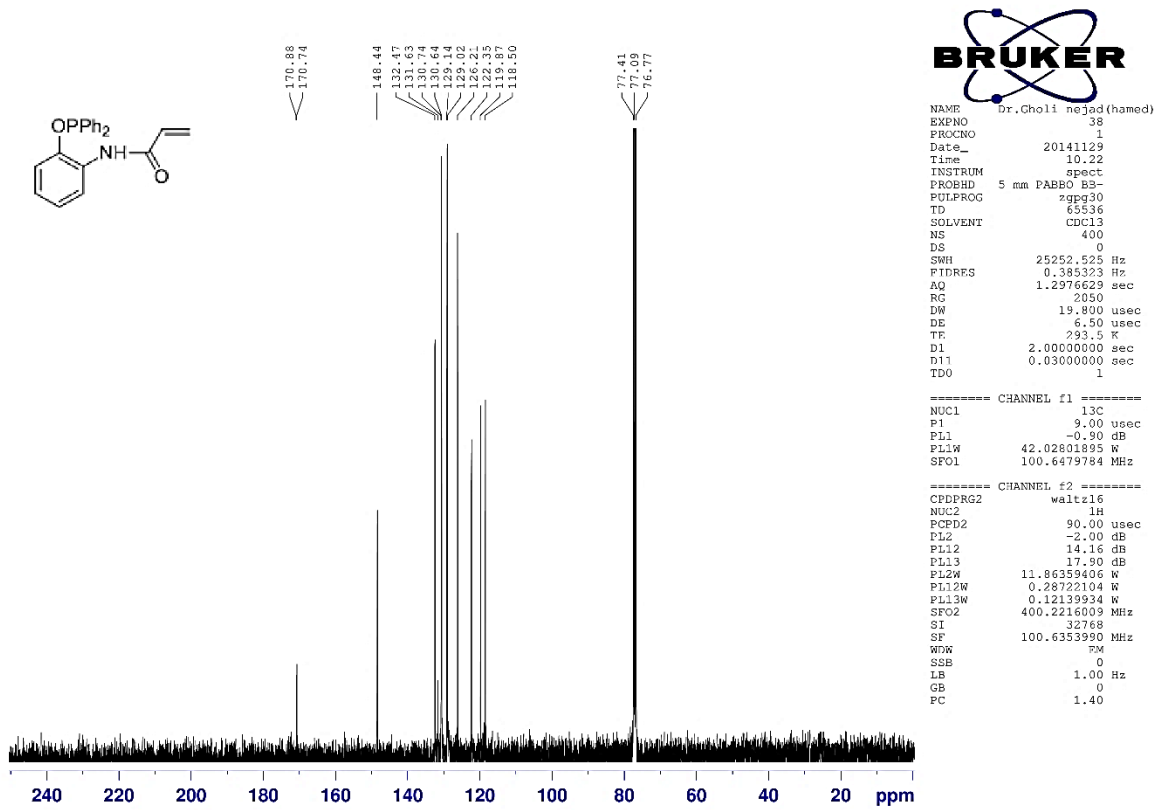

<sup>13</sup>C NMR of phosphinite monomer (2)



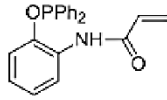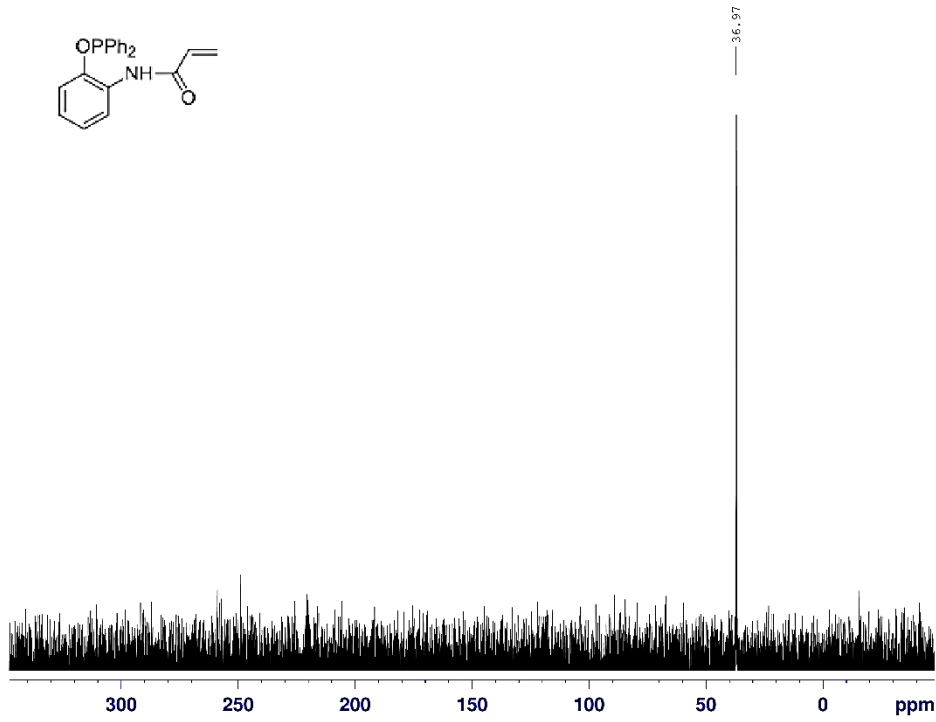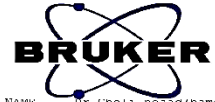

```

NAME: Dr.Gho11 nejad(named)
EXPNO: 1
PROCNO: 1
Date_: 20140901
Time: 10.25
INSTRUM: spect
PROBHD: 5 mm PABBO BB-
PULPROG: zgpg30
TD: 65536
SOLVENT: CDCl3
NS: 64
DS: 0
SWH: 64102.563 Hz
FIDRES: 0.978127 Hz
AQ: 0.5112308 sec
RG: 2050
DW: 7.800 usec
DE: 6.50 usec
TE: 295.1 K
D1: 2.0000000 sec
D11: 0.0300000 sec
TDO: 1

===== CHANNEL f1 =====
NUC1: 31P
P1: 9.00 usec
PL1: 0.30 dB
PL1W: 22.62180710 W
SFO1: 162.0363278 MHz

===== CHANNEL f2 =====
CPDPRG2: waltz16
NUC2: 1H
PCPD2: 90.00 usec
PL2: -2.00 dB
PL12: 14.48 dB
PL13: 17.90 dB
PL2W: 11.86359406 W
PL12W: 0.26681873 W
PL13W: 0.12139934 W
SFO2: 400.2216009 MHz
SI: 32768
SF: 162.0120260 MHz
WDW: EM
SSB: 0
LB: 1.00 Hz
GB: 0
PC: 1.40

```

**<sup>31</sup>P NMR of phosphinite monomer (2)**

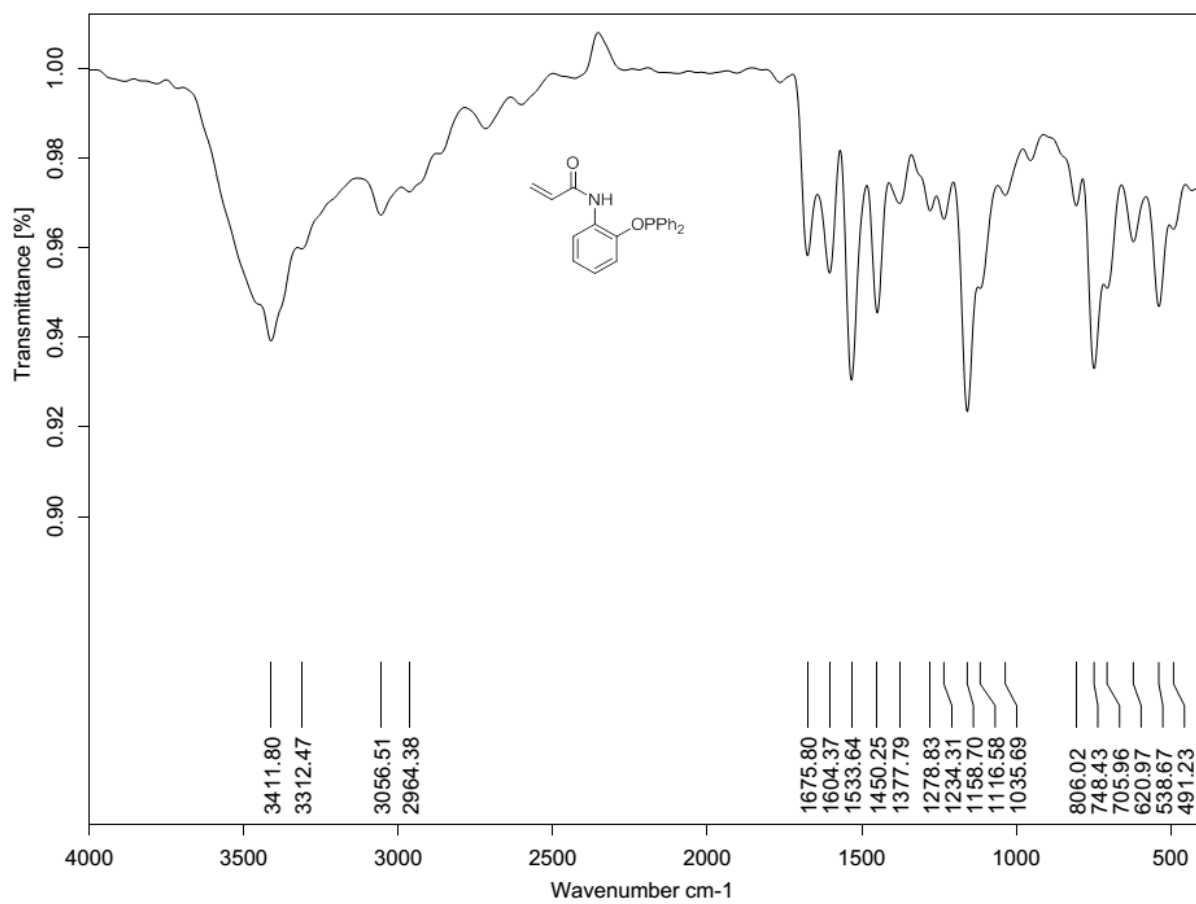

**FT-IR of phosphinite monomer (2)**

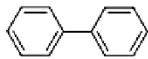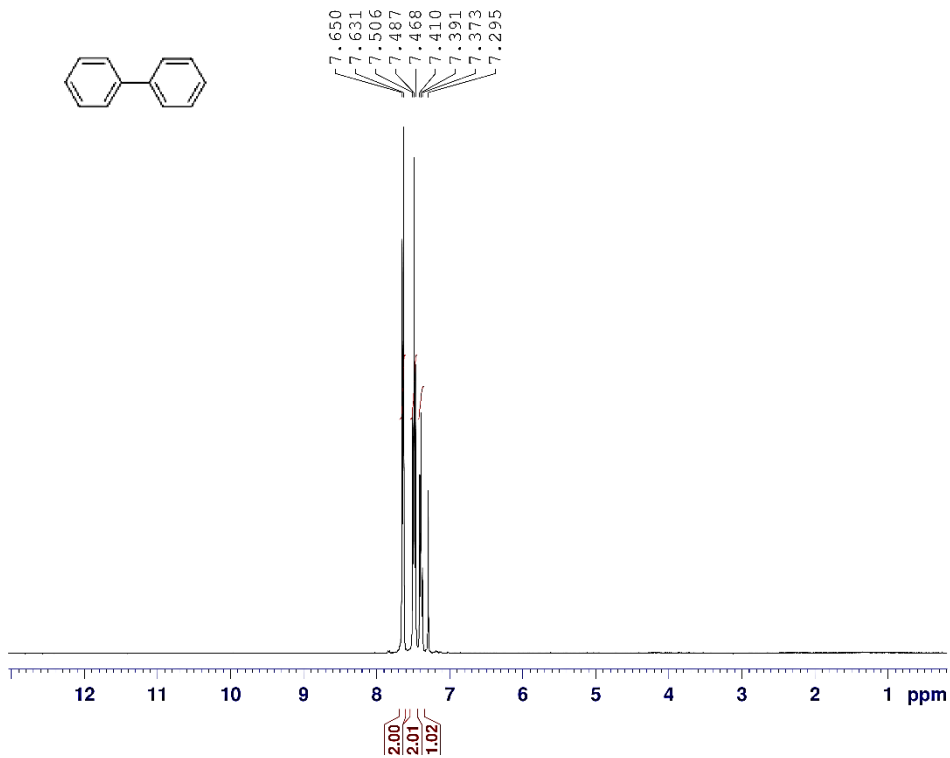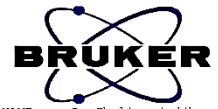

NAME Dr.Gholi nejad(hamed)  
EXPNO 30  
PROCNO 1  
Date\_ 20141115  
Time 12.21  
INSTRUM spect  
PROBHD 5 mm PABBO BB-  
PULPROG zg30  
TD 65536  
SOLVENT CDCl3  
NS 12  
DS 0  
SWH 8012.820 Hz  
FIDRES 0.122266 Hz  
AQ 4.0894966 sec  
RG 181  
DW 62.400 usec  
DE 6.50 usec  
TE 294.9 K  
D1 6.00000000 sec  
TD0 1

----- CHANNEL f1 -----  
NUC1 1H  
P1 14.00 usec  
PL1 -2.00 dB  
PL1W 11.86359406 W  
SF01 400.2236020 MHz  
SI 32768  
SF 400.2200000 MHz  
WDW EM  
SSB 0  
LB 0.30 Hz  
GB 0  
PC 1.00

<sup>1</sup>H NMR of 1,1'-biphenyl

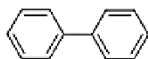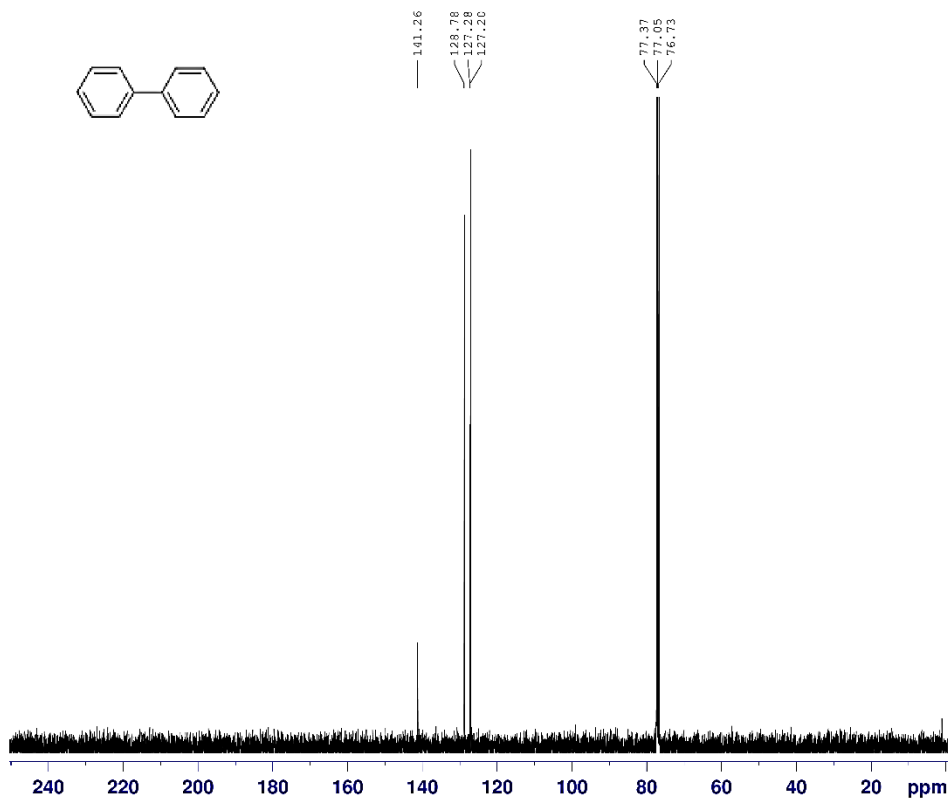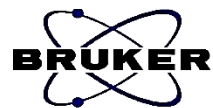

Dr.Gholi nejad(hamed)

```

NAME
EXPNO 31
PROCNO 1
Date_ 20141115
Time 12.24
INSTRUM spect
PROBHD 5 mm DABBO BB-
PULPROG zgpg30
TD 65536
SOLVENT CDCl3
NS 100
DS 0
SWH 25252.525 Hz
FIDRES 0.385323 Hz
AQ 1.2976629 sec
RG 2050
DW 19.800 usec
DE 6.50 usec
TE 294.8 K
D1 2.0000000 sec
D11 0.0300000 sec
TD0 1

```

```

===== CHANNEL f1 =====
NUC1 13C
P1 9.00 usec
PL1 -0.90 dB
PL1W 42.02801895 W
SFO1 100.6479784 MHz

```

```

===== CHANNEL f2 =====
CPDPRG2 waltz16
NUC2 1H
PCPD2 90.00 usec
PL2 -2.00 dB
PL12 14.16 dB
PL13 17.90 dB
PL12W 11.86359406 W
PL12W 0.28722104 W
PL13W 0.12139934 W
SFO2 400.2216009 MHz
SI 32768
SF 100.6353990 MHz
WDW EM
SSB 0
LB 1.00 Hz
GB 0
FC 1.40

```

<sup>13</sup>C NMR of 1,1'-biphenyl

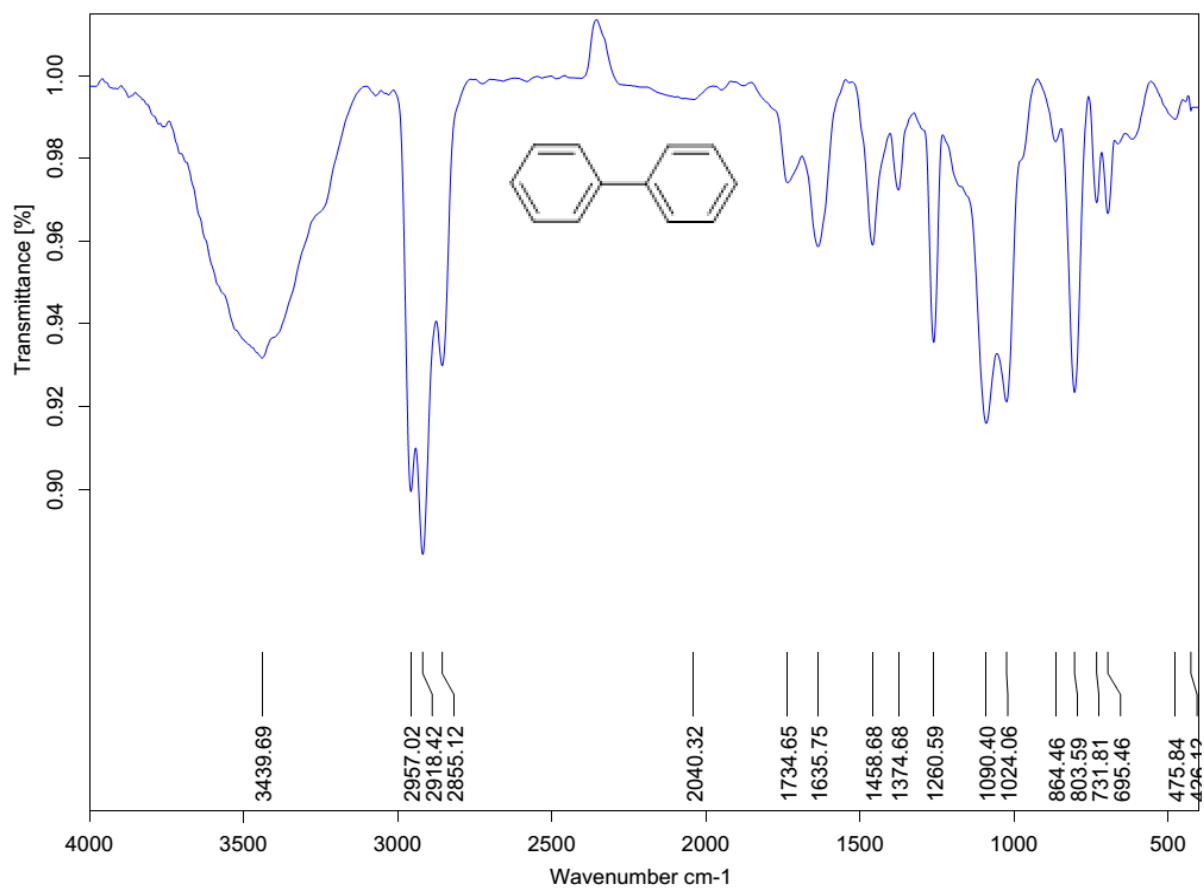

**FT-IR of 1,1'-biphenyl**

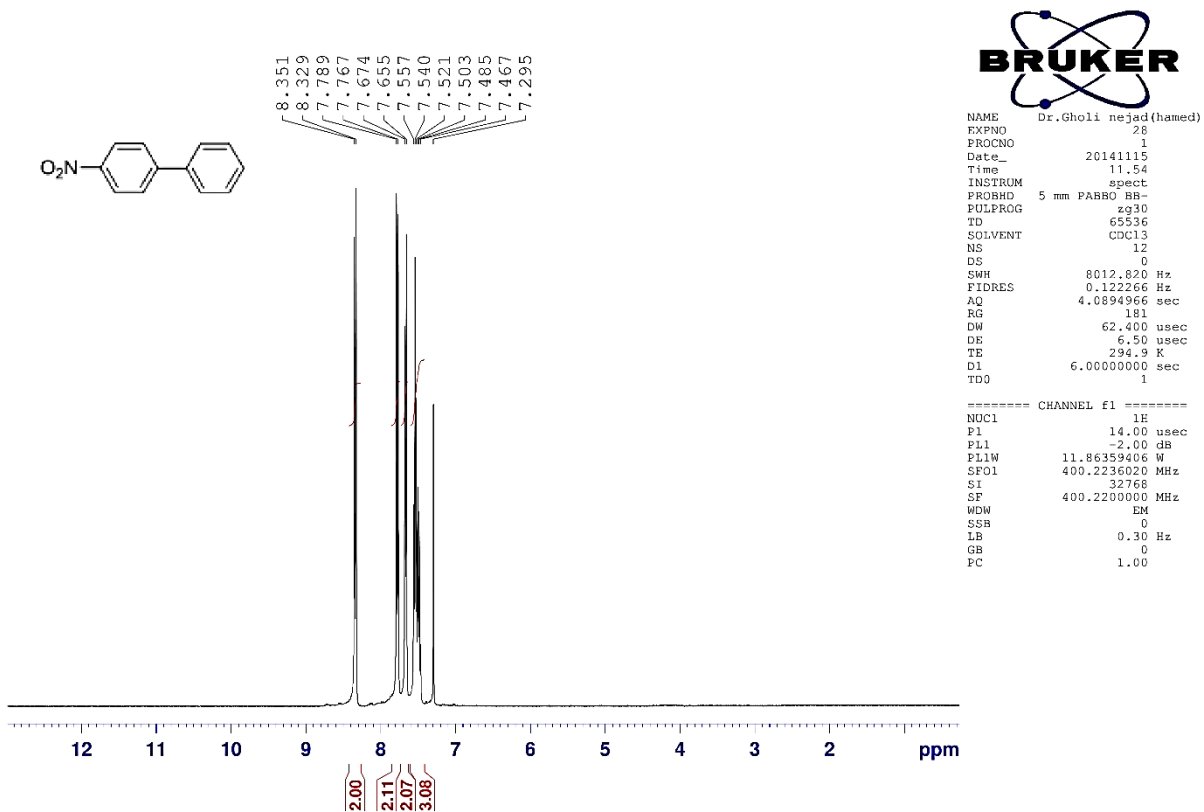

<sup>1</sup>H NMR of 4-Nitro-1,1'-biphenyl

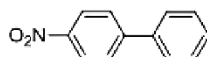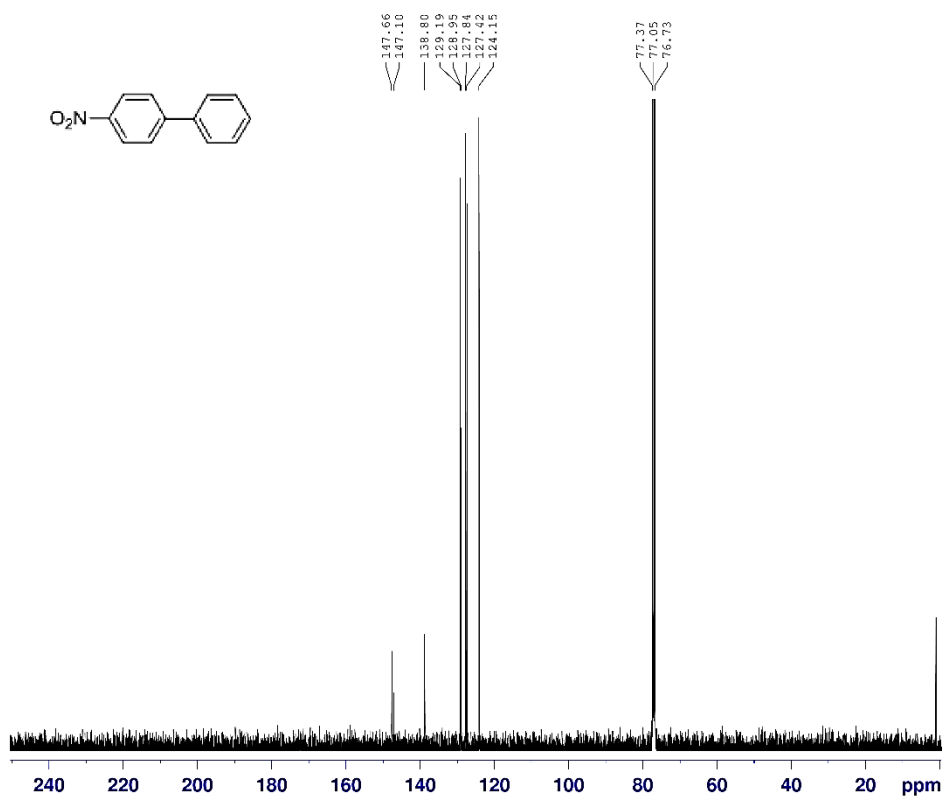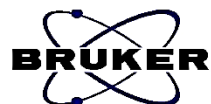

```

NAME      Dr.Gholi nejad(hamed)
EXPNO     29
PROCNO    1
Date_     20141115
Time      11.59
INSTRUM   spect
PROBHD    5 mm PABBO BB-
PULPROG   zgpg30
TD         65536
SOLVENT   CDCl3
NS         330
DS         0
SWH        25252.525 Hz
FIDRES     0.385123 Hz
AQ         1.2976629 sec
RG         2050
DW         19.800 usec
DE         6.50 usec
TE         295.2 K
D1         2.00000000 sec
D11        0.03000000 sec
TD0        1

===== CHANNEL f1 =====
NUC1       13C
P1         9.00 usec
PL1        -0.90 dB
PL1W       42.02801895 W
SFO1       100.6479784 MHz

===== CHANNEL f2 =====
CPDPRG2    waltz16
NUC2       1H
PCPD2      90.00 usec
PL2         -2.00 dB
PL12        14.16 dB
PL13        17.90 dB
PL2W       11.86359406 W
PL12W      0.28722104 W
PL13W      0.12139934 W
SFO2       400.2216009 MHz
SI         32768
SF         100.6353990 MHz
WDW        EM
SSB         0
LB         1.00 Hz
GB         0
PC         1.40

```

<sup>13</sup>C NMR of 4-Nitro-1,1'-biphenyl

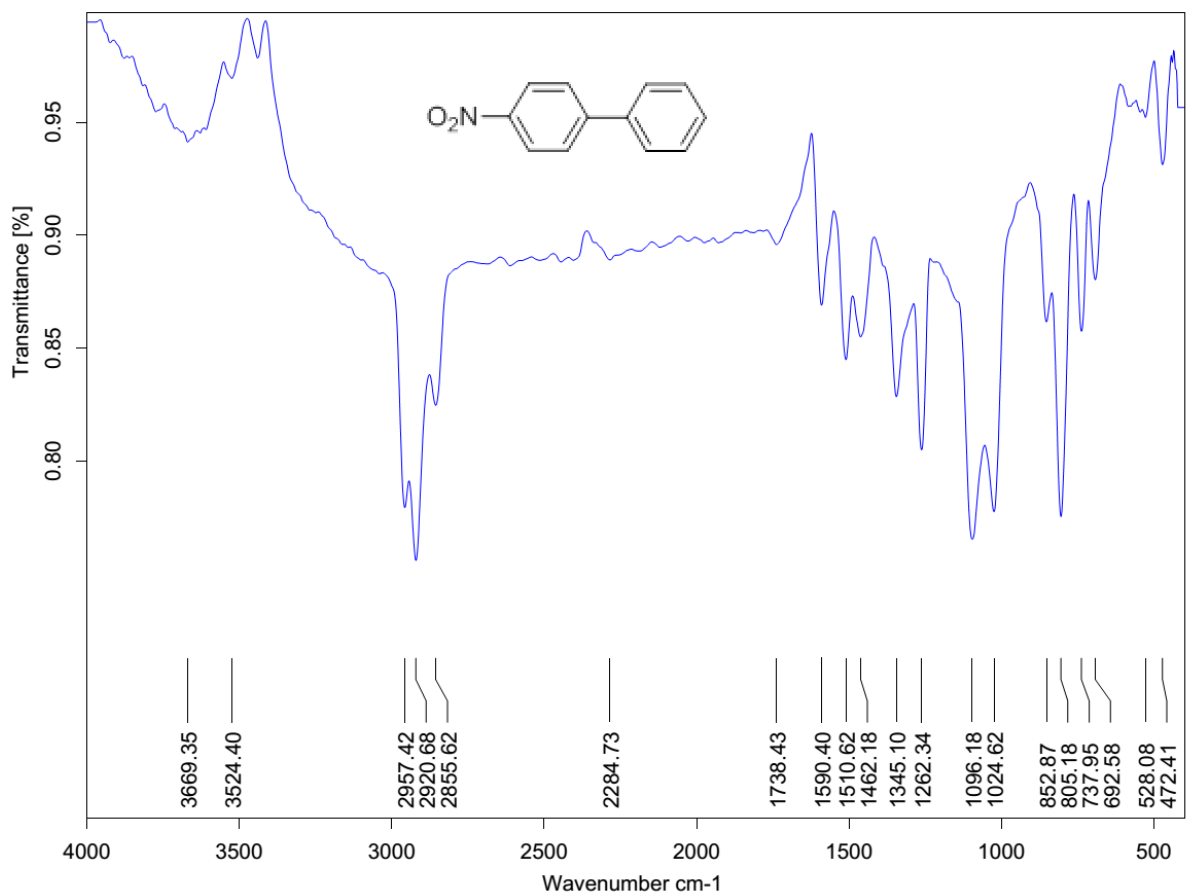

**FT-IR of 4-Nitro-1,1'-biphenyl**



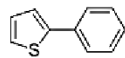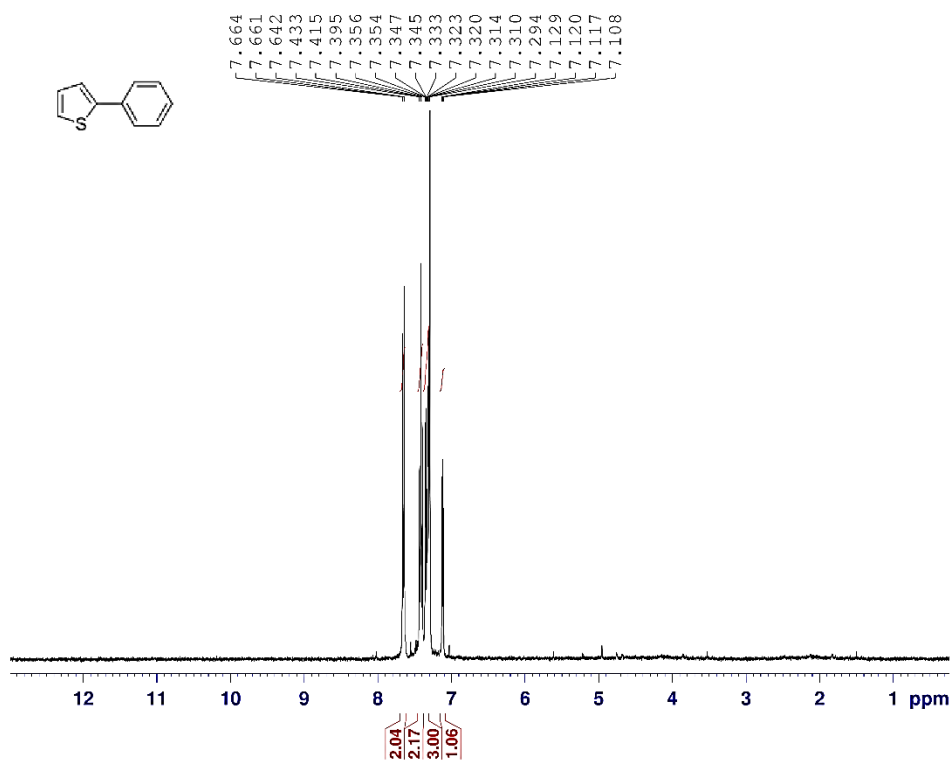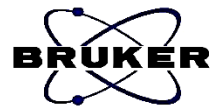

```

NAME      Dr.Gholi nejad(hamed)
EXPNO     1
PROCNO    1
Date_     20141115
Time      12.35
INSTRUM   spect
PROBHD    5 mm PABBO BB-
PULPROG   zg30
TD         65536
SOLVENT   CDCl3
NS         12
DS         0
SWH        8012.820 Hz
FIDRES     0.122266 Hz
AQ         4.0894966 sec
RG         362
EQ         62.400 usec
DE         6.50 usec
TE         294.8 K
D1         6.0000000 sec
TD0        1

===== CHANNEL f1 =====
NUC1       1H
P1         14.00 usec
PL1        -2.00 dB
P1F1W     11.86339406 W
SF01       400.2236020 MHz
SI         32768
SF         400.2200000 MHz
WDW        EM
SSB        0
LB         0.30 Hz
GB         0
PC         1.00
  
```

<sup>1</sup>H NMR of 2-phenylthiophene

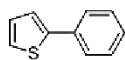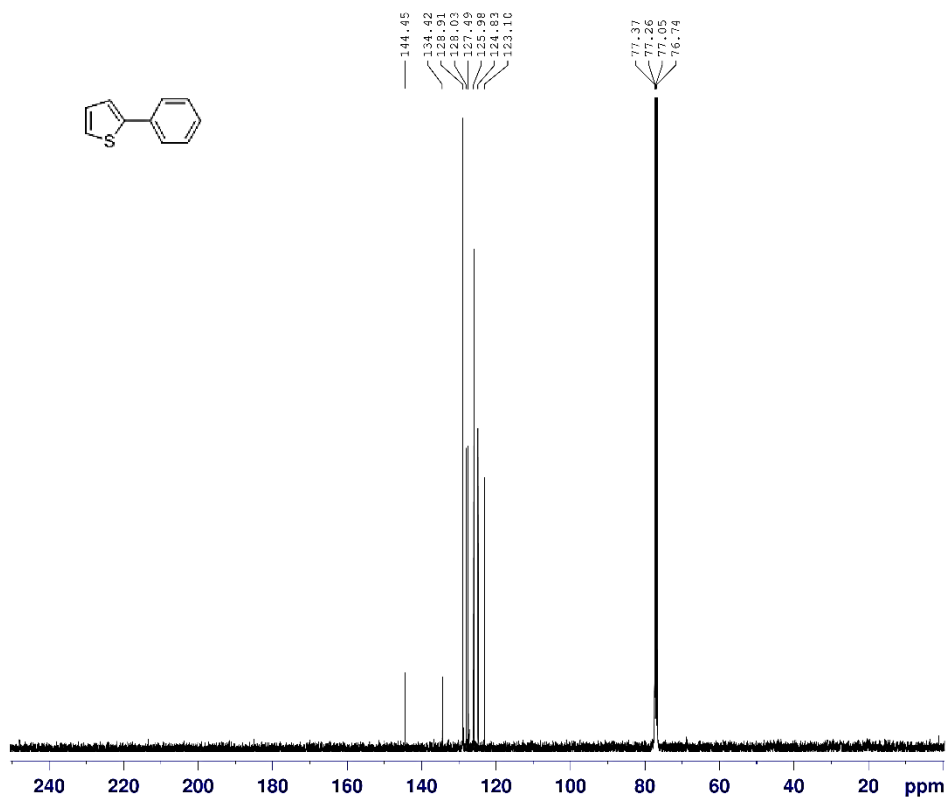

<sup>13</sup>C NMR of 2-phenylthiophene

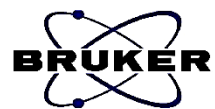

```

NAME      Dr.Gholi nejad(hamed)
EXPNO     44
PROCNO    1
Date_     20141129
Time      16.38
INSTRUM   spect
PROBHD    5 mm PABBO BB-
PULPROG   zgpg30
TD         65536
SOLVENT   CDCl3
NS         1740
DS         0
SWH       25252.525 Hz
FIDRES    0.385323 Hz
AQ         1.2976629 sec
RG         2050
DW         19.800 usec
DE         6.50 usec
TE         294.7 K
D1         2.0000000 sec
D11        0.0300000 sec
TD0        1

----- CHANNEL f1 -----
NUC1       13C
P1         9.00 usec
PL1        -0.90 dB
PL1W       42.02801895 W
SFC1       100.6479784 MHz

----- CHANNEL f2 -----
CPDPRG2    waltz16
NUC2        1H
PCPD2      90.00 usec
PL2         -2.00 dB
PL12       14.16 dB
PL13       17.90 dB
PL2W       11.86359406 W
PL12W      0.28722104 W
PL13W      0.12139934 W
SFC2       400.2216009 MHz
SI         32768
SF         100.6353990 MHz
WDW        EM
SSB         0
LB         1.00 Hz
GB         0
PC         1.40

```

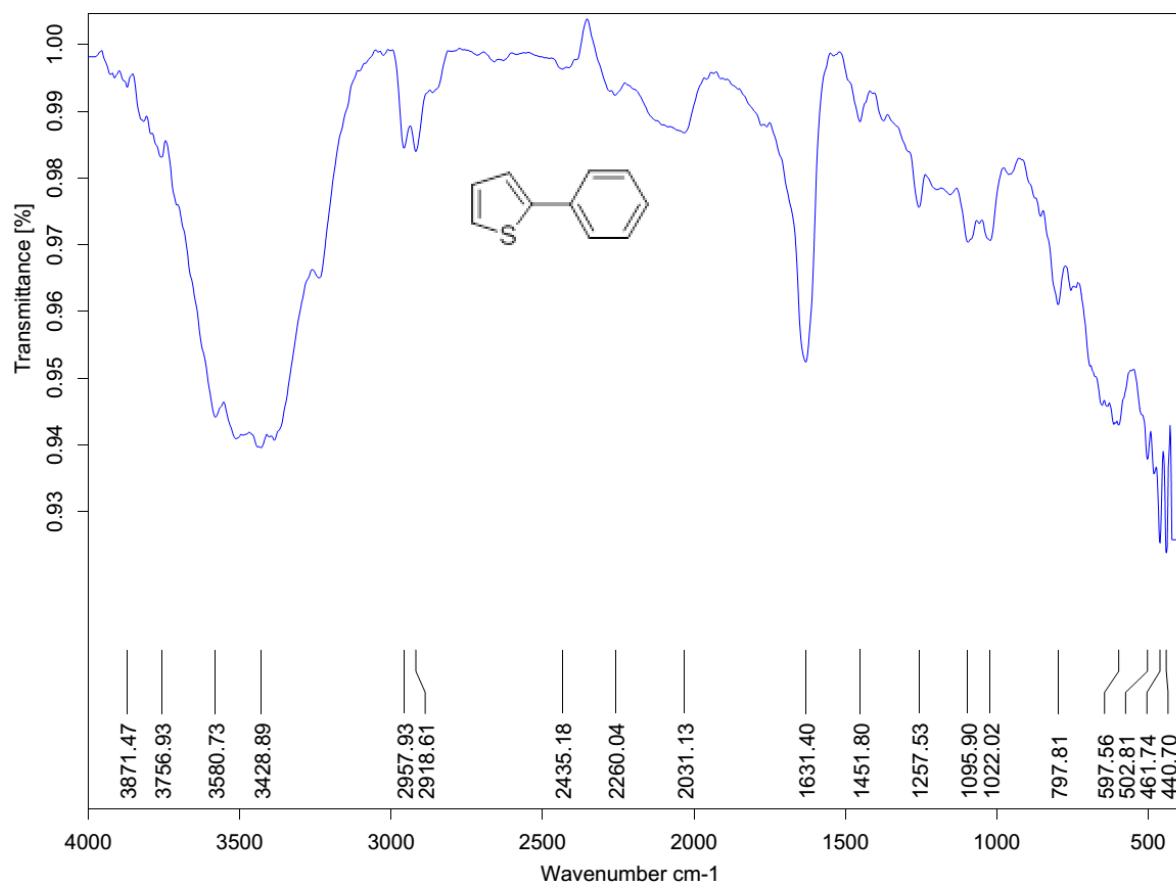

**FT-IR of 2-phenylthiophene**

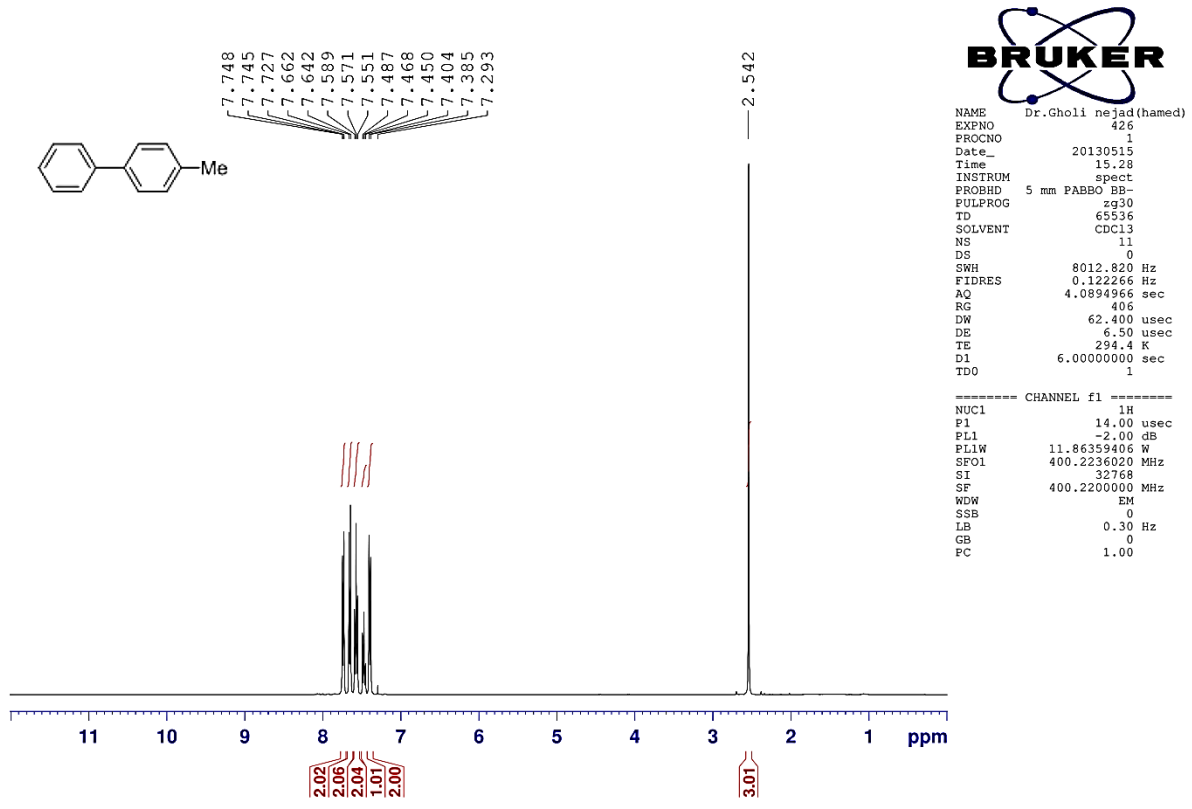

**<sup>1</sup>H NMR of 4-methyl-1,1'-biphenyl**

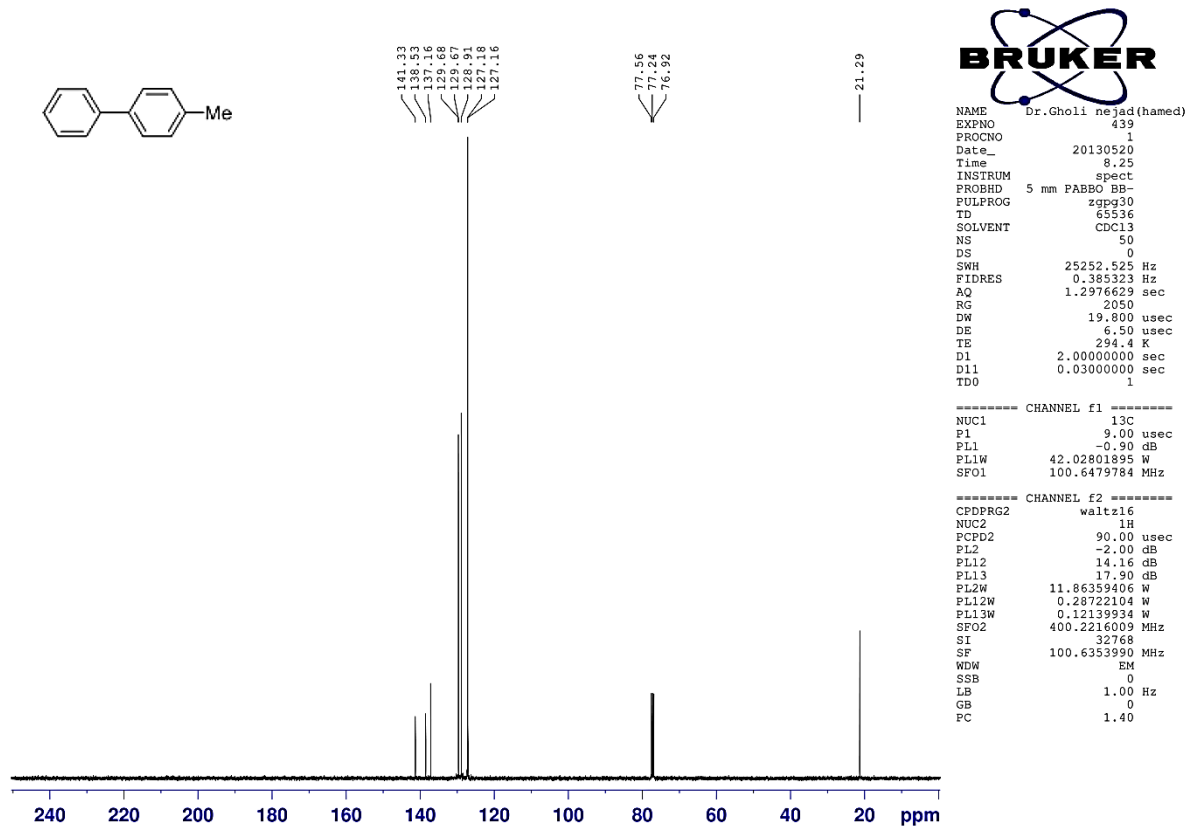

<sup>13</sup>C NMR of 4-methyl-1,1'-biphenyl

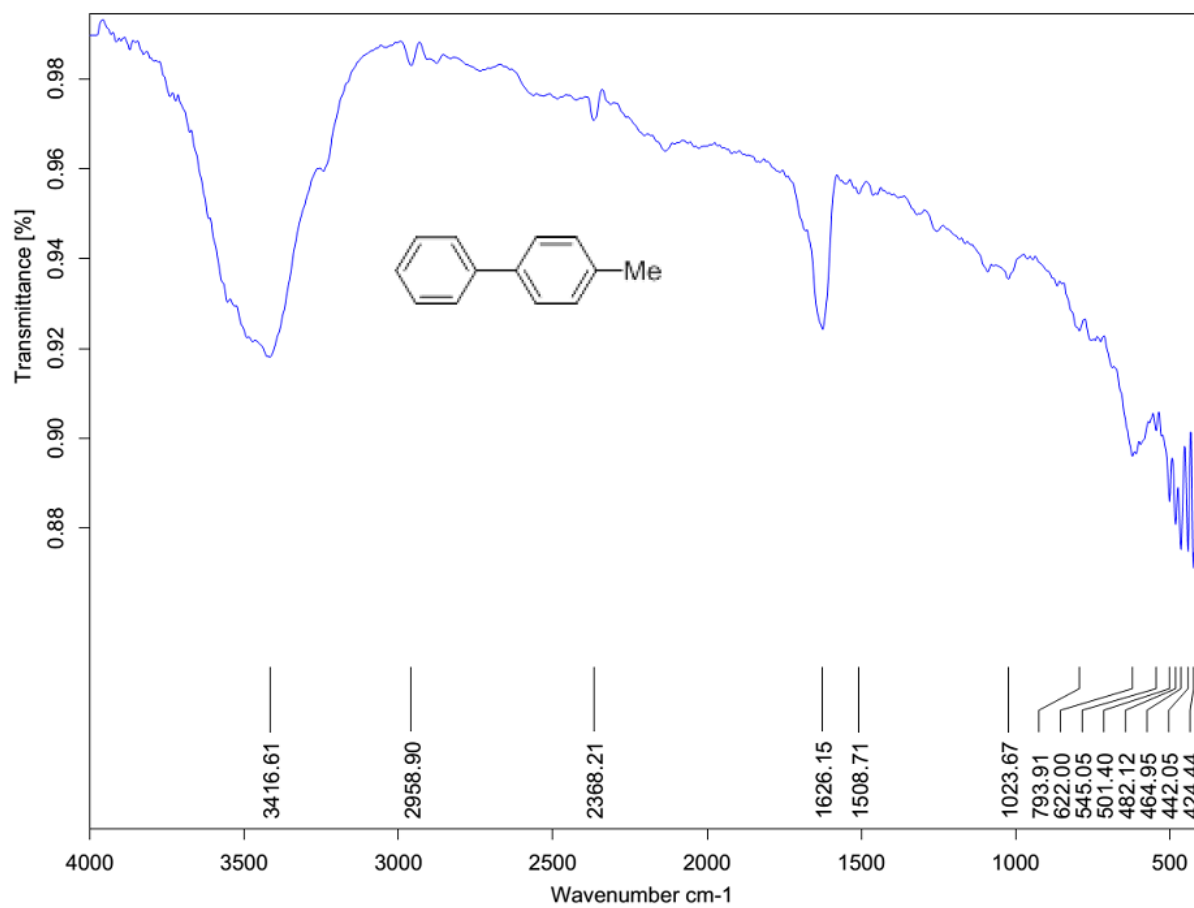

**FT-IR of 4-methyl-1,1'-biphenyl**

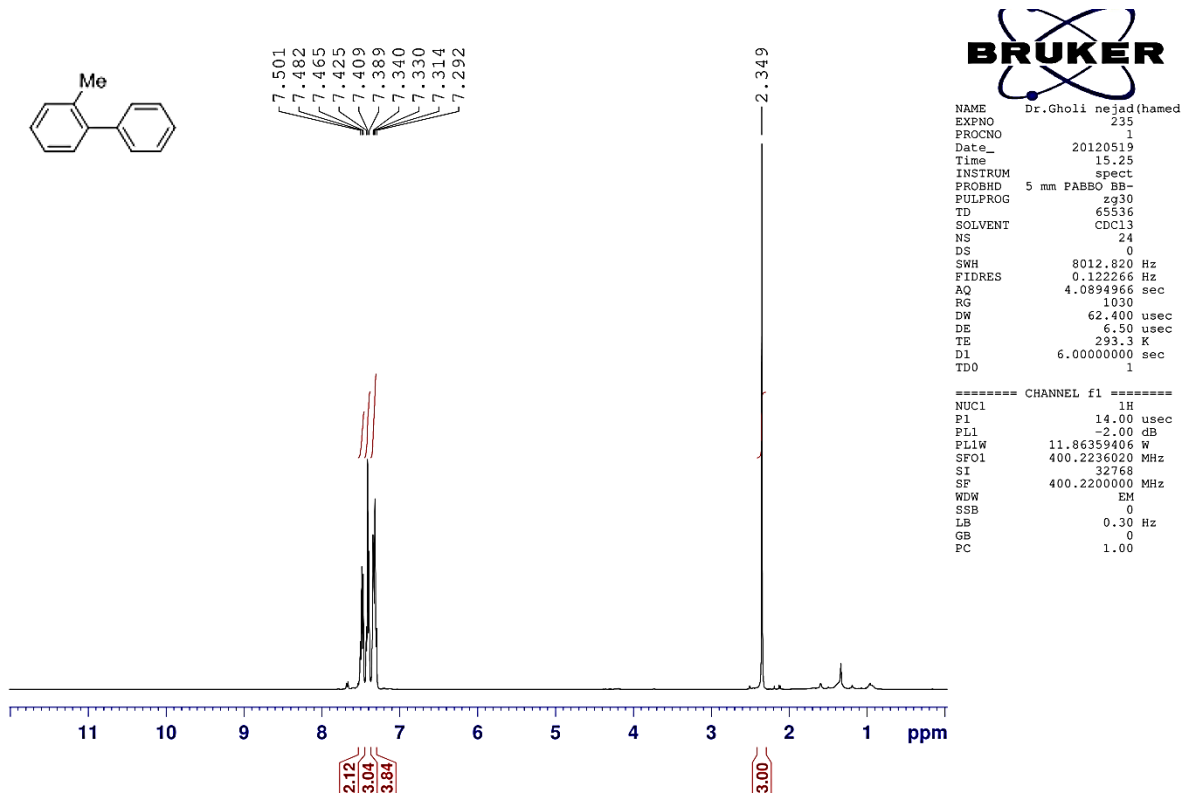

**<sup>1</sup>H NMR of 2-methyl-1,1'-biphenyl**

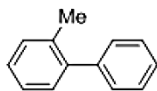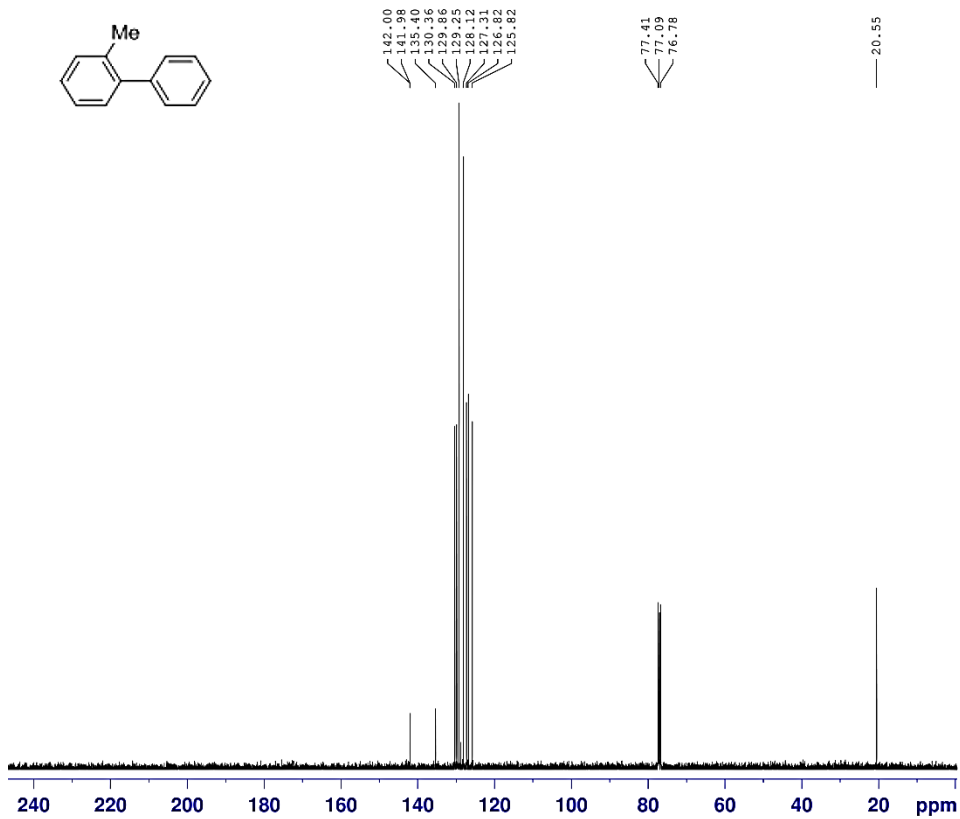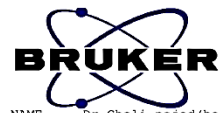

Dr.Gholi nejad (hamed)

```

NAME      Dr.Gholi nejad (hamed)
EXFNO    236
PROCNO    1
Date_    20120519
Time      15.29
INSTRUM   spect
PROBHD    5 mm PABBO BB-
PULPROG   zgpg
TD         65536
SOLVENT   CDCl3
NS         50
DS         0
SWH       25252.525 Hz
FIDRES    0.385323 Hz
AQ         1.2976629 sec
RG         2050
DW         19.800 usec
DE         6.50 usec
TE         293.7 K
D1         3.00000000 sec
D11        0.03000000 sec
TDO        1

===== CHANNEL f1 =====
NUC1      13C
P1         9.00 usec
PL1        -0.90 dB
PL1W      42.02801895 W
SFO1      100.6479784 MHz

===== CHANNEL f2 =====
CPDPRG2   waltz16
NUC2       1H
PCPD2     90.00 usec
PL2        -2.00 dB
PL12      14.16 dB
PL13      17.90 dB
PL2W     11.86359406 W
PL12W     0.28722104 W
PL13W     0.12139934 W
SFO2      400.2216009 MHz
SI         32768
SF         100.6353990 MHz
WDW        EM
SSB         0
LB          1.00 Hz
GB           0
PC           1.40

```

<sup>13</sup>C NMR of 2-methyl-1,1'-biphenyl



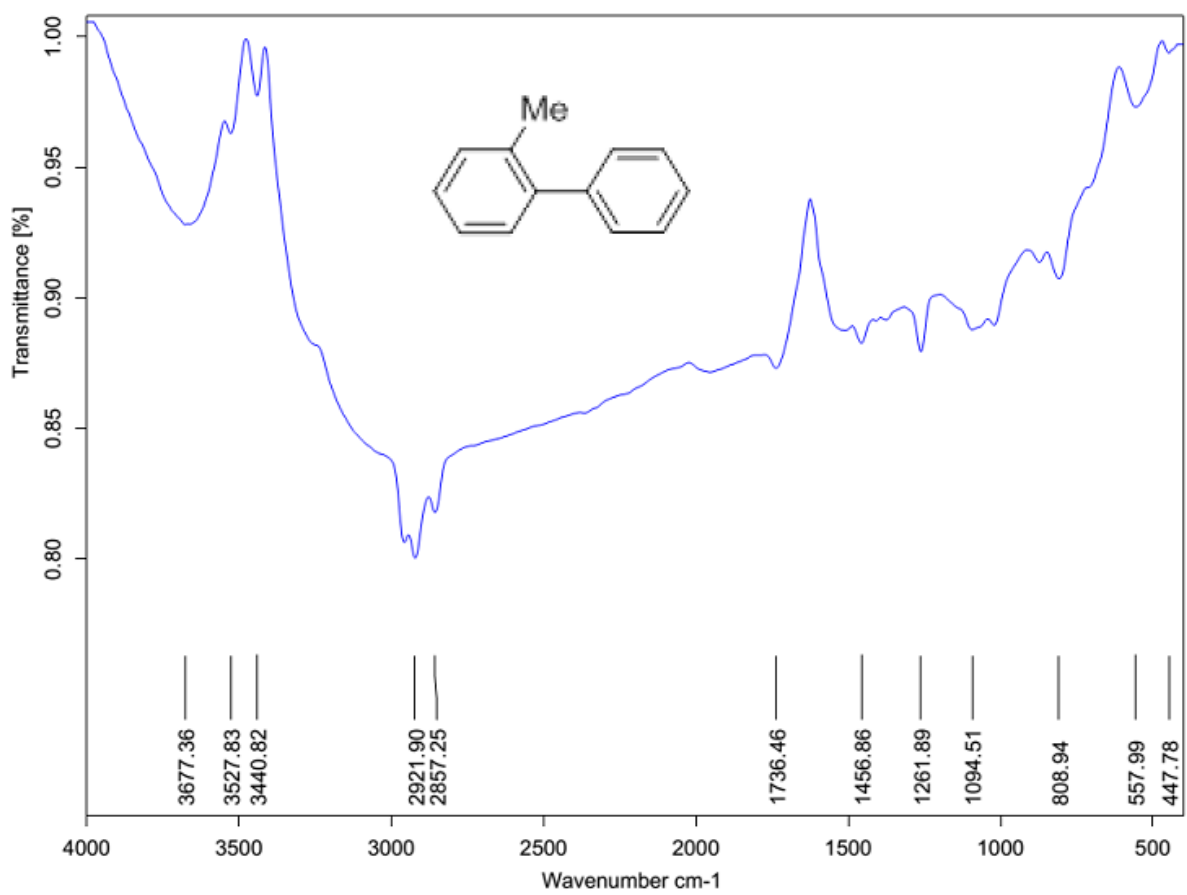

**FT-IR of 2-methyl-1,1'-biphenyl**

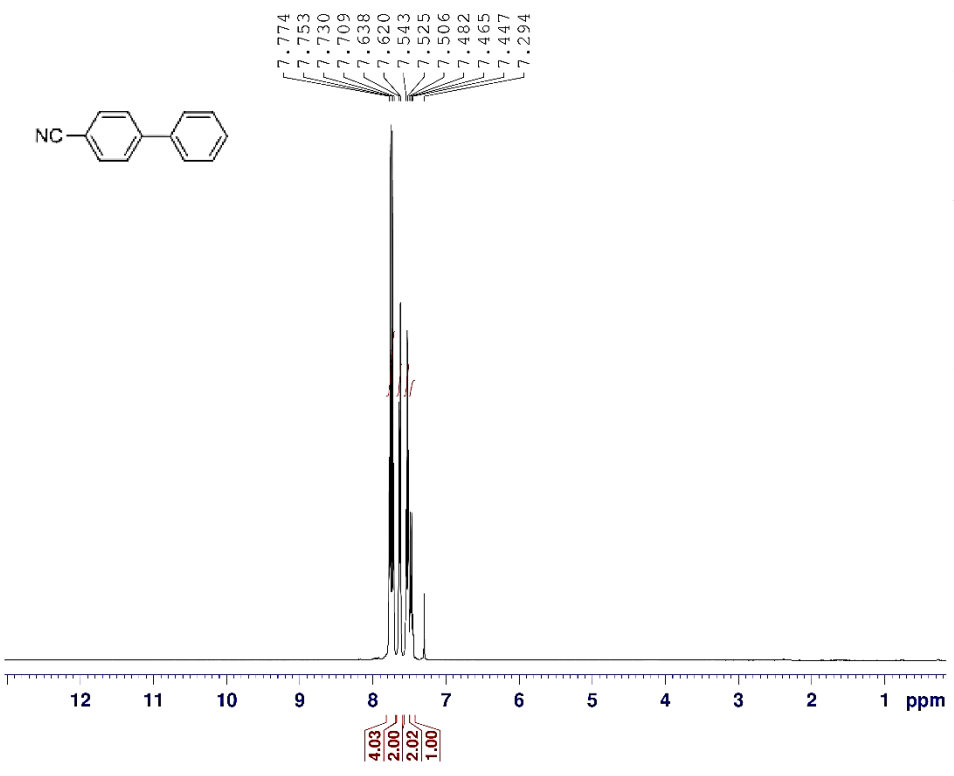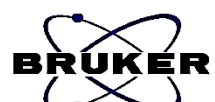

```

NAME      Dr.Gholi nejhd(hamed)
EXPNO     56
PROCNO    1
Date_     20150131
Time      10.57
INSTRUM   spect
PROBHD    5 mm PA3BO BB-
PULPROG   zg30
TD         65536
SOLVENT   CDCl3
NS         6
DS         0
SWH        8012.820 Hz
FIDRES     0.122266 Hz
AQ         4.0894966 sec
RG         114
DW         62.400 usec
DE         6.50 usec
TE         294.8 K
D1         6.00000000 sec
TD0        1

===== CHANNEL f1 =====
NUC1      1H
P1        14.00 usec
PL1       -2.00 dB
PL1W      11.86359406 W
SFO1      400.2236020 MHz
SI         32768
SF         400.2200000 MHz
WDW        EM
SSB        0
LB         0.30 Hz
GB         0
PC         1.00

```

<sup>1</sup>H NMR of [1,1'-biphenyl]-4-carbonitrile

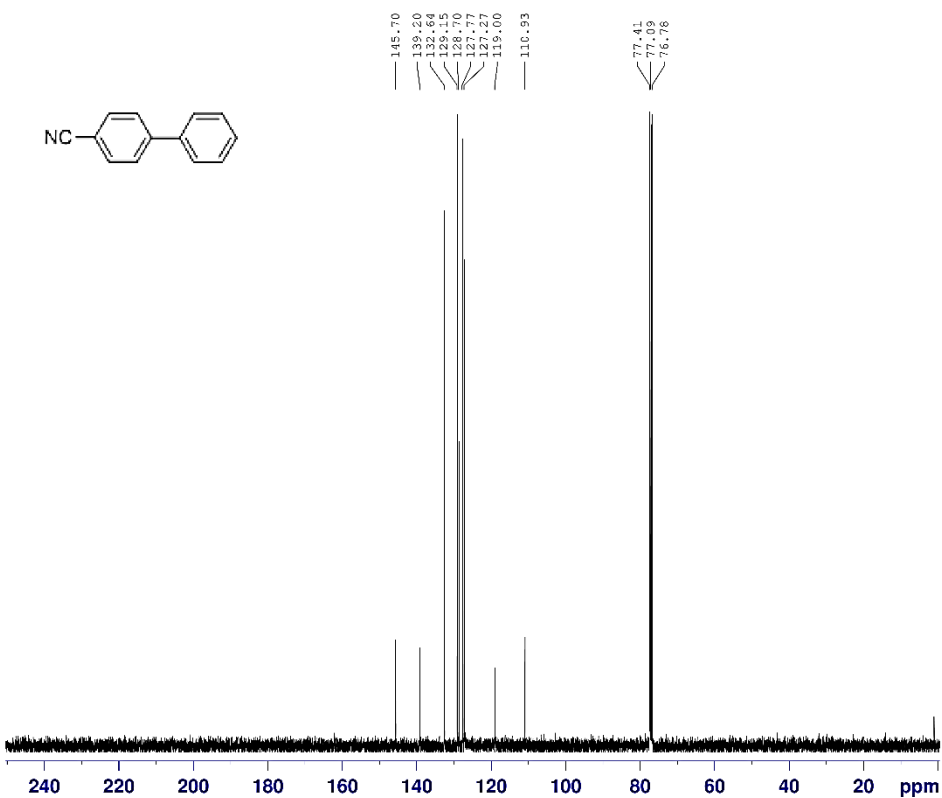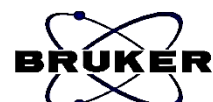

Dr.Gholi nejad(hamed)

```

NAME
EXENO 57
PROCNO 1
Date_ 20150131
Time 11.01
INSTRUM spect
PROBHD 5 mm PABBO B3-
PULPROG zgpg30
TD 65536
SOLVENT CDCl3
NS 80
DS 0
SRH 25252.525 Hz
FIDRRS 0.385323 Hz
AQ 1.2976629 sec
RG 2050
DW 19.800 usec
DE 6.50 usec
TE 295.1 K
D1 2.0000000 sec
D11 0.0300000 sec
TD0 1

===== CHANNEL f1 =====
NUC1 13C
P1 9.00 usec
PL1 -0.90 dB
PLLW 42.02801895 W
SFO1 100.6479784 MHz

===== CHANNEL f2 =====
CPDPRG2 waltz16
NUC2 1H
PCPD2 90.00 usec
PL2 -2.00 dB
PL12 14.16 dB
PL13 17.90 dB
PL2W 11.86359406 W
PL12W 0.28722104 W
PL13W 0.12139934 W
SFO2 400.2216009 MHz
SI 32768
SF 100.6353990 MHz
NDW EM
SSB 0
LB 1.00 Hz
GB 0
PC 1.40

```

<sup>13</sup>C NMR of [1,1'-biphenyl]-4-carbonitrile

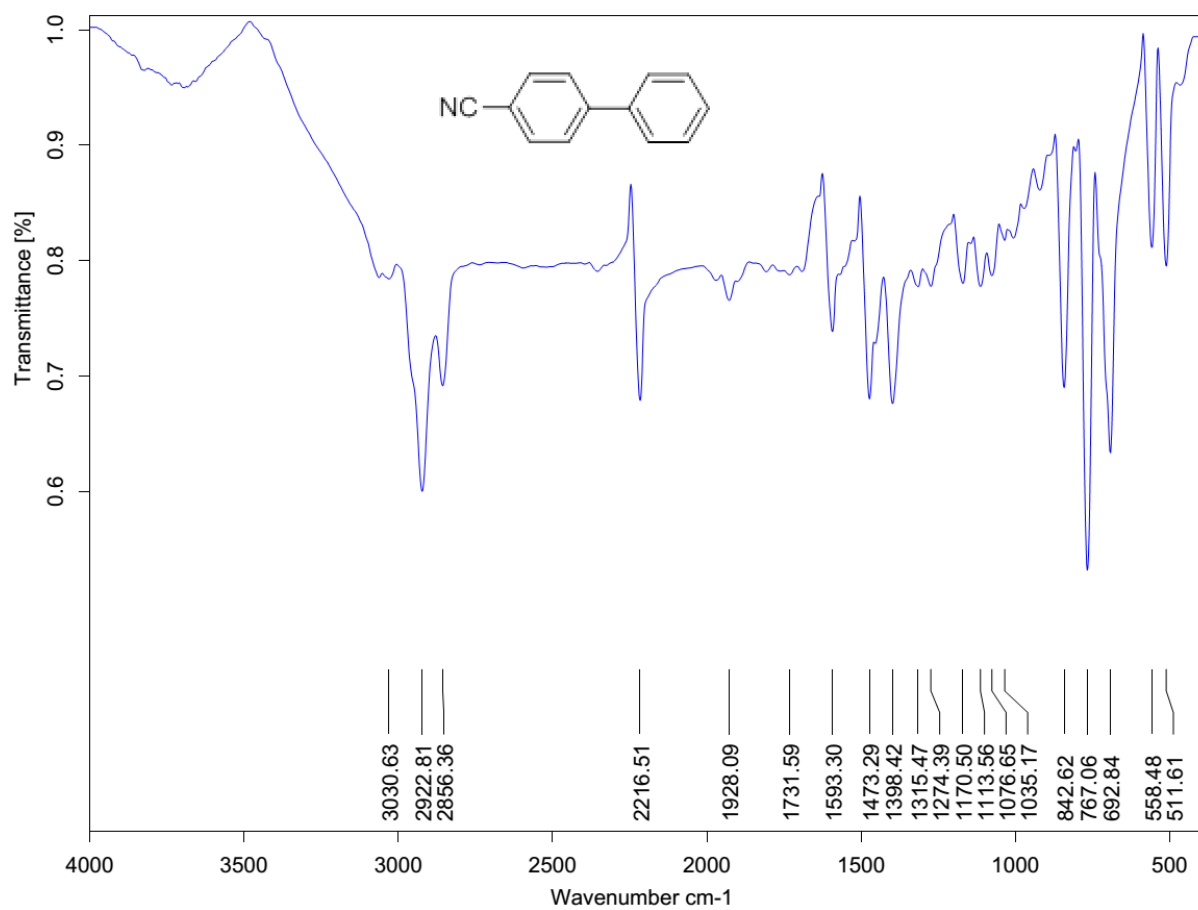

**FT-IR of [1,1'-biphenyl]-4-carbonitrile**

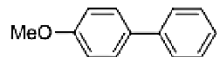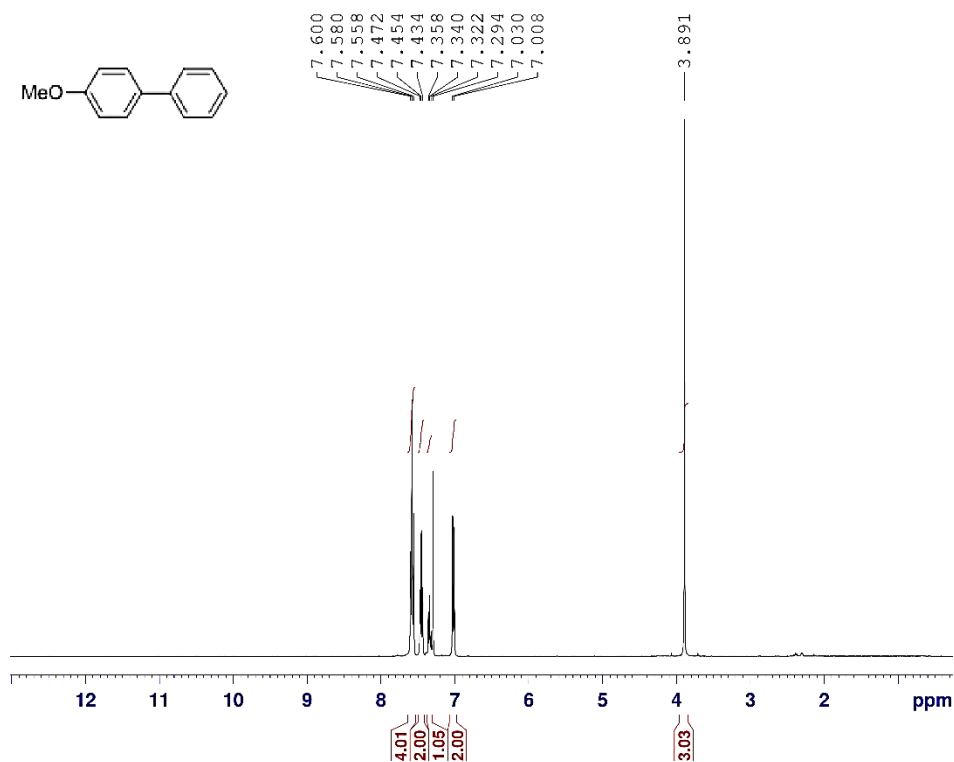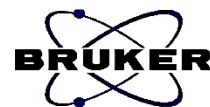

```

NAME      Dr.Gholi nejad (hamed)
EXPNO     26
PROCNO    1
Date_     20141115
Time      11.20
INSTRUM   spect
PROBHD    5 mm PABBO BB-
PULPROG   zg30
TD        65536
SOLVENT   CDCl3
NS        12
DS        0
SWH       8012.820 Hz
FIDRES    0.122266 Hz
AQ        4.0894966 sec
RG        181
DW        62.400 usec
DE        6.50 usec
TE        295.2 K
D1        6.0000000 sec
TDO       1

===== CHANNEL f1 =====
NUC1      1H
P1        14.00 usec
PL1       -2.00 dB
PL1W      11.86359406 W
SFO1      400.2236020 MHz
SI        32768
SF        400.2200000 MHz
WDW       EM
SSB       0
LB        0.30 Hz
GB        0
PC        1.00
  
```

<sup>1</sup>H NMR of 4-Methoxy-1,1'-biphenyl

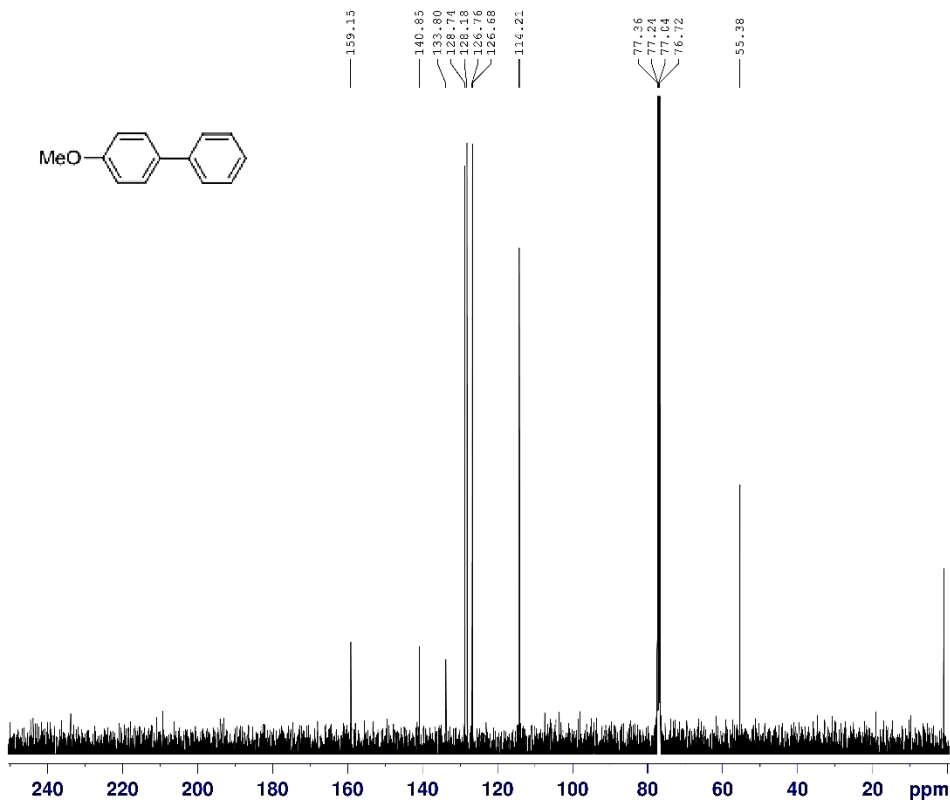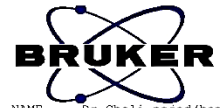

```

NAME          Dr. Gholi nejad (hamed)
EXPNO         6.27
PROCNO        1
Date_         20141115
Time         11.25
INSTRUM       spect
PROBHD        5 mm PABBO BB-
PULPROG       zgpg30
ID            65536
SOLVENT       CDCl3
NS            430
DS            0
SWH           25252.525 Hz
FIDRES        0.385323 Hz
AQ            1.2976629 sec
RC            2050
Dw            19.800 usec
DE            6.50 usec
TE            295.5 K
D1            2.0000000 sec
D11           0.0300000 sec
TD0           1

===== CHANNEL f1 =====
NUC1          13C
P1            9.00 usec
PL1           -0.90 dB
PL1W          42.02801895 W
SF01          100.6479784 MHz

===== CHANNEL f2 =====
CPDPRG2       waltz16
NUC2          1H
PCPD2         90.00 usec
PL2           -2.00 dB
PL12          14.16 dB
PL13          17.90 dB
PL2W          11.86359406 W
PL12W         0.28722104 W
PL13W         0.12139934 W
SF02          400.2216009 MHz
SI            32768
SF            100.6353990 MHz
WDW           EM
SSB           0
LB            1.00 Hz
GB            0
PC            1.40

```

<sup>13</sup>C NMR of 4-Methoxy-1,1'-biphenyl

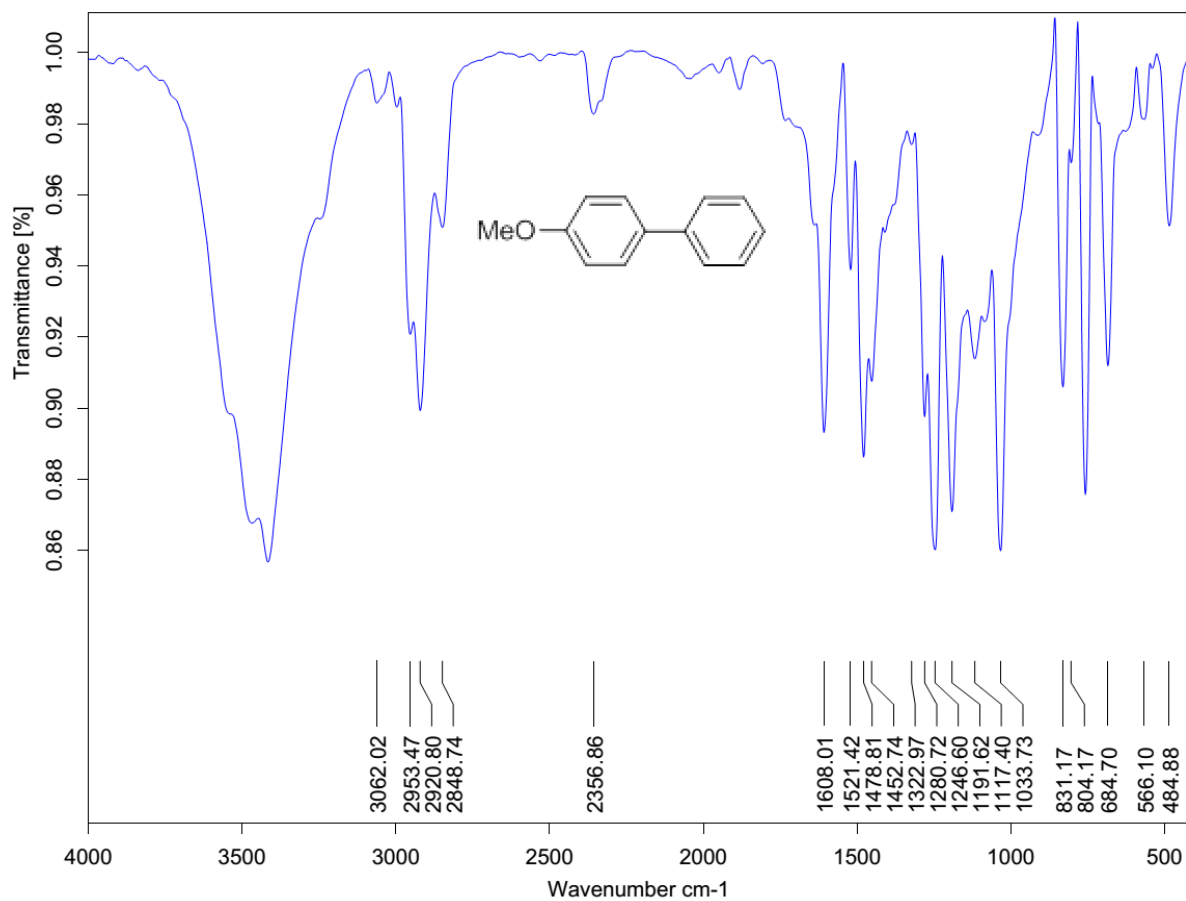

**FT-IR of 4-Methoxy-1,1'-biphenyl**

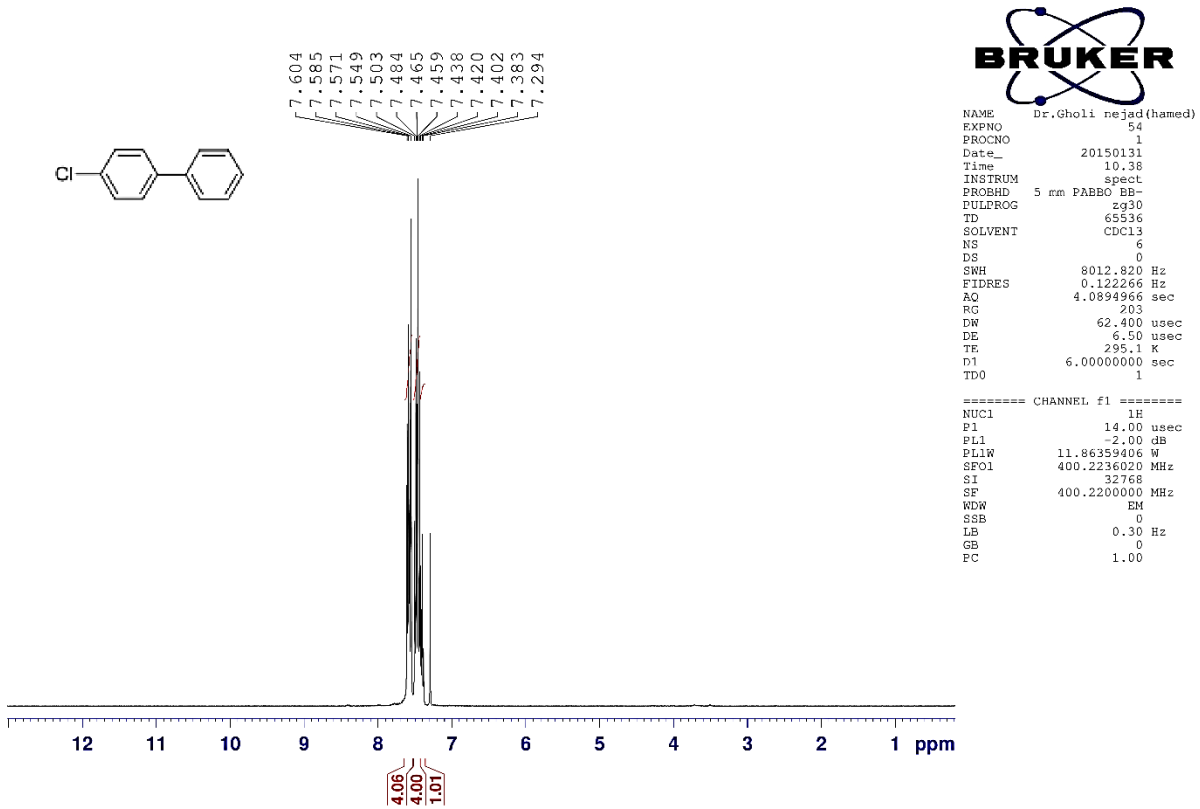

<sup>1</sup>H NMR of 4-chloro-1,1'-biphenyl



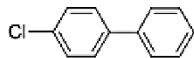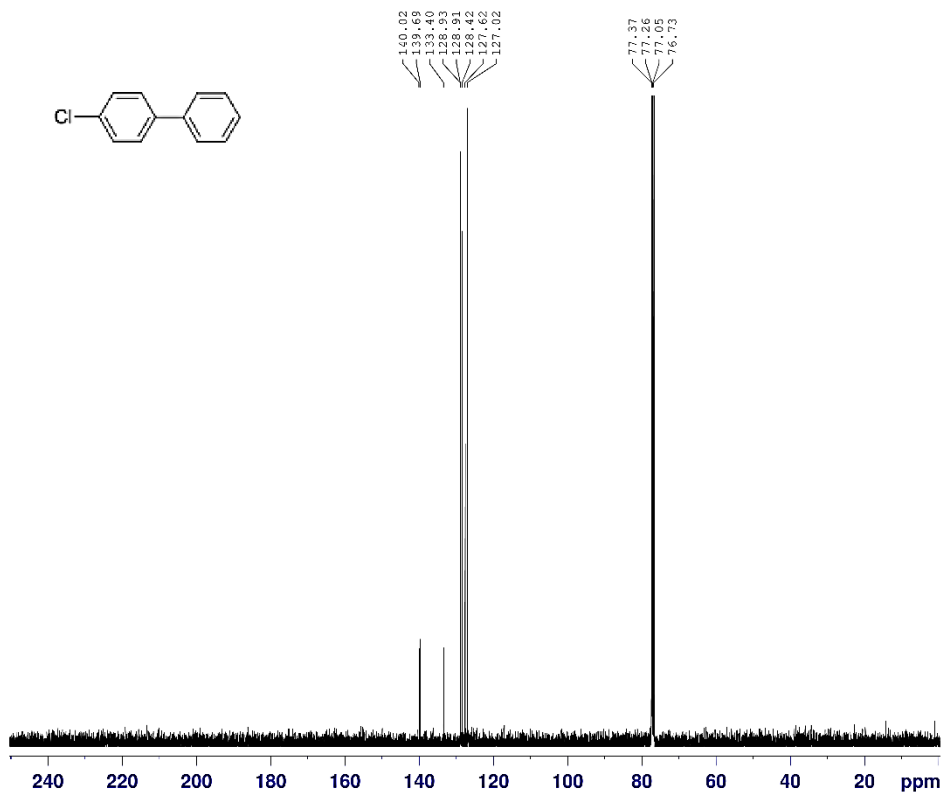

<sup>13</sup>C NMR of 4-chloro-1,1'-biphenyl

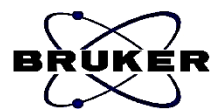

```

NAME      Dr.Gholi nejad (hamed)
EXPNO     55
PROCNO    1
Date_     20150131
Time      10.41
INSTRUM   spect
PROBHD    5 mm PABBO BB-
PULPROG   zgpg30
TD         65536
SOLVENT   CDCl3
NS         212
DS         0
SWH        25252.525 Hz
FIDRES     0.385323 Hz
AQ         1.2976629 sec
RG         2050
DW         19.800 usec
DE         6.50 usec
TE         295.3 K
D1         2.00000000 sec
D11        0.03000000 sec
TD0        1

===== CHANNEL f1 =====
NUC1       13C
P1         9.00 usec
PL1        -0.90 dB
PL1W       42.02801895 W
SFO1       100.6479784 MHz

===== CHANNEL f2 =====
CPDPRG2    waltz16
NUC2       1H
PCPD2      90.00 usec
P12        -2.00 dB
PL12       14.16 dB
PL13       17.90 dB
P12W       11.86359406 W
PL12W      0.28722104 W
PL13W      0.12139934 W
SFO2       400.2216009 MHz
SI         32768
SF         100.6353990 MHz
WDW        EM
SSB        0
LB         1.00 Hz
GB         0
PC         1.40

```

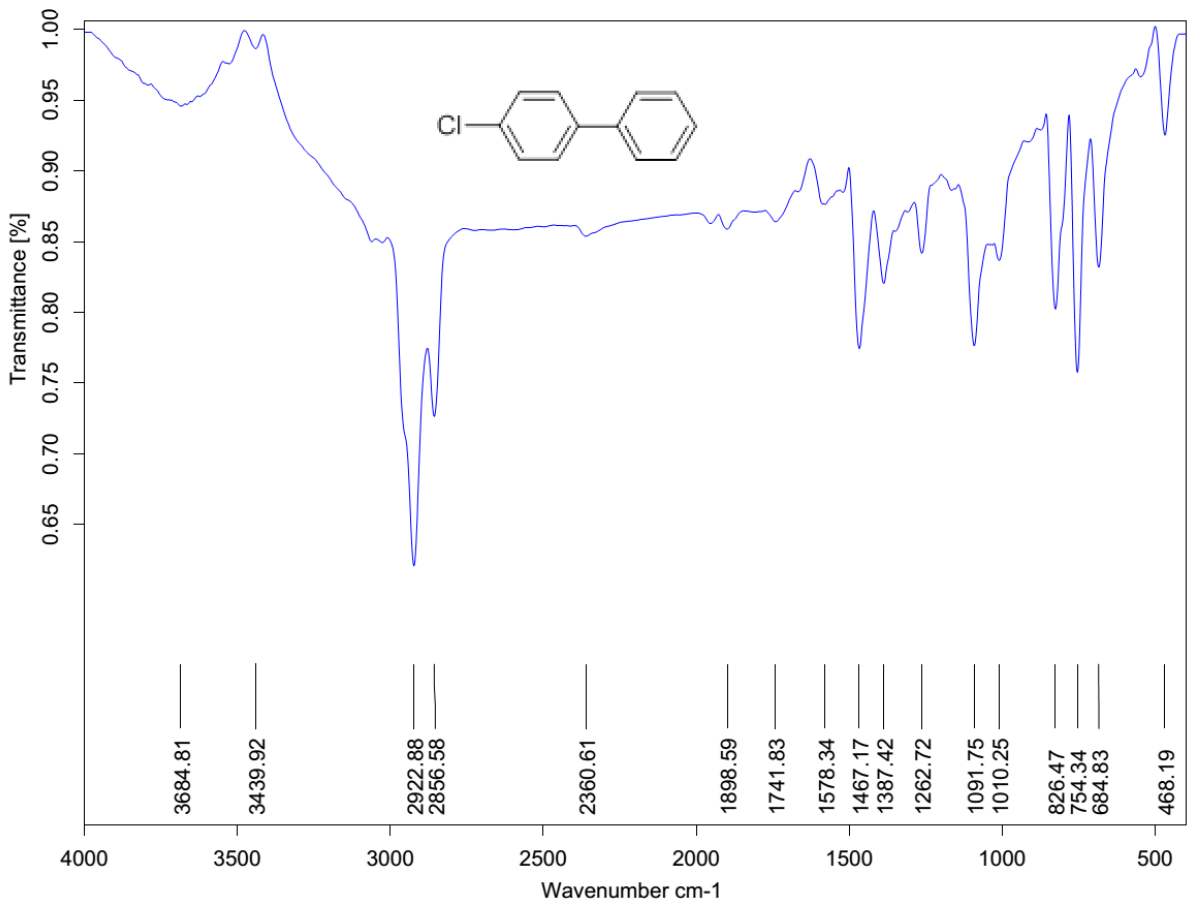

**FT-IR of 4-chloro-1,1'-biphenyl**

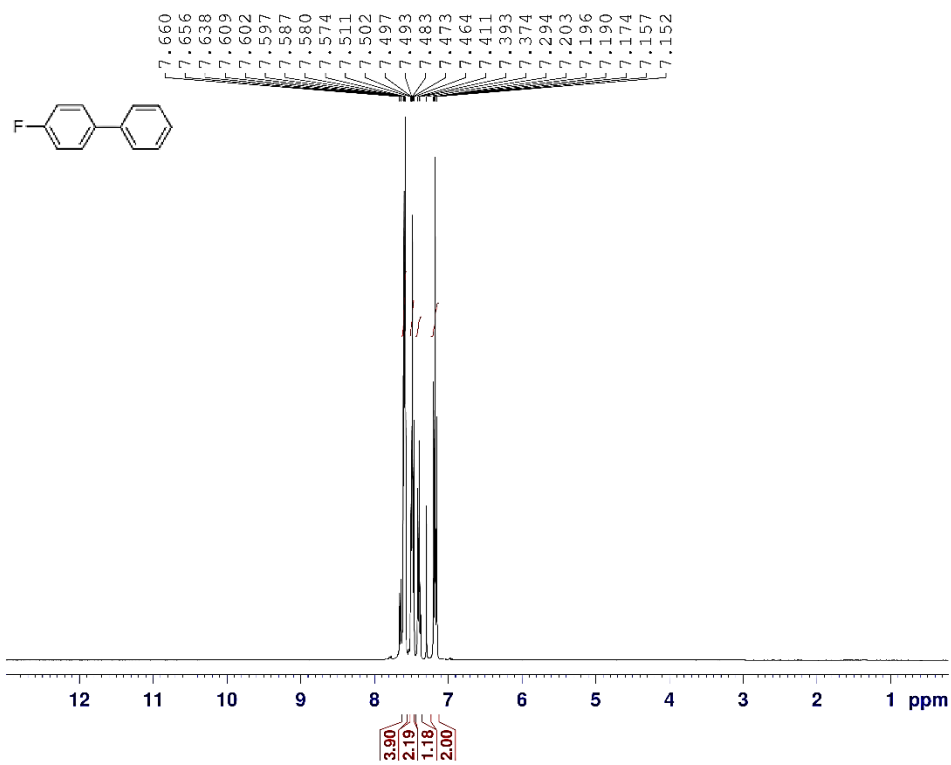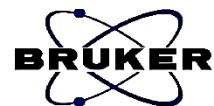

```

NAME          Dr.Gholi nejad (hamed)
EXPNO         82
PROCNO        1
Date_         20150304
Time         12.09
INSTRUM       spect
PROBHD        5 mm PARBO RB-
PULPROG       zg30
TD            65536
SOLVENT       CDCl3
NS            12
DS            0
SWH           8012.820 Hz
FIDRES        0.122266 Hz
AQ            4.0894966 sec
RG            128
DW            62.400 usec
DE            6.50 usec
TE            294.7 K
D1            6.00000000 sec
TDO           1

----- CHANNEL f1 -----
NUC1          1H
P1            14.00 usec
PL1           -2.00 dB
PL1W         11.86359406 W
SF01          400.2236020 MHz
SI            32768
SF            400.2200000 MHz
WDW           EM
SSB           0
LB            0.30 Hz
GB            0
PC            1.00

```

<sup>1</sup>H NMR of 4-fluoro-1,1'-biphenyl

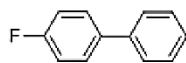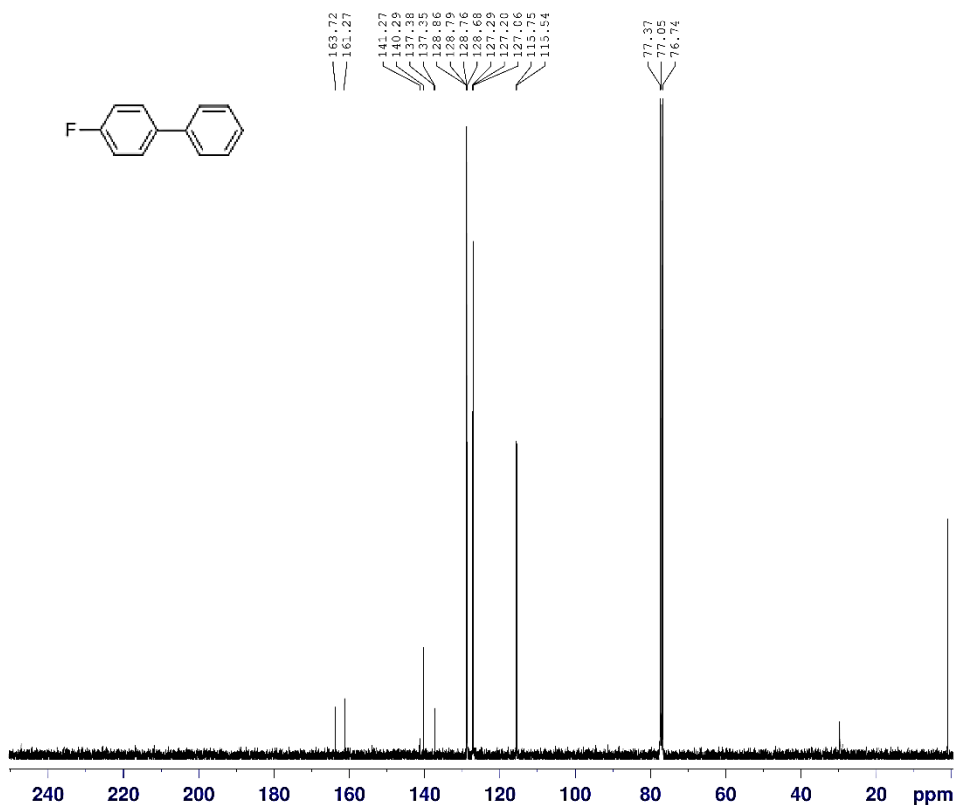

<sup>13</sup>C NMR of 4-fluoro-1,1'-biphenyl

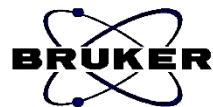

```

NAME      Dr.Gholi nejad (hamed)
EXPNO     83
PROCNO    1
Date_     20150304
Time      12.14
INSTRUM   spect
PROBHD    5 mm PABBO BB-
PULPROG   zgpg30
TD        65536
SOLVENT   CDCl3
NS        270
DS        0
SWH       25252.525 Hz
FIDRES    0.385323 Hz
AQ        1.2976629 sec
RG        2050
DW        19.800 usec
DE        6.50 usec
TE        295.0 K
D1        2.0000000 sec
D11       0.0300000 sec
TD0       1

----- CHANNEL f1 -----
NUC1      13C
P1        9.00 usec
PL1       -0.90 dB
PL1W     42.02801895 W
SF01     100.6479784 MHz

----- CHANNEL f2 -----
CPDPRG2   waltz16
NUC2      1H
PCPD2     90.00 usec
PL2       -2.00 dB
PL12     14.16 dB
PL13     17.90 dB
PL2W     11.86359406 W
PL12W    0.28722104 W
PL13W    0.12139934 W
SF02     400.2216009 MHz
SI        32768
SF        100.6353990 MHz
WDW       EM
SSB       0
LB        1.00 Hz
GB        0
PC        1.40

```

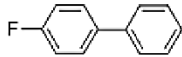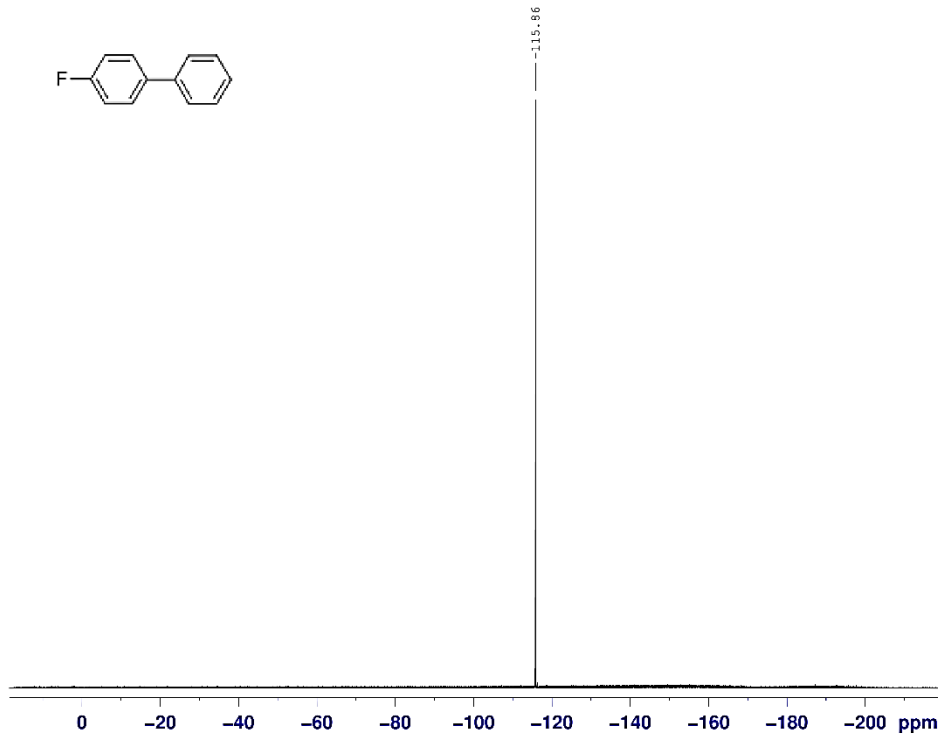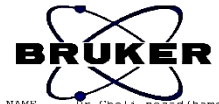

```

NAME      Br.Gh6L1 nejad(hamed)
EXPNO     108
PROCNO    1
Date_     20150408
Time      15.50
INSTRUM   spect
PROBHD    5 mm PABBO BB-
PULPROG   zgfhigqp
TD        131072
SOLVENT   CDCl3
NS        11
DS        0
SWH       89285.711 Hz
FIDRES    0.681196 Hz
AQ        0.7340532 sec
RG        2050
DW        5.600 usec
DE        6.50 usec
TE        295.0 K
D1        1.00000000 sec
D11       0.03000000 sec
D12       0.00002000 sec
TD0       1

===== CHANNEL f1 =====
NUC1      19F
P1        14.00 usec
PL1       -2.40 dB
PL1W     14.31771946 W
SFO1     376.5453925 MHz

===== CHANNEL f2 =====
CPDPRG2   waltz16
NUC2      1H
PCPD2     90.00 usec
PL2       -2.00 dB
PL12     14.48 dB
PL2W     11.86359406 W
PL12W    0.26681873 W
SFO2     400.2216009 MHz
SI        65536
SF        376.5830510 MHz
WDW       EM
SSB       0
LB        0.30 Hz
GB        0
PC        1.00

```

<sup>19</sup>F NMR of 4-fluoro-1,1'-biphenyl

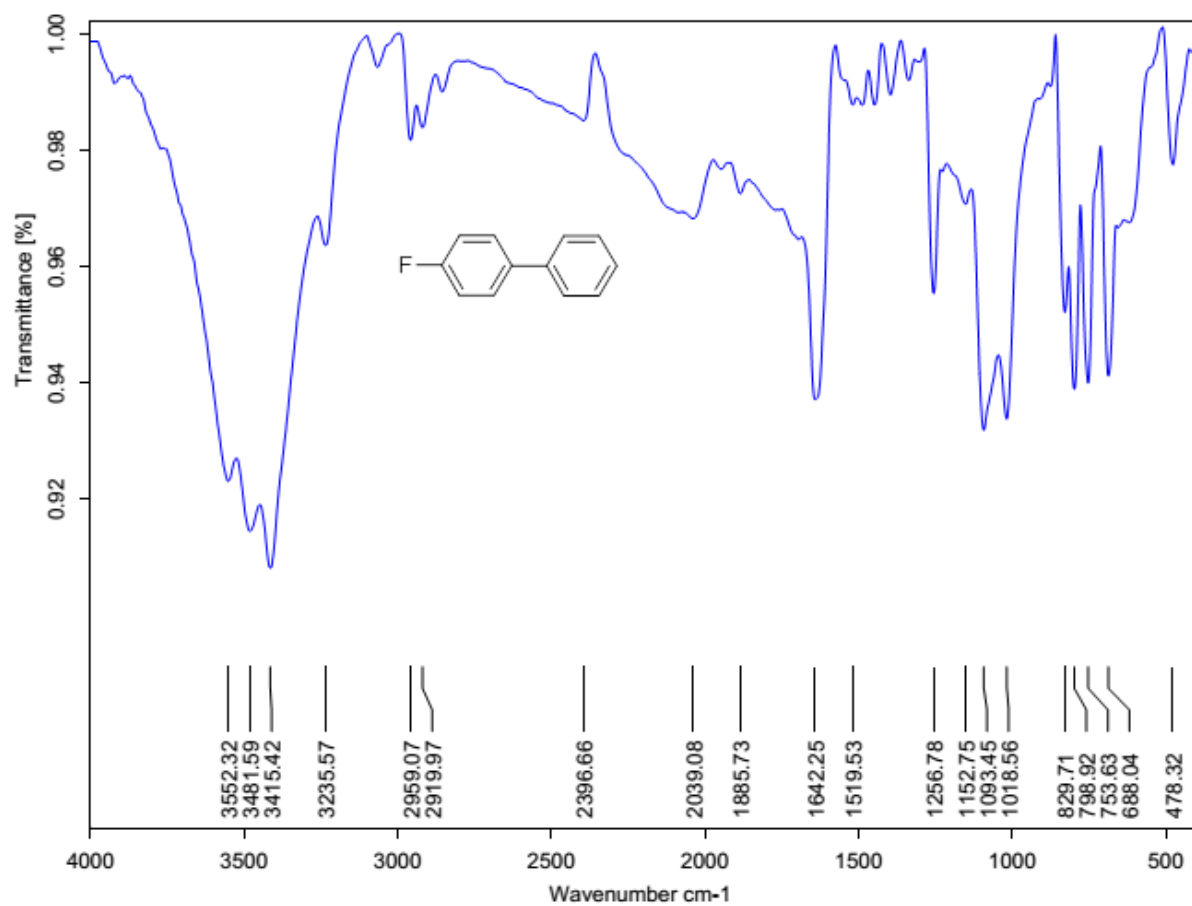

**FT-IR of 4-fluoro-1,1'-biphenyl**

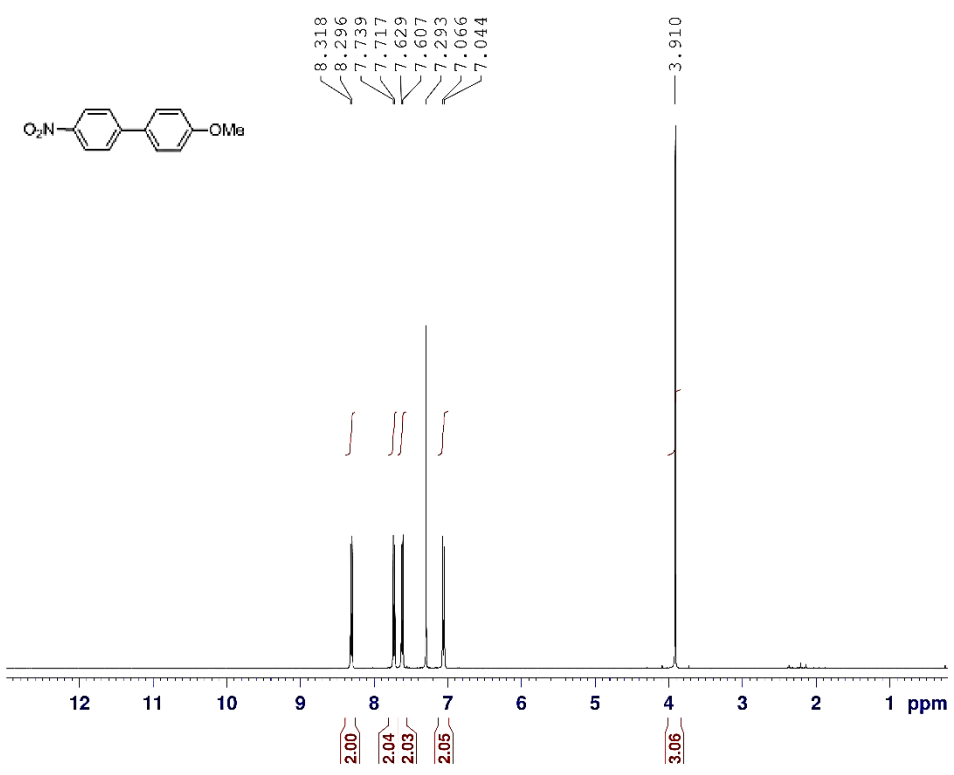

**BRUKER**

```

NAME      Dr.Gholi nejad (hamed)
EXPNO     47
PROCNO    1
Date_     20150103
Time      10.37
INSTRUM   spect
PROBHD    5 mm PABBO BB-
PULPROG   zg30
TD        65536
SOLVENT   CDCl3
NS        8
DS        0
SWH       8012.820 Hz
FIDRES    0.122266 Hz
AQ        4.0894966 sec
RG        322
DW        62.400 usec
DE        6.50 usec
TE        294.9 K
DL        6.00000000 sec
TDO       1

===== CHANNEL f1 =====
NUC1      1H
P1        14.00 usec
PL1       -2.00 dB
PL1W      11.86359406 W
SFO1      400.2236020 MHz
SI        32768
SF        400.2200000 MHz
WDW       EM
SSB       0
LB        0.30 Hz
GB        0
PC        1.00

```

**<sup>1</sup>H NMR of 4-methoxy-4'-nitro-1,1'-biphenyl**

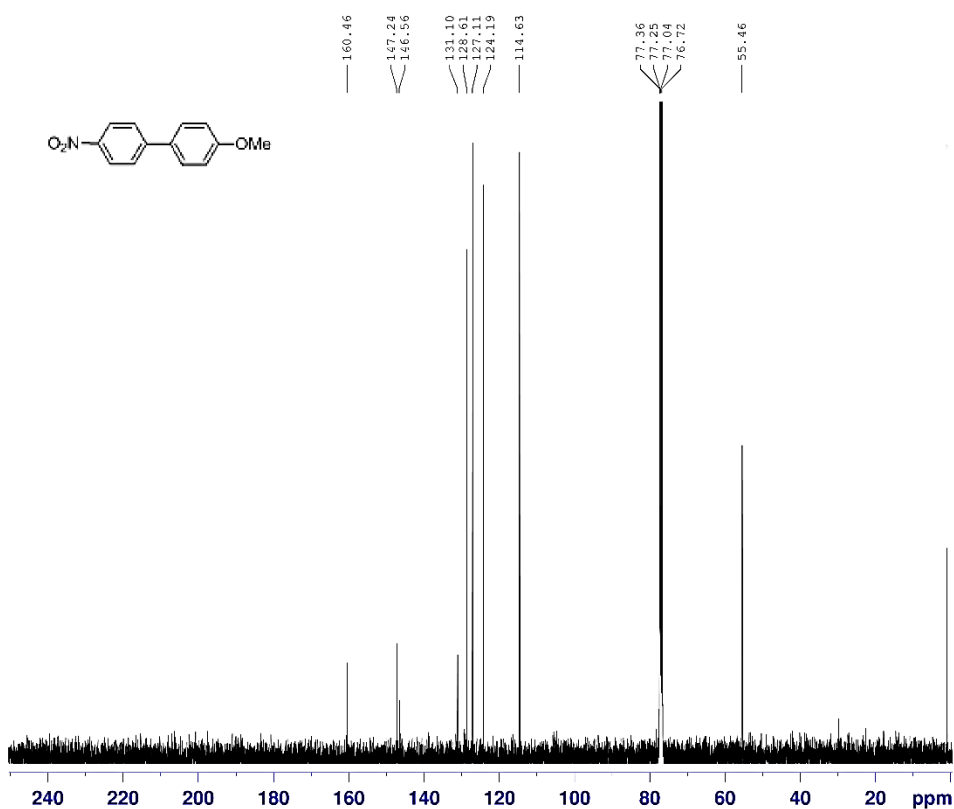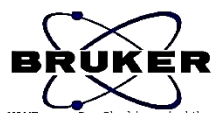

```

NAME      Dr.Gholi nejad (hamed)
EXTNO     48
PROCNO    1
Date_     20150105
Time      11.03
INSTRUM   spect
PROBHD    5 mm PABBO BB-
PULPROG   zgpg30
TD        65536
SOLVENT   cdcl3
NS        1700
DS        0
SWH       25252.525 Hz
FIDRES    0.385323 Hz
AQ        1.2976629 sec
RG        2050
DW        19.800 usec
DE        6.50 usec
TE        294.4 K
D1        2.0000000 sec
D11       0.0300000 sec
TDO       1

===== CHANNEL f1 =====
NUC1      13C
P1        9.00 usec
PL1       -0.90 dB
PL1W     42.02801895 W
SFO1     100.6479784 MHz

===== CHANNEL f2 =====
CPDPRG2   waltz16
NUC2      1H
PCPD2     90.00 usec
PL2       -2.00 dB
PL12     14.16 dB
PL13     17.90 dB
PL2W     11.86359406 W
PL12W    0.28722104 W
PL13W    0.12139934 W
SFO2     400.2216009 MHz
SI        32768
SF        100.6353990 MHz
WDW       EM
SSB       0
LB        1.00 Hz
GB        0
PC        1.40

```

<sup>13</sup>C NMR of 4-methoxy-4'-nitro-1,1'-biphenyl



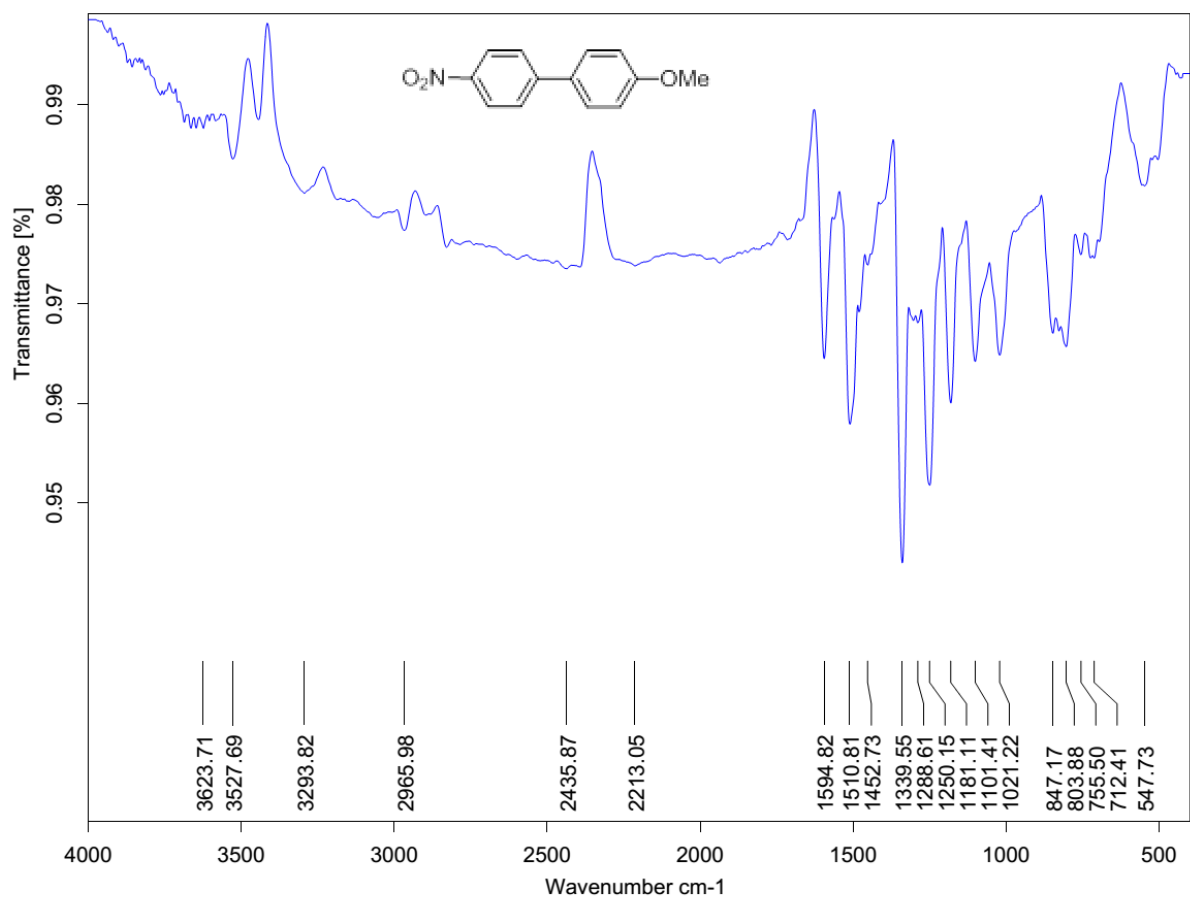

**FT-IR of 4-methoxy-4'-nitro-1,1'-biphenyl**

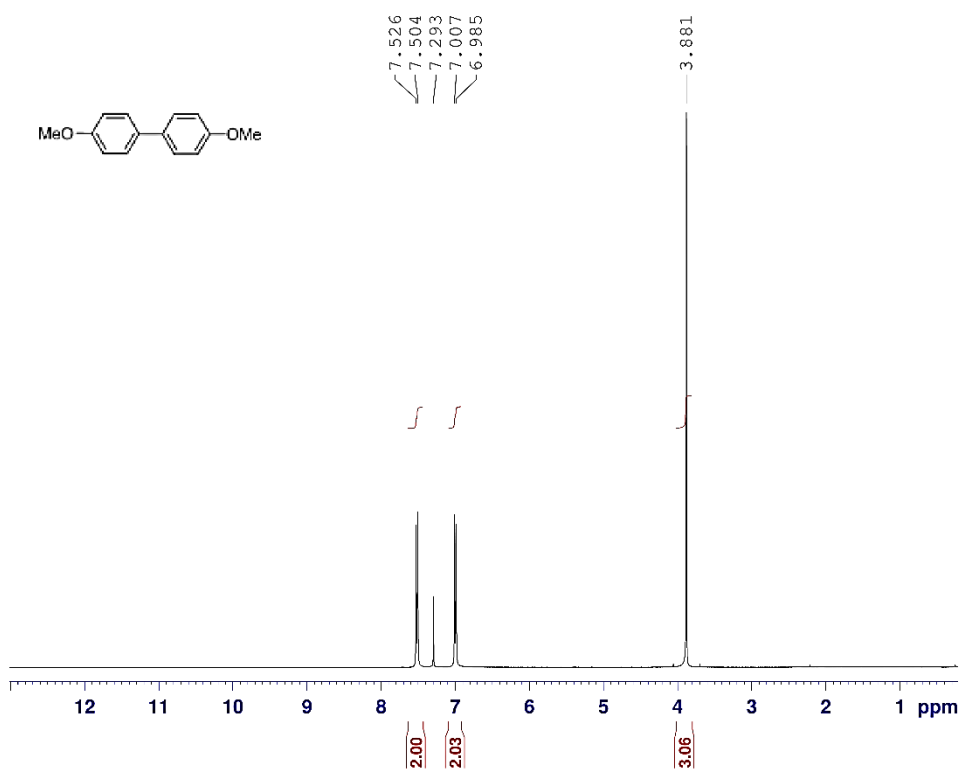

**BRUKER**

Dr. Gholi nejad (hamed)

```

NAME          Dr. Gholi nejad (hamed)
EXPNO         1
PROCNO        1
Date_         20150105
Time         12.25
INSTRUM       spect
PROBHD        5 mm PABBO BBI
PULPROG       zg30
TD            65536
SOLVENT       CDCl3
NS            6
DS            0
SWH           8012.820 Hz
FIDRES        0.122256 Hz
AQ            4.0894956 sec
RG            203
DW            62.400 usec
DE            6.50 usec
TE            292.5 K
D1            6.0000000 sec
TD0           1

----- CHANNEL f1 -----
NUC1          1H
P1            14.00 usec
PL1           -2.00 dB
PL1W         11.86359406 W
SFO1         400.2236020 MHz
SI           32768
SF           400.2200000 MHz
WDW           EM
SSB           0
LB            0.30 Hz
GB            0
PC            1.00

```

<sup>1</sup>H NMR of 4,4'-dimethoxy-1,1'-biphenyl

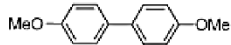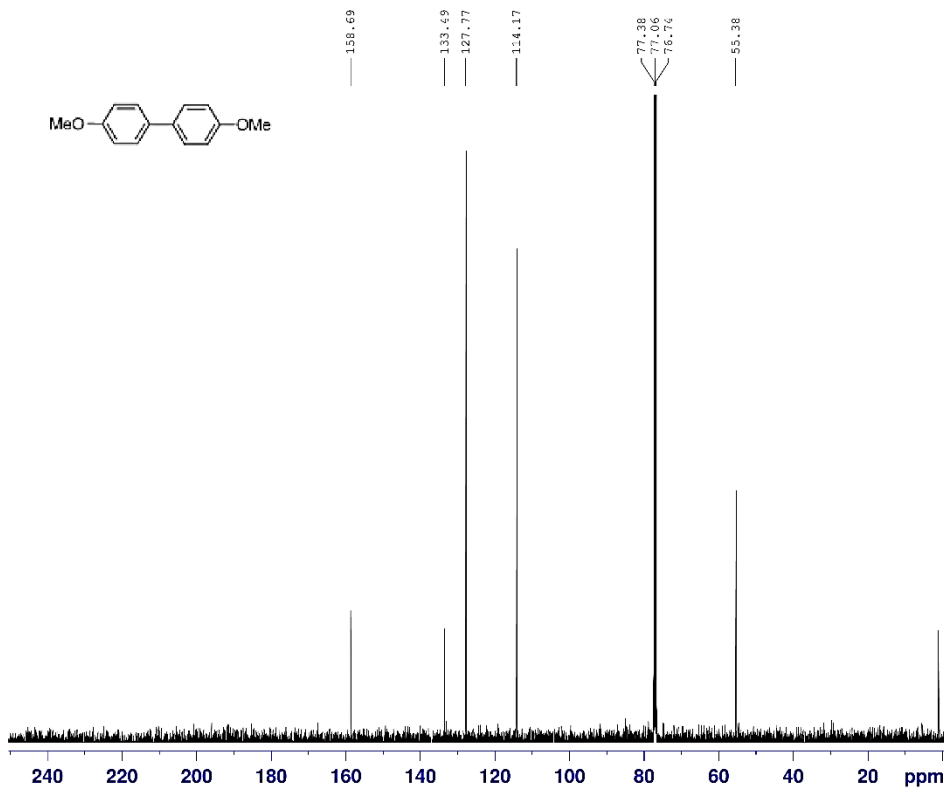

<sup>13</sup>C NMR of 4,4'-dimethoxy-1,1'-biphenyl

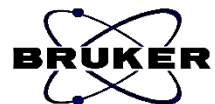

```

NAME      Dr.Gholi nejad(hamed)
EXPNO     1
PROCNO    1
Date_     20150105
Time      12.30
INSTRUM   spect
PROBHD    5 mm PABBO BB-
PULPROG   zgpg30
TD         65536
SOLVENT   CDCl3
NS         140
DS         0
SWH        25252.525 Hz
FIDRES     0.385323 Hz
AQ         1.2976629 sec
RG         2050
DW         19.800 usec
DE         6.50 usec
TE         292.9 K
D1         2.00000000 sec
D11        0.03000000 sec
TD0        1
  
```

```

----- CHANNEL f1 -----
NUC1      13C
P1        9.00 usec
PL1       -0.90 dB
PLLW      42.02801895 W
SFO1      100.6479784 MHz
  
```

```

----- CHANNEL f2 -----
CPDPRG2   waltz16
NUC2       1H
PCPD2     90.00 usec
PL2        -2.00 dB
PL12      14.16 dB
PL13      17.90 dB
PL2W      11.86359406 W
PL12W     0.28722104 W
PL13W     0.12139934 W
SFO2      400.2216009 MHz
SI         32768
SF         100.6353990 MHz
WDW        EM
SSB         0
LB          1.00 Hz
CB           0
PC          1.40
  
```

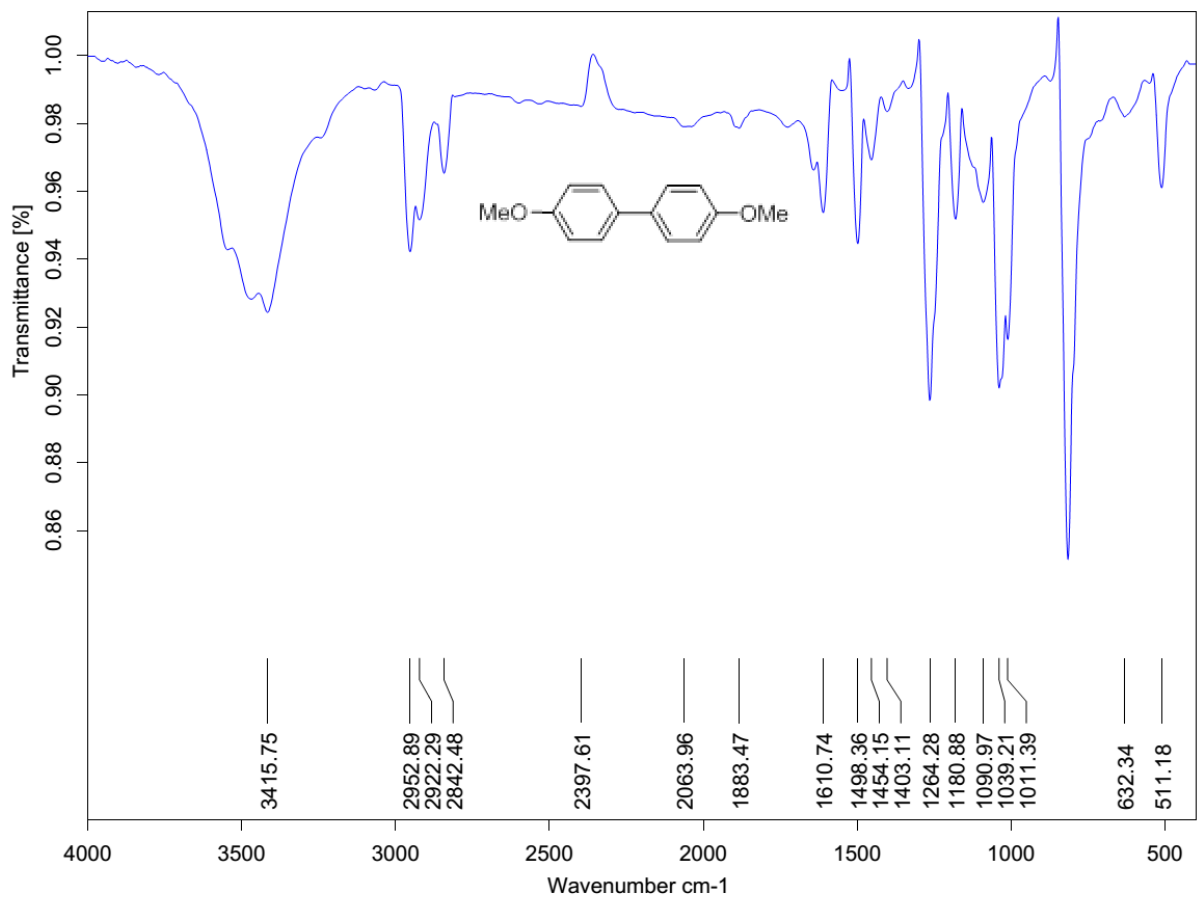

**FT-IR of 4,4'-dimethoxy-1,1'-biphenyl**

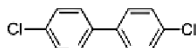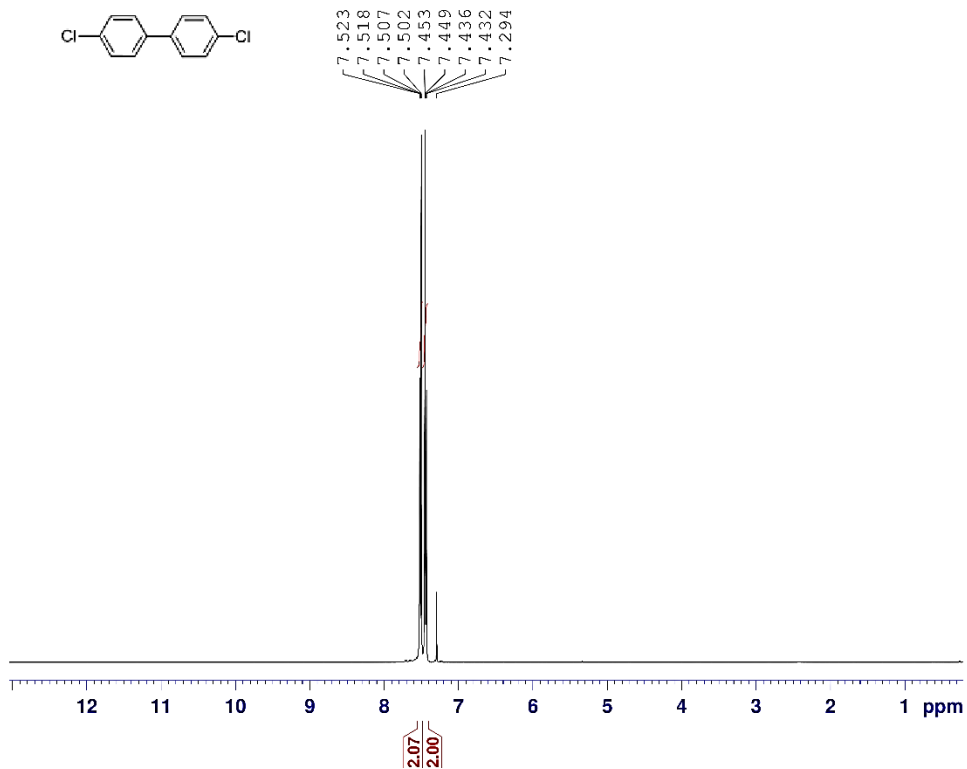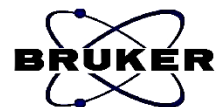

```
NAME      Dr.Gholi nejad (hamed)
EXPNO     86
PROCNO    1
Date_     20150307
Time      10.19
INSTRUM   spect
PROBHD    5 mm PABBO BB-
PULPROG   zg30
TD        65536
SOLVENT   CDCl3
NS        5
DS        0
SWH       8012.820 Hz
FIDRES    0.122266 Hz
AQ        4.0894966 sec
RG        161
DW        62.400 usec
DE        6.50 usec
TE        293.5 K
D1        6.0000000 sec
TDO       1

===== CHANNEL f1 =====
NUC1      1H
P1        14.00 usec
PL1       -2.00 dB
PL1W     11.86359406 W
SFO1      400.2236020 MHz
SI        32768
SF        400.2200000 MHz
WDW       EM
SSB       0
LB        0.30 Hz
GB        0
PC        1.00
```

<sup>1</sup>H NMR of 4,4'-dichloro-1,1'-biphenyl

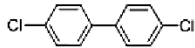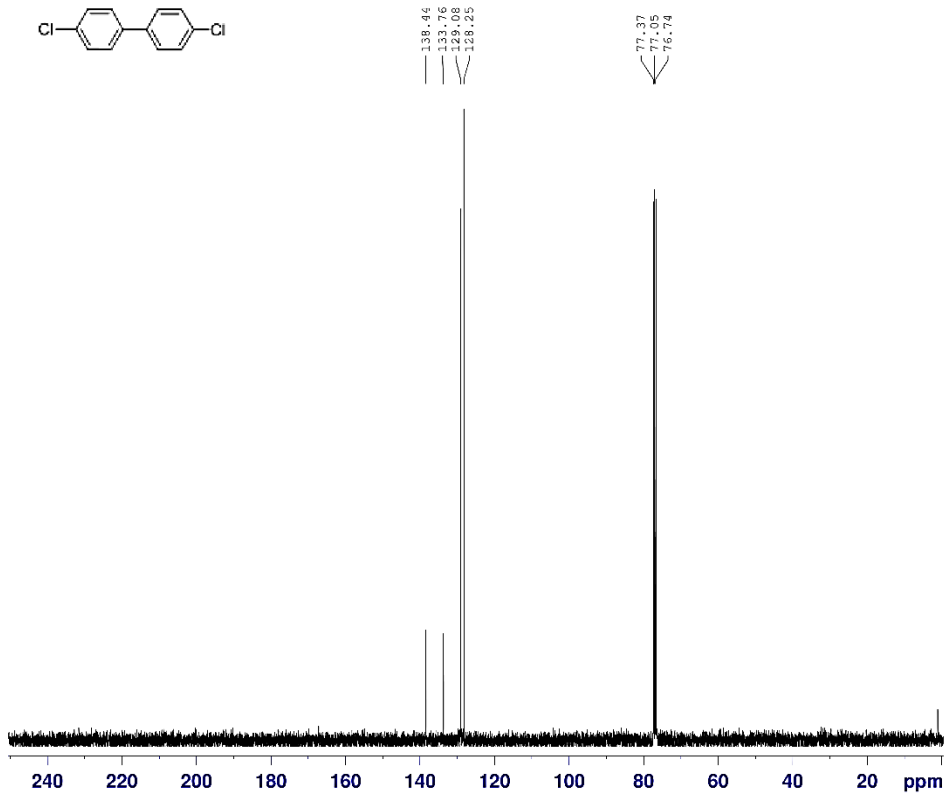

<sup>13</sup>C NMR of 4,4'-dichloro-1,1'-biphenyl

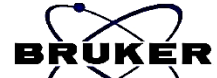

```

NAME      Dr.Gholi nejad(hamed)
EXPNO     1
PROCNO    1
Date_     20150307
Time      10.21
INSTRUM   spect
PROBHD    5 mm PABBO BB-
PULPROG   zgpg30
TD        65536
SOLVENT   CDCl3
NS        50
DS        0
SWH       25252.525 Hz
FIDRES    0.385323 Hz
AQ        1.2976629 sec
RG        2050
DW        19.800 usec
DE        6.50 usec
TE        293.5 K
D1        2.0000000 sec
D11       0.0300000 sec
TD0       1

===== CHANNEL f1 =====
NUC1      13C
P1        9.00 usec
PL1       -0.90 dB
PL1W     42.02801895 W
SFO1     100.6479784 MHz

===== CHANNEL f2 =====
CPDPRG2   waltz16
NUC2      1H
PCPD2     90.00 usec
PL2       -2.00 dB
PL12     14.16 dB
PL13     17.90 dB
P12W     11.86359406 W
F112W    0.28722104 W
F113W    0.12139934 W
SFO2     400.2216009 MHz
SI        32768
SF        100.6353990 MHz
WDW       EM
SSB       0
LB        1.00 Hz
GB        0
PC        1.40
  
```

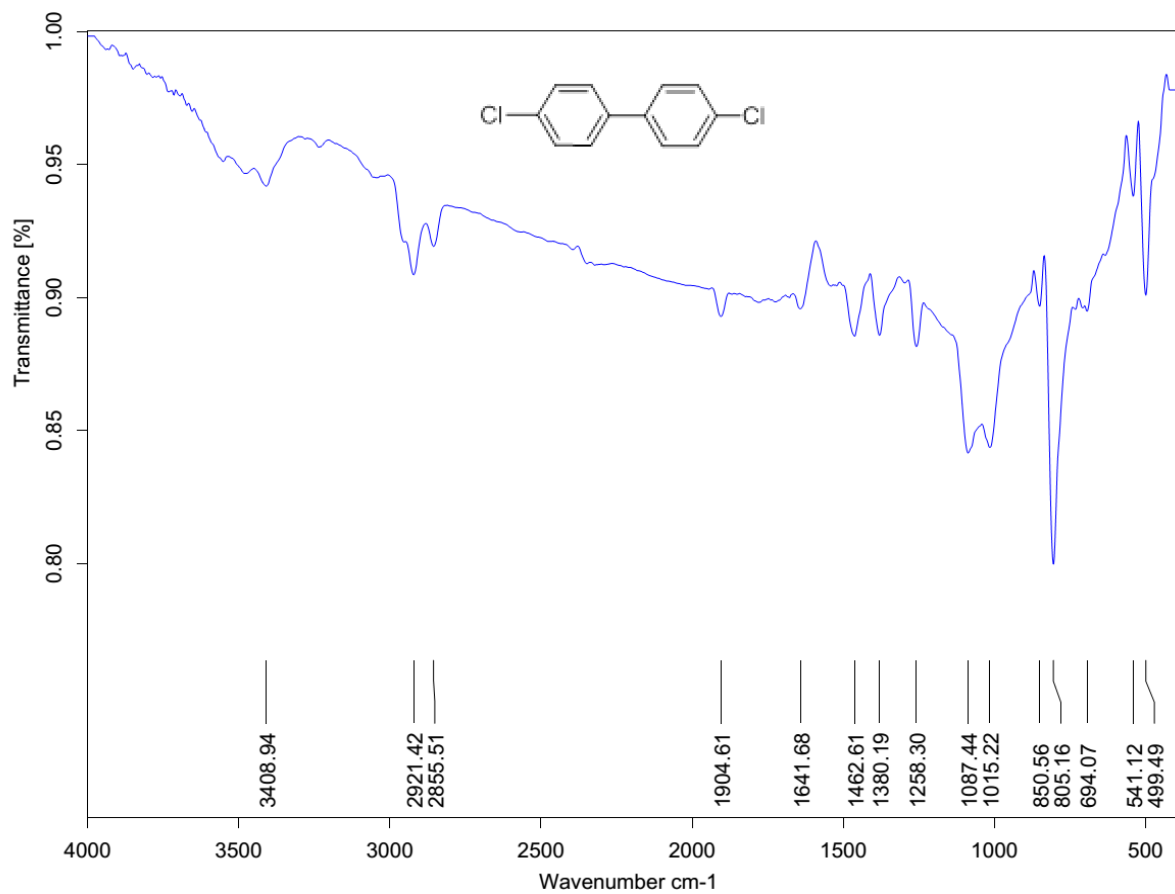

**FT-IR of 4,4'-dichloro-1,1'-biphenyl**

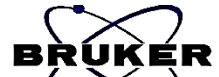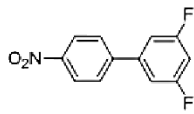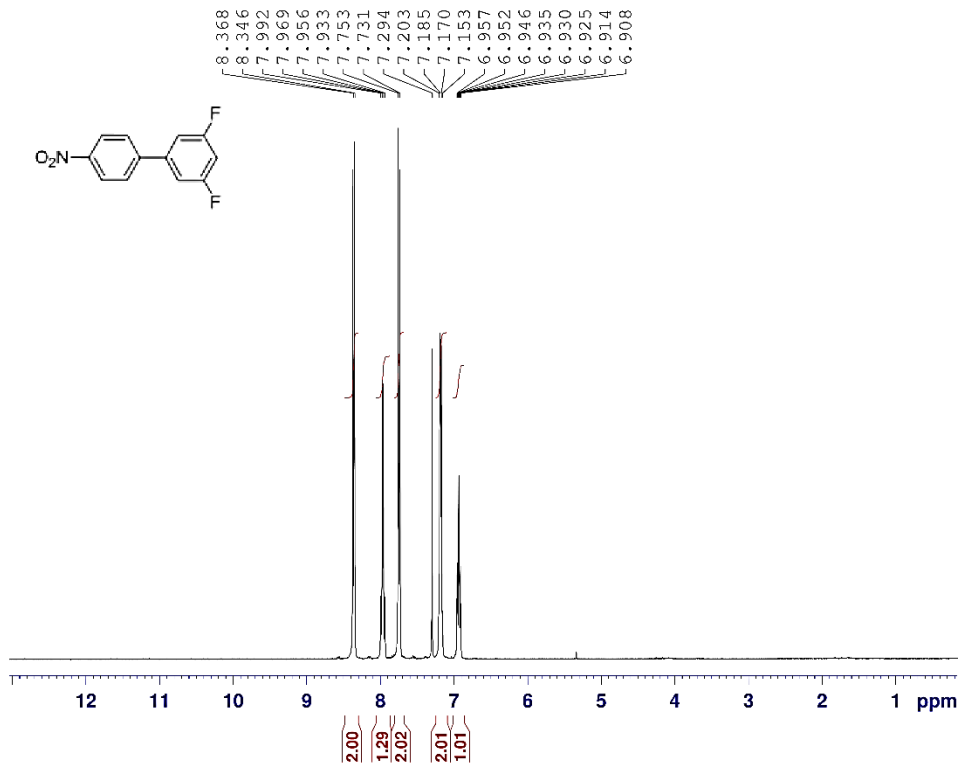

```
NAME      Dr.Gholi nejad (hamed)
EXPNO     96
PROCNO    1
Date_     20150307
Time      15.52
INSTRUM   spect
PROBHD    5 mm PABBO BB-
PULPROG   zg30
TD         65536
SOLVENT   CDCl3
NS         12
DS         0
SWH        8012.820 Hz
FIDRES     0.122266 Hz
AQ         4.0894966 sec
RG         203
DE         62.400 usec
TE         294.4 K
D1         6.0000000 sec
TD0        1

===== CHANNEL f1 =====
NUC1      1H
P1        14.00 usec
PL1       -2.00 dB
PL1W      11.86359406 W
SFO1      400.2236020 MHz
SI         32768
SF         400.2200000 MHz
WDW        EM
SSB        0
LB         0.30 Hz
GB         0
PC         1.00
```

**<sup>1</sup>H NMR of 3,5-difluoro-4'-nitro-1,1'-biphenyl**



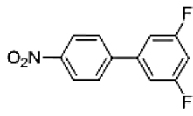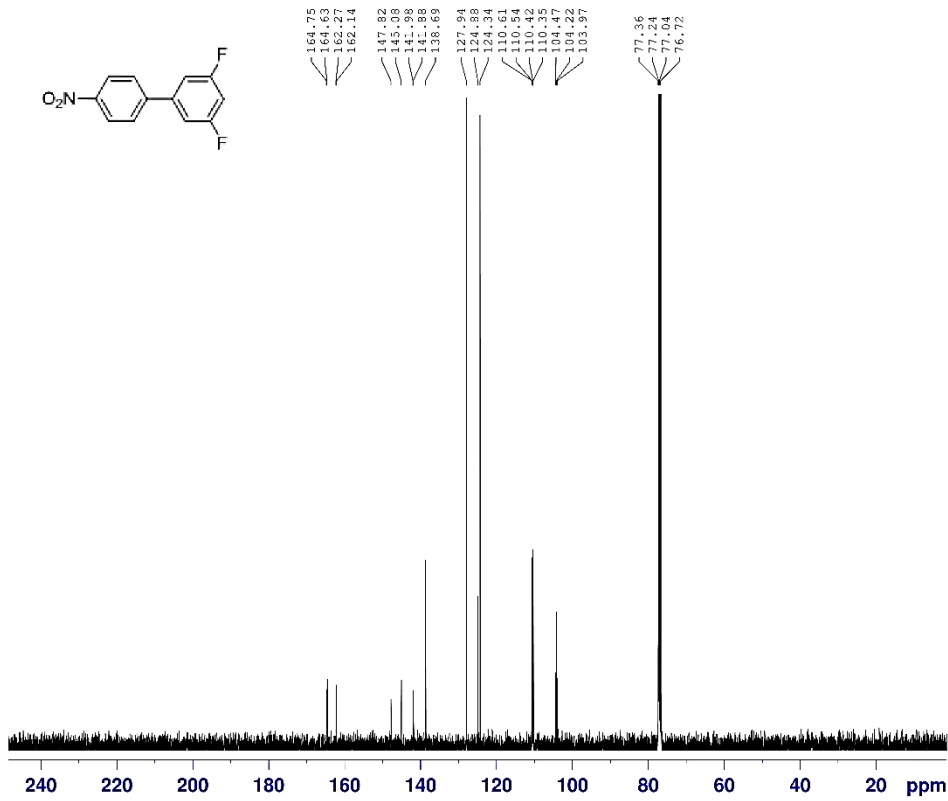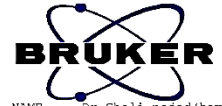

Dr.Gholi nejad(hamed)

```

NAME
EXPNO          97
PROCNO         1
Date_          20150307
Time           16.02
INSTRUM        spect
PROBHD         5 mm PABBO BR-
PULPROG        zgpg30
TD             65536
SOLVENT        CDCl3
NS             400
DS             0
SWH            25252.525 Hz
FIDRES         0.385323 Hz
AQ            1.2976629 sec
RG             2050
DM            19.800 usec
DE             6.50 usec
TE            294.8 K
D1            2.00000000 sec
D11           0.03000000 sec
TDO           1

===== CHANNEL f1 =====
NUC1           13C
P1             9.00 usec
PL1           -0.90 dB
PL1W          42.02801895 W
SF01          100.6479784 MHz

===== CHANNEL f2 =====
CPDPRG2        waltz16
NUC2           1H
PCPD2          90.00 usec
PL2            -2.00 dB
PL12           14.16 dB
PL13           17.90 dB
PL2W          11.86359406 W
PL12W         0.28722104 W
PL13W         0.12139934 W
SF02          400.2216009 MHz
S1            32768
SF           100.6353990 MHz
WDW            EM
SSB            0
LB             1.00 Hz
GB             0
PC             1.40

```

<sup>13</sup>C NMR of 3,5-difluoro-4'-nitro-1,1'-biphenyl

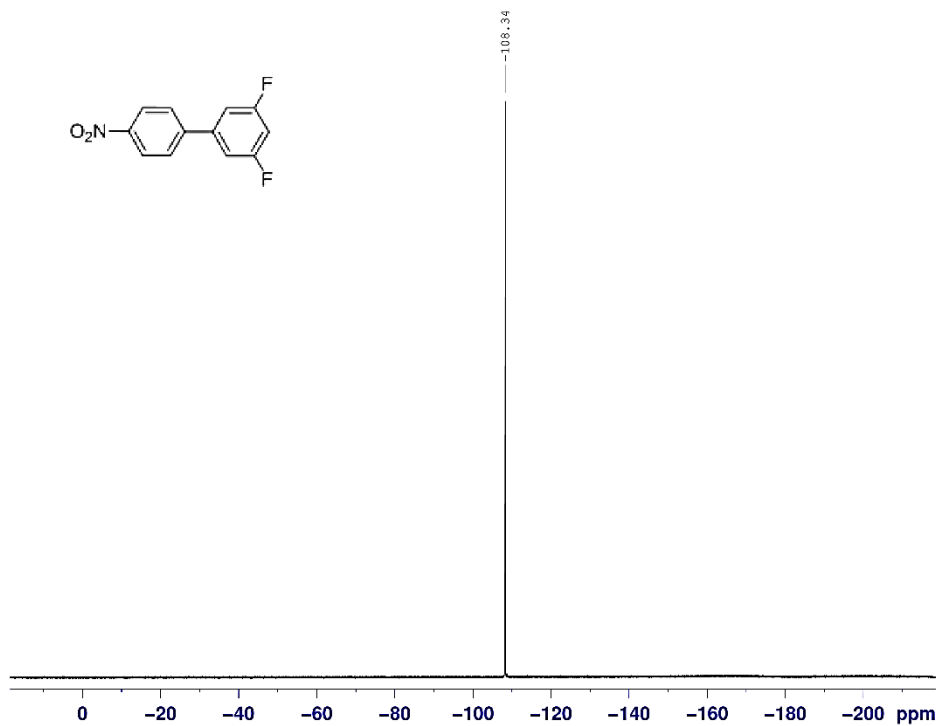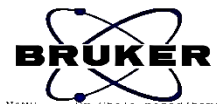

```

NAME: Dr. Uno 11 mejad (named)
EXPNO 110
PROCNO 1
Date_ 20150408
Time_ 15.53
INSTRUM spect
PROBHD 5 mm PABBO BB-
PULPROG zgpg30
TD 131072
SOLVENT CDCl3
NS 12
DS 0
SWH 89285.711 Hz
FIDRES 0.681196 Hz
AQ 0.7340532 sec
RG 2050
DW 5.600 usec
DE 6.50 usec
TE 295.1 K
D1 1.0000000 sec
D11 0.0300000 sec
D12 0.0000200 sec
TD0 1

```

```

===== CHANNEL f1 =====
NUC1 19F
P1 14.00 usec
PL1 -2.40 dB
PL1W 14.31771946 W
SFO1 376.5453925 MHz

```

```

===== CHANNEL f2 =====
CPDPRG2 waltz16
NUC2 1H
PCPD2 90.00 usec
PL2 -2.00 dB
PL12 14.48 dB
PL12W 11.86359406 W
PL12W 0.26681873 W
SFO2 400.2216009 MHz
SI 65536
SF 376.5830510 MHz
WDW EM
SSB 0
LB 0.30 Hz
CR 0
PC 1.00

```

<sup>19</sup>F NMR of 3,5-difluoro-4'-nitro-1,1'-biphenyl

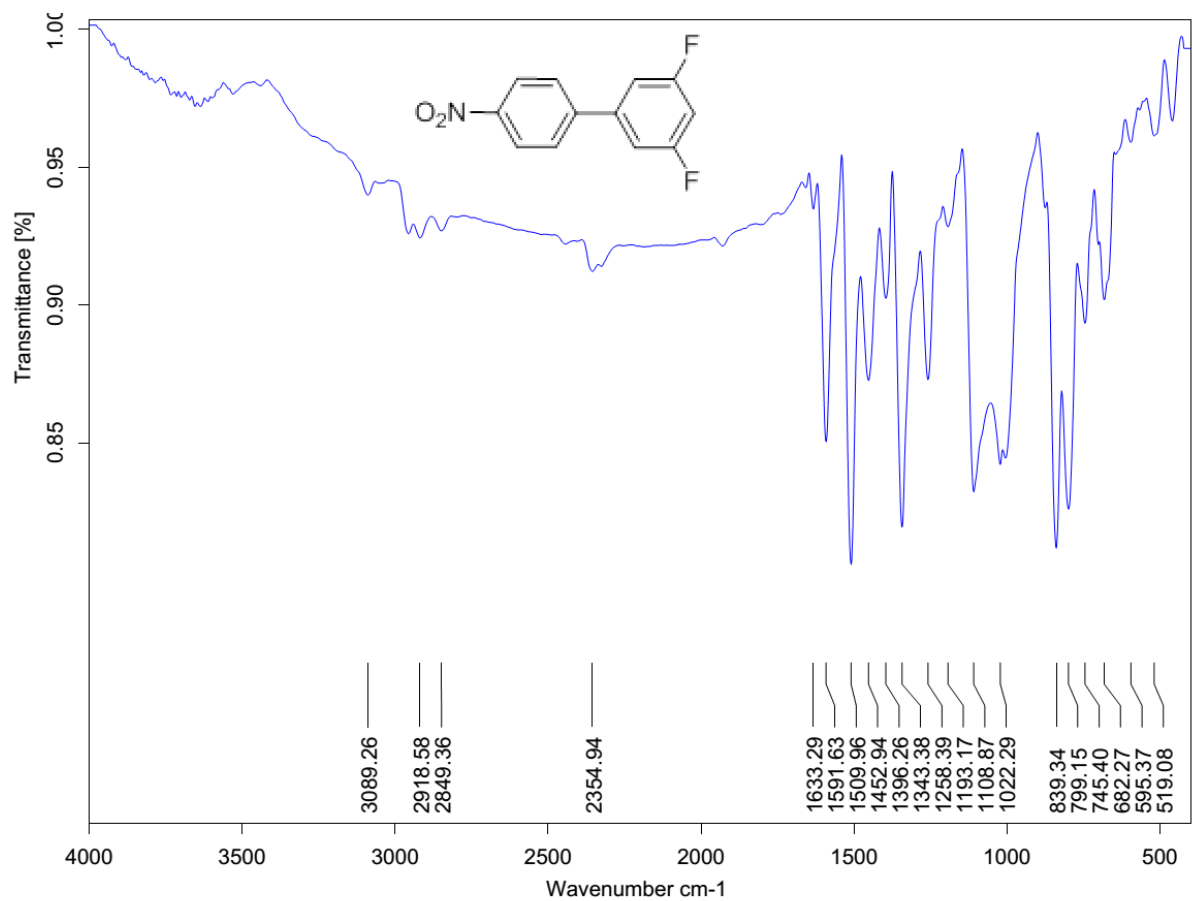

**FT-IR of 3,5-difluoro-4'-nitro-1,1'-biphenyl**

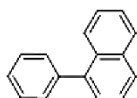

7.961  
7.941  
7.919  
7.898  
7.594  
7.588  
7.571  
7.550  
7.543  
7.537  
7.524  
7.518  
7.479  
7.293

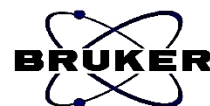

NAME Dr.Gholi nejad (hamed)  
EXPNO 33  
PROCNO 1  
Date\_ 20141118  
Time 7.37  
INSTRUM spect  
PROBHD 5 mm PABBO BE-  
PULPROG zg30  
TD 65536  
SOLVENT CHCl3  
NS 12  
DS 0  
SWH 8012.820 Hz  
FIDRES 0.122266 Hz  
AQ 4.0894966 sec  
RG 256  
EW 62.400 usec  
DE 6.50 usec  
TE 294.2 K  
D1 6.0000000 sec  
TD0 1

===== CHANNEL f1 =====  
NUC1 1H  
P1 14.00 usec  
PL1 -2.00 dB  
PL1W 11.86359406 W  
SFO1 400.2236070 MHz  
SI 32768  
SF 400.2200000 MHz  
WEW EM  
SSE 0  
LB 0.30 Hz  
CB 0  
PC 1.00

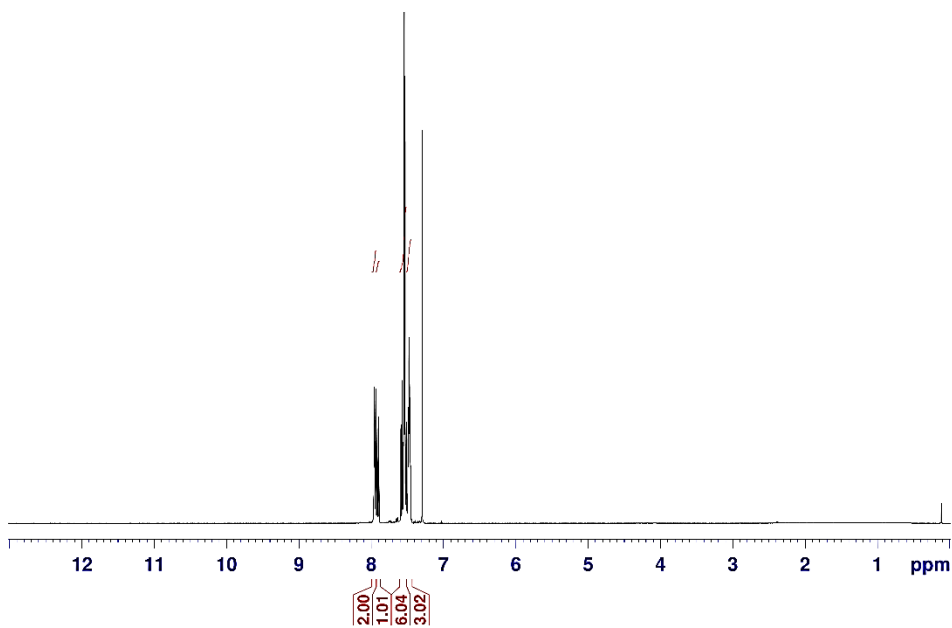

<sup>1</sup>H NMR of 1-phenylnaphthalene

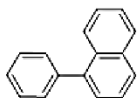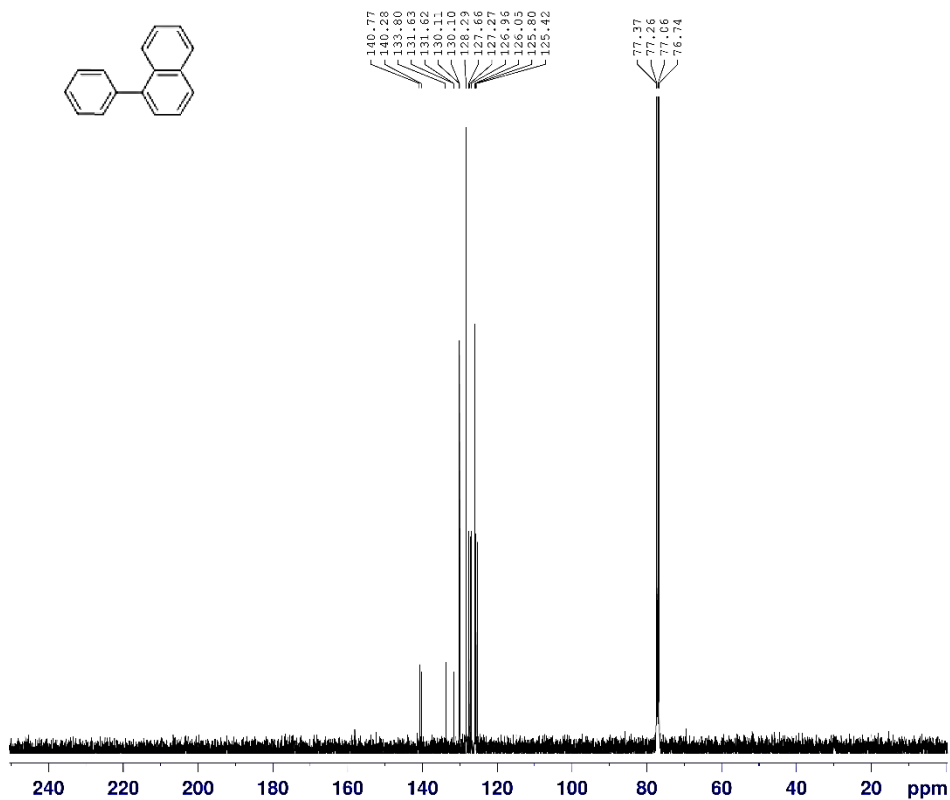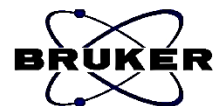

```

NAME      Dr.Gholi nejad(hamed)
EXPNO     34
PROCNO    1
Date_     20141117
Time      11.14
INSTRUM   spect
PROBHD    5 mm PARBO BR-
PULPROG   zgpg30
TD        65536
SOLVENT   CDCl3
NS        650
DS        0
SWH       25252.525 Hz
FIDRES    0.385323 Hz
AQ        1.2976629 sec
RG        2050
DW        19.800 usec
DE        6.50 usec
TE        293.1 K
D1        2.0000000 sec
D11       0.0300000 sec
TDO       1
  
```

```

===== CHANNEL f1 =====
NUC1      13C
P1        9.00 usec
PT1       -0.90 dB
PT1W     42.02801895 W
SFO1     100.6479784 MHz
  
```

```

===== CHANNEL f2 =====
CPDPRG2   waltz16
NUC2      1H
PCPD2     90.00 usec
PL2       -2.00 dB
PLL2      14.16 dB
PLL3      17.90 dB
PL12W     11.86359406 W
PT12W     0.28722104 W
PT13W     0.12139934 W
SFO2     400.2216009 MHz
SI        32768
SF        100.6353990 MHz
WDW       EM
SSB       0
LB        1.00 Hz
GB        0
FC        1.40
  
```

<sup>13</sup>C NMR of 1-phenylnaphthalene

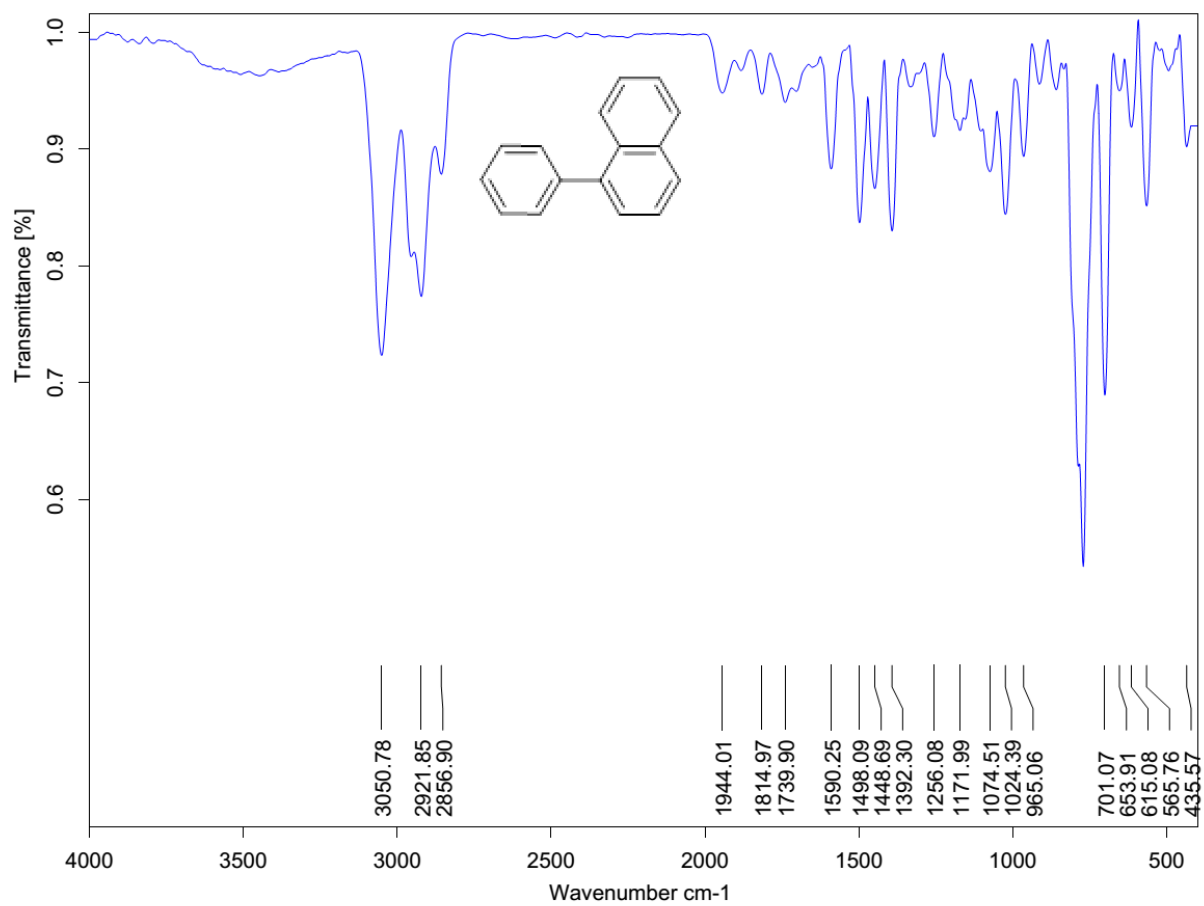

**FT-IR of 1-phenylnaphthalene**

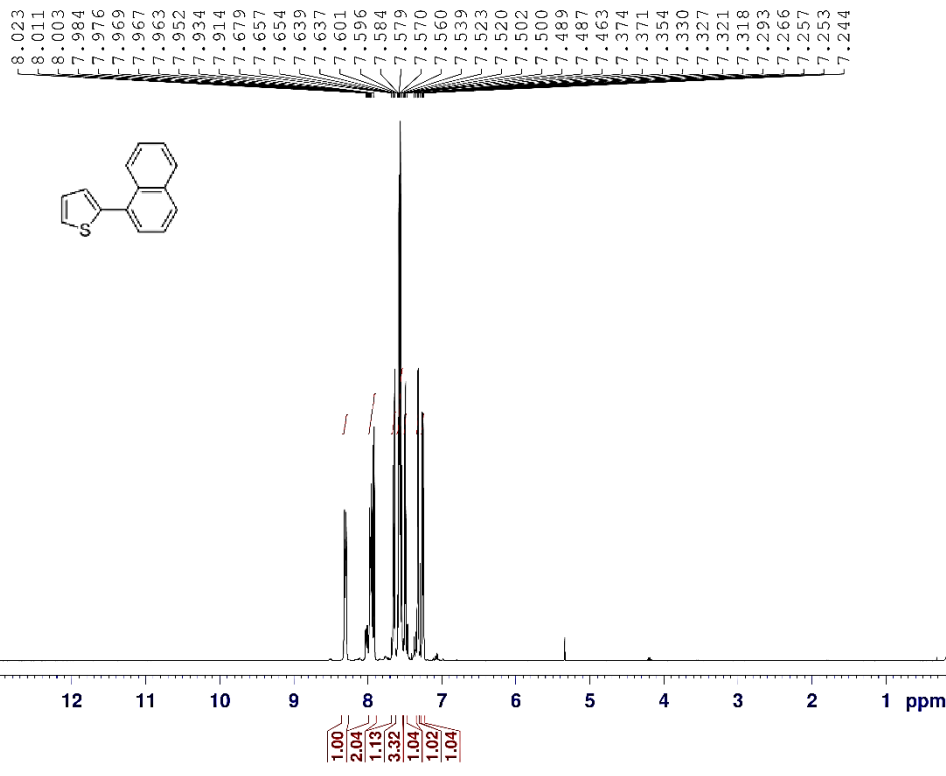

**BRUKER**

```

NAME      Dr.Gholi nejad(hamed)
EXPNO     90
PROCNO    1
Date_     20150307
Time      11.04
INSTRUM   spect
PROBHD    5 mm PABBO BB-
PULPROG   zg30
TD         65536
SOLVENT   CDCl3
NS         12
DS         0
SWH        8012.820 Hz
FIDRES     0.122266 Hz
AQ         4.0894966 sec
RG         101
DW         62.400 usec
DE         6.50 usec
TE         293.8 K
D1         6.0000000 sec
TDO        1

===== CHANNEL f1 =====
NUC1      1H
P1        14.00 usec
PL1       -2.00 dB
PL1W      11.86359406 W
SFO1      400.2236020 MHz
SI        32768
SF        400.2200000 MHz
WDW       EM
SSB       0
LB        0.30 Hz
CB         0
PC         1.00

```

<sup>1</sup>H NMR of 2-(naphthalen-1-yl)thiophene

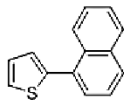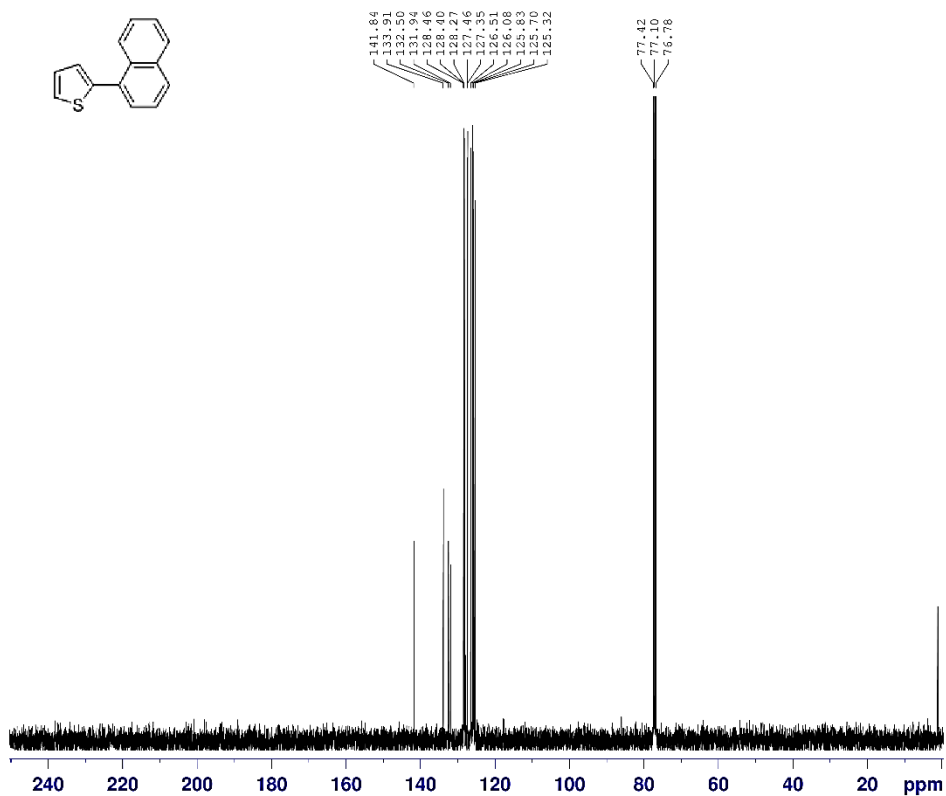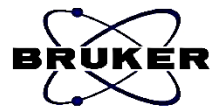

```

NAME      Dr.Gholi nejad(hamed)
EXPNO     91
PROCNO    1
Date_     20150307
Time      11.06
INSTRUM   spect
PROBHD    5 mm PABBO BB-
PULPROG   zgpg30
TD        65536
SOLVENT   CDCl3
NS        82
DS        0
SWH       25252.525 Hz
FIDRES    0.385323 Hz
AQ        1.2976629 sec
RG        2050
DW        19.800 usec
DE        6.50 usec
TE        293.9 K
D1        2.0000000 sec
D11       0.0300000 sec
TD0       1
  
```

```

===== CHANNEL f1 =====
NUC1      13C
P1        9.00 usec
PL1       -0.90 dB
PL1W     42.02801895 W
SFO1     100.6479784 MHz
  
```

```

===== CHANNEL f2 =====
CPDPRG2   waltz16
NUC2      1H
PCPD2     90.00 usec
P2        -2.00 dB
PL2       14.16 dB
PL13     17.90 dB
PL2W     11.86359406 W
PL12W    0.28722104 W
PL13W    0.12139934 W
SFO2     400.2216009 MHz
SI        32768
SF       100.6353990 MHz
WDW       EM
SSB       0
LB        1.00 Hz
GB        0
PC        1.40
  
```

<sup>13</sup>C NMR of 2-(naphthalen-1-yl)thiophene



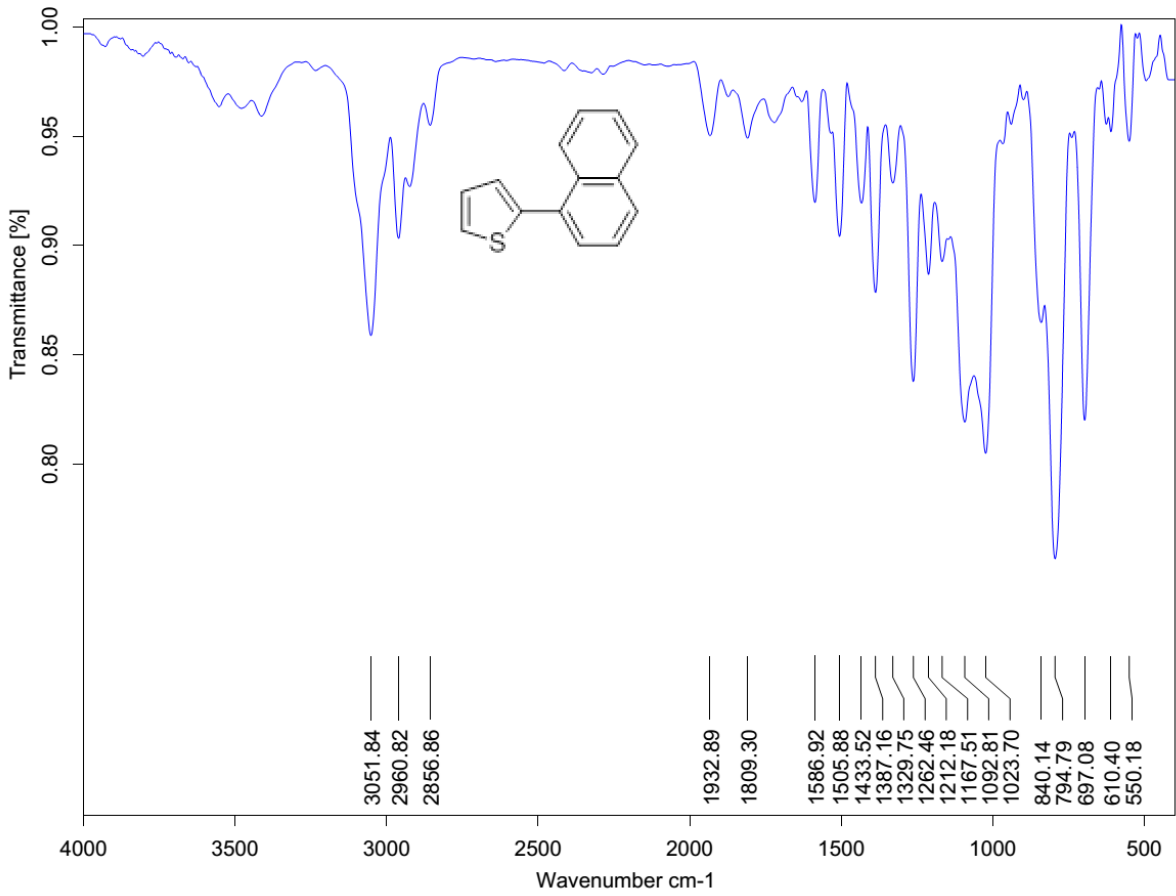

**FT-IR of 2-(naphthalen-1-yl)thiophene**

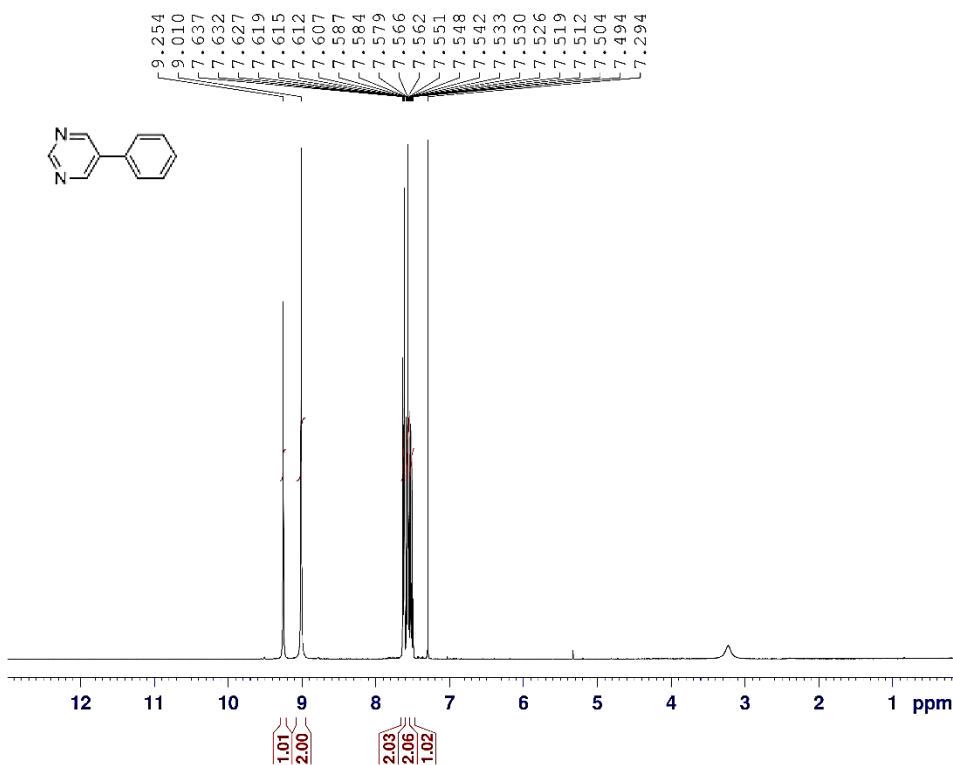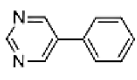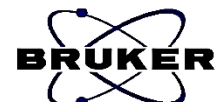

```

NAME      Dr.Gholi nejad(hamed)
EXPNO     20
PROCNO    1
Date_     20141101
Time      16.31
INSTRUM   spect
PROBHD    5 mm PARBO BR-
PULPROG   zg30
TD         65536
SOLVENT   CDCl3
NS         12
DS         0
SWE       8012.820 Hz
FIDRES    0.122266 Hz
AQ         4.0894966 sec
RG         181
DW         62.400 usec
DE         6.50 usec
TE         294.1 K
D1         6.00000000 sec
TDO        1

----- CHANNEL f1 -----
NUC1      1H
P1        14.00 usec
PL1       -2.00 dB
PL1W      11.86359406 W
SFO1      400.2236020 MHz
ST        32768
SF        400.2200000 MHz
WDW       EM
SSB       0
LB        0.30 Hz
GB        0
PC        1.00
  
```

<sup>1</sup>H NMR of 5-phenylpyrimidine

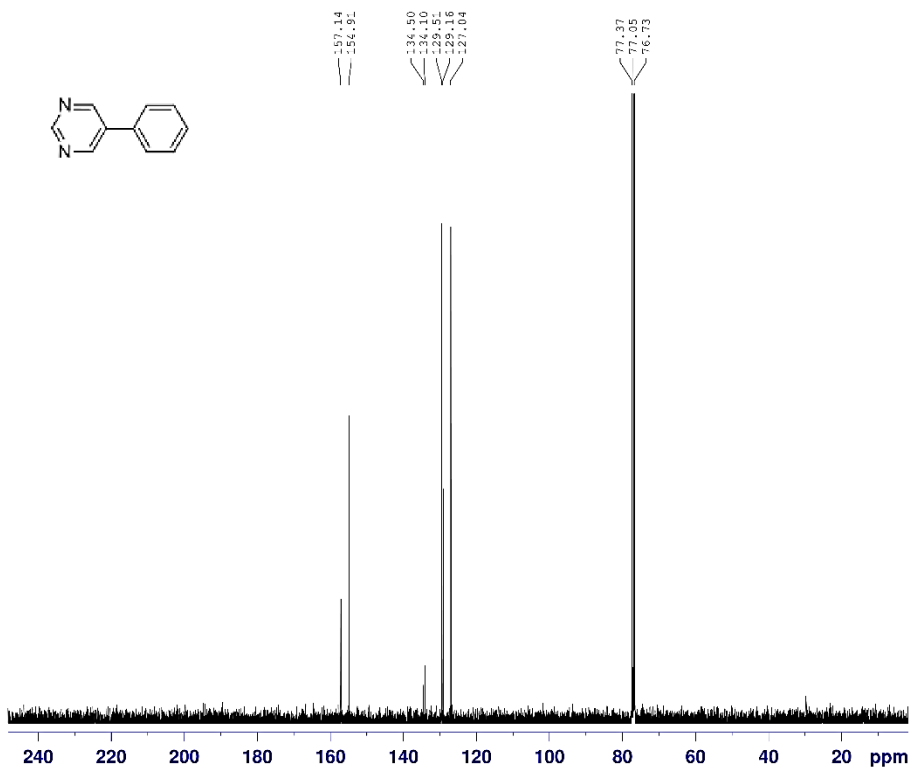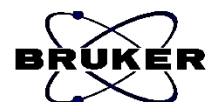

```

NAME      Dr.Gholi nejad (hamed)
EXPNO     21
PROCNO    1
Date_     20141101
Time      16.36
INSTRUM   spect
PROBHD    5 mm PABBO B3-
PULPROG   zgpg30
TD        65536
SOLVENT   CDCl3
NS        200
DS        0
SWH       25252.525 Hz
FIDRES    0.385323 Hz
AQ        1.2976629 sec
RG        2050
DW        19.800 usec
DE        6.50 usec
TE        294.2 K
D1        2.00000000 sec
D11       0.03000000 sec
TD0       1

===== CHANNEL f1 =====
NUC1      13C
P1        9.00 usec
PL1       -0.90 dB
PL1W      42.02801895 W
SFO1      100.6479784 MHz

===== CHANNEL f2 =====
CDPRG2    waltz16
NUC2      1H
PCPD2     90.00 usec
PL2       -2.00 dB
PL12      14.16 dB
PL13      17.90 dB
PL2W      11.86359406 W
PL12W     0.28722104 W
PL13W     0.12139934 W
SFO2      400.2216009 MHz
SI        32768
SF        100.6353990 MHz
WDW       EM
SSB       0
LB        1.00 Hz
GB        0
PC        1.40

```

<sup>13</sup>C NMR of 5-phenylpyrimidine

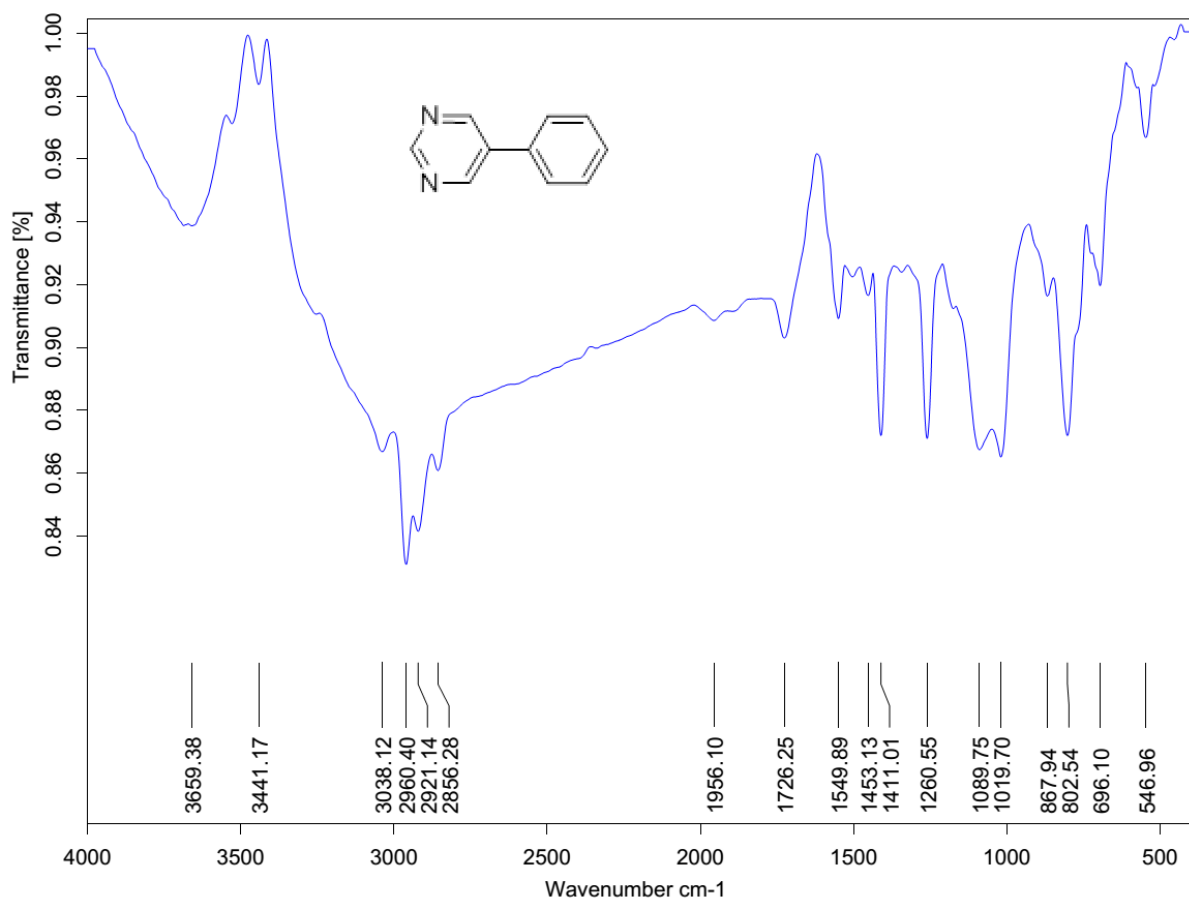

**FT-IR of 5-phenylpyrimidine**

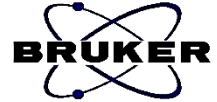

NAME Dr.Choli nejod (hamed)  
EXPNO 24  
PROCNO 1  
Date\_ 20141115  
Time 11.08  
INSTRUM spect  
PROBHD 5 mm PABBO BB-  
PULPROG zg30  
TD 65536  
SOLVENT CDCl3  
NS 12  
DS 0  
SWH 8012.820 Hz  
FIDRES 0.122266 Hz  
AQ 4.0894966 sec  
RG 181  
DW 62.400 usec  
DE 6.50 usec  
TE 295.2 K  
D1 6.0000000 sec  
TD0 1

----- CHANNEL f1 -----  
NUC1 1H  
P1 14.00 usec  
PL1 -2.00 dB  
PL1W 11.86359406 W  
SFO1 400.2236020 MHz  
SI 32768  
SF 400.2200000 MHz  
WDW EM  
SSB 0  
LR 0.30 Hz  
GB 0  
PC 1.00

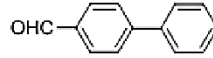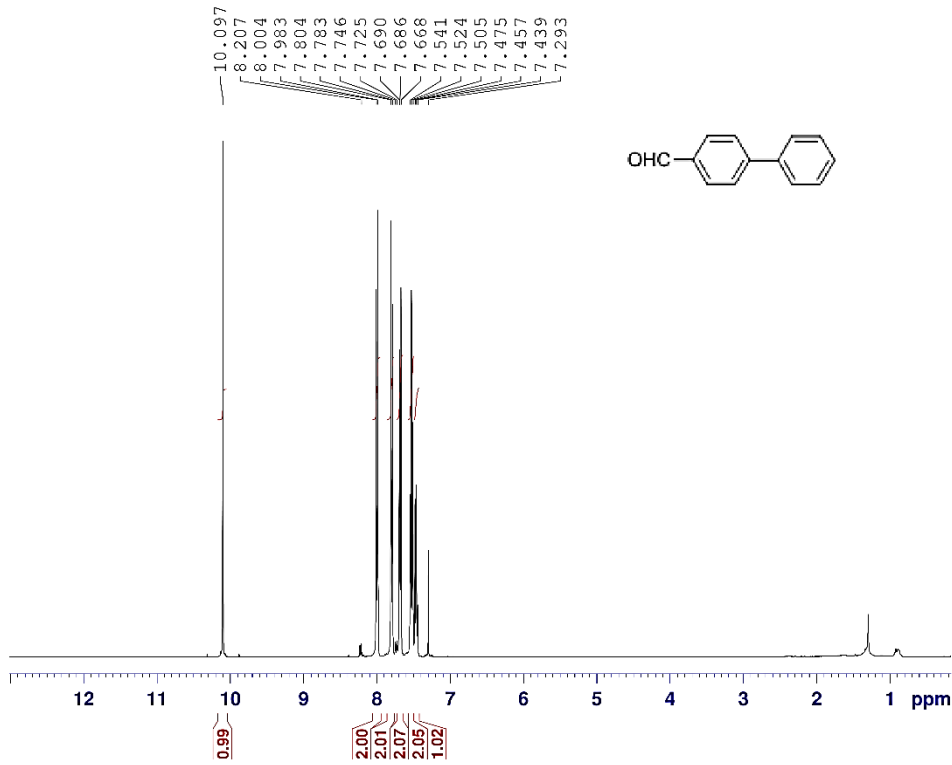

<sup>1</sup>H NMR of [1,1'-biphenyl]-4-carbaldehyde

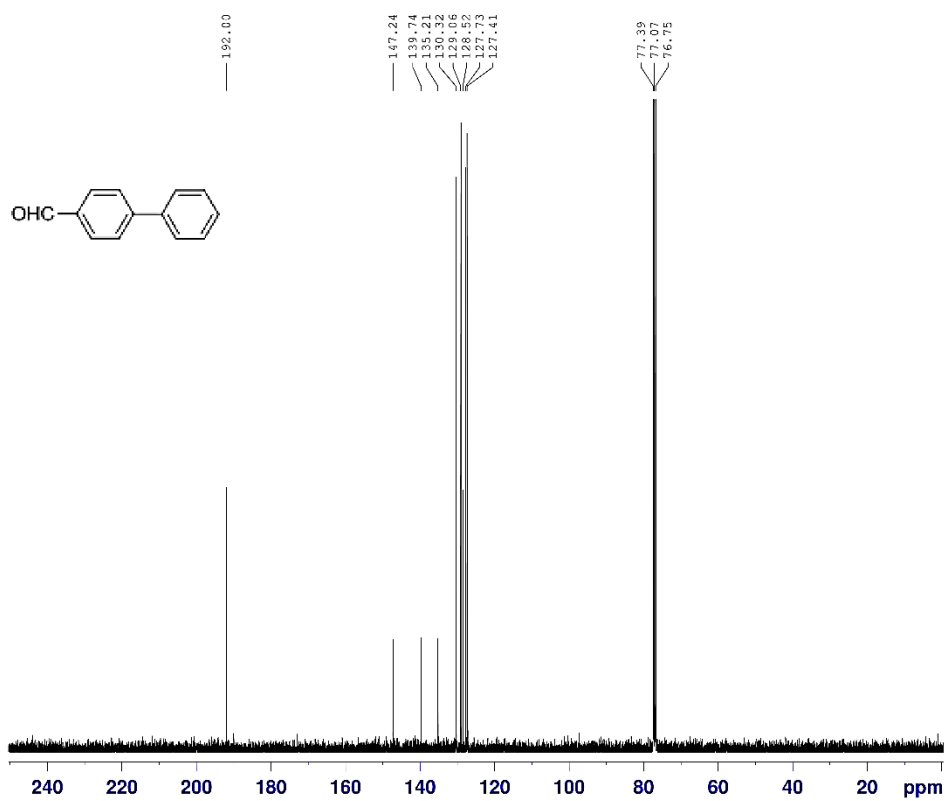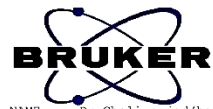

```

NAME      Dr.Gholi nejad(hamed)
EXPNO     25
PROCNO    1
Date_     20141115
Time      11.14
INSTRUM   spect
PROBHD    5 mm F4BBO BB-
PULPROG   zgpg30
TD         65536
SOLVENT   CDCl3
NS         100
DS         0
SWH        25252.525 Hz
FIDRES     0.385323 Hz
AQ         1.2976629 sec
RG         2050
DW         19.800 usec
DE         6.50 usec
TE         295.6 K
D1         2.0000000 sec
D11        0.0300000 sec
TD0        1

----- CHANNEL f1 -----
NUC1       13C
P1         9.00 usec
PL1        -0.90 dB
PL1W       42.02801895 W
SFO1       100.6479784 MHz

----- CHANNEL f2 -----
CPDPRG2   waltz16
NUC2       1H
FCD2      90.00 usec
FL2        -2.00 dB
PL12       14.16 dB
PL13       17.90 dB
PL2W       11.86359406 W
PL12W      0.28722104 W
PL13W      0.12139994 W
SFO2       400.2216009 MHz
SI         32768
SF         100.6353990 MHz
WDW        EM
SSB        0
LB         1.00 Hz
GB         0
PC         1.40

```

<sup>13</sup>C NMR of [1,1'-biphenyl]-4-carbaldehyde

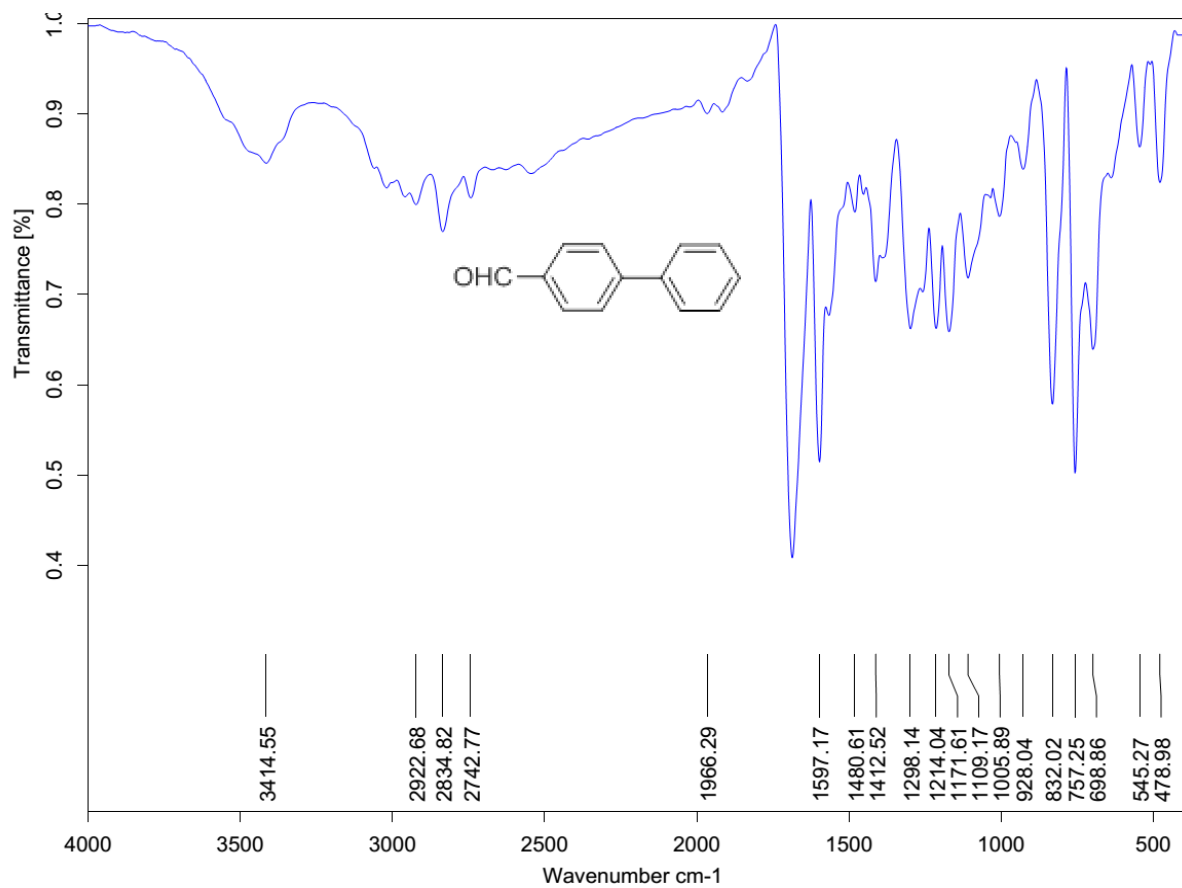

**FT-IR of [1,1'-biphenyl]-4-carbaldehyde**

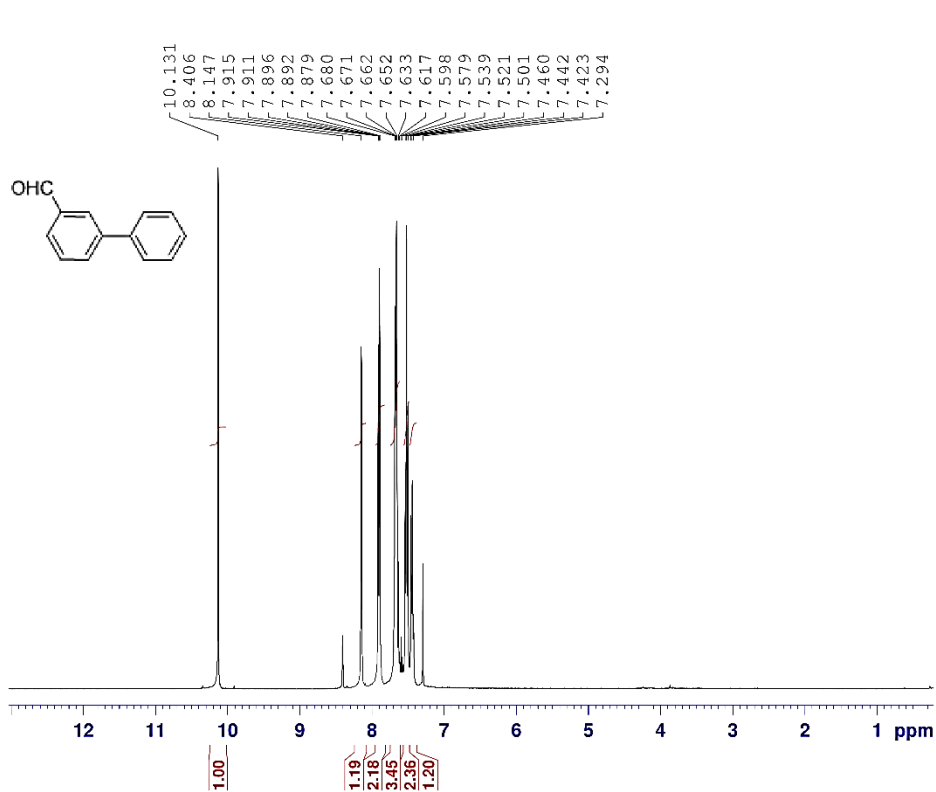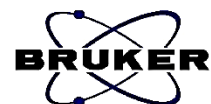

```

NAME      Dr.Gholi nejad (hamed)
EXPNO     39
PROCNO    1
Date_     20141129
Time      9.51
INSTRUM   spect
PROBHD    5 mm PABBO B3-
PULPROG   zg30
TD         65536
SOLVENT   CDCl3
NS         12
DS         0
SWH        8012.820 Hz
FIDRES     0.122266 Hz
AQ         4.0894966 sec
RG         128
DW         62.400 usec
DE         6.50 usec
TE         293.0 K
D1         6.0000000 sec
TD0        1

----- CHANNEL f1 -----
NUC1      1H
P1        14.00 usec
PL1       -2.00 dB
PT1W      11.86359406 W
SFO1      400.2236020 MHz
SI        32768
SF        400.2200000 MHz
WDW       EM
SSB       0
LB        0.30 Hz
GB        0
PC        1.00

```

<sup>1</sup>H NMR of [1,1'-biphenyl]-3-carbaldehyde



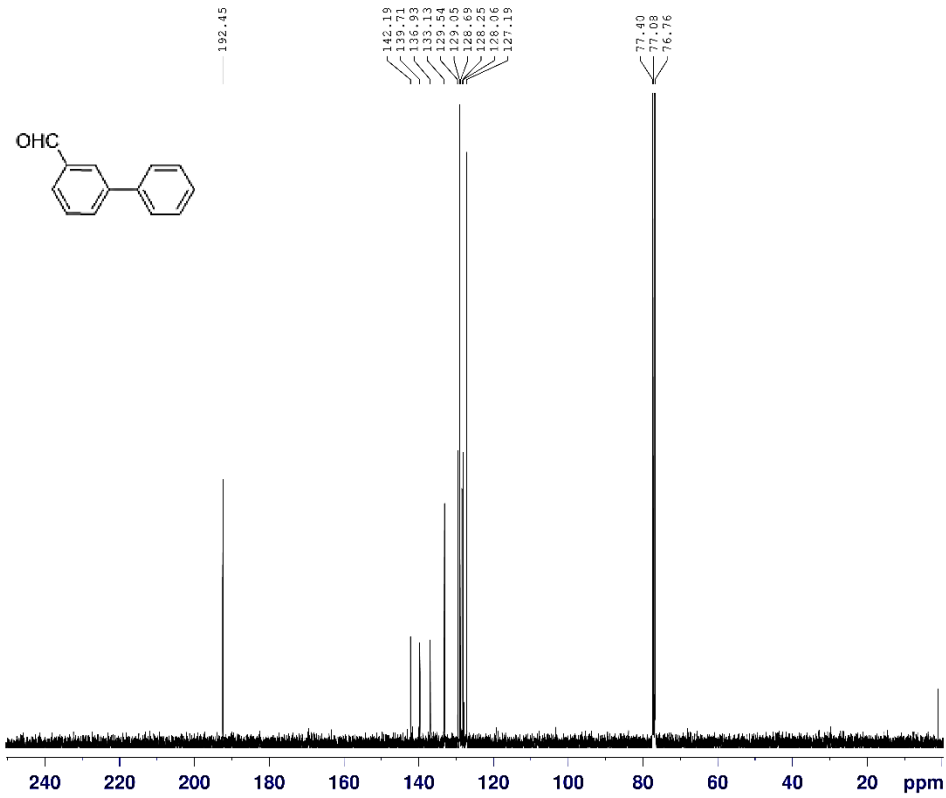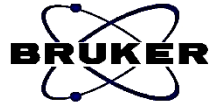

```

NAME      Dr.Chol1 nejad (hamed)
EXPNO     40
PROCNO    1
Date_     20141129
Time      9.55
INSTRUM   spect
PROBHD    5 mm PABBO BB-
PULPROG   zgpg30
TD        65536
SOLVENT   CDCl3
NS        122
DS        0
SWH       25252.525 Hz
FIDRES    0.385323 Hz
AQ        1.2976629 sec
RG        2050
DW        19.800 usec
DE        6.50 usec
TE        293.2 K
D1        2.0000000 sec
D11       0.0300000 sec
TD0       1

----- CHANNEL f1 -----
NUC1      13C
P1        9.00 usec
PL1       -0.90 dB
PL1W      42.02801895 W
SFO1      100.6271804 MHz

----- CHANNEL f2 -----
CPDPRG2   waltz16
NUC2      1H
PCPD2     90.00 usec
PL2       -2.00 dB
PL12      14.16 dB
PL13      17.90 dB
PL2W      11.86359406 W
PL12W     0.28722104 W
PL13W     0.12139934 W
SFO2      400.2216009 MHz
SI        32768
SF        100.6353990 MHz
WDW       EM
SSB       0
LB        1.00 Hz
GB        0
PC        1.40

```

<sup>13</sup>C NMR of [1,1'-biphenyl]-3-carbaldehyde

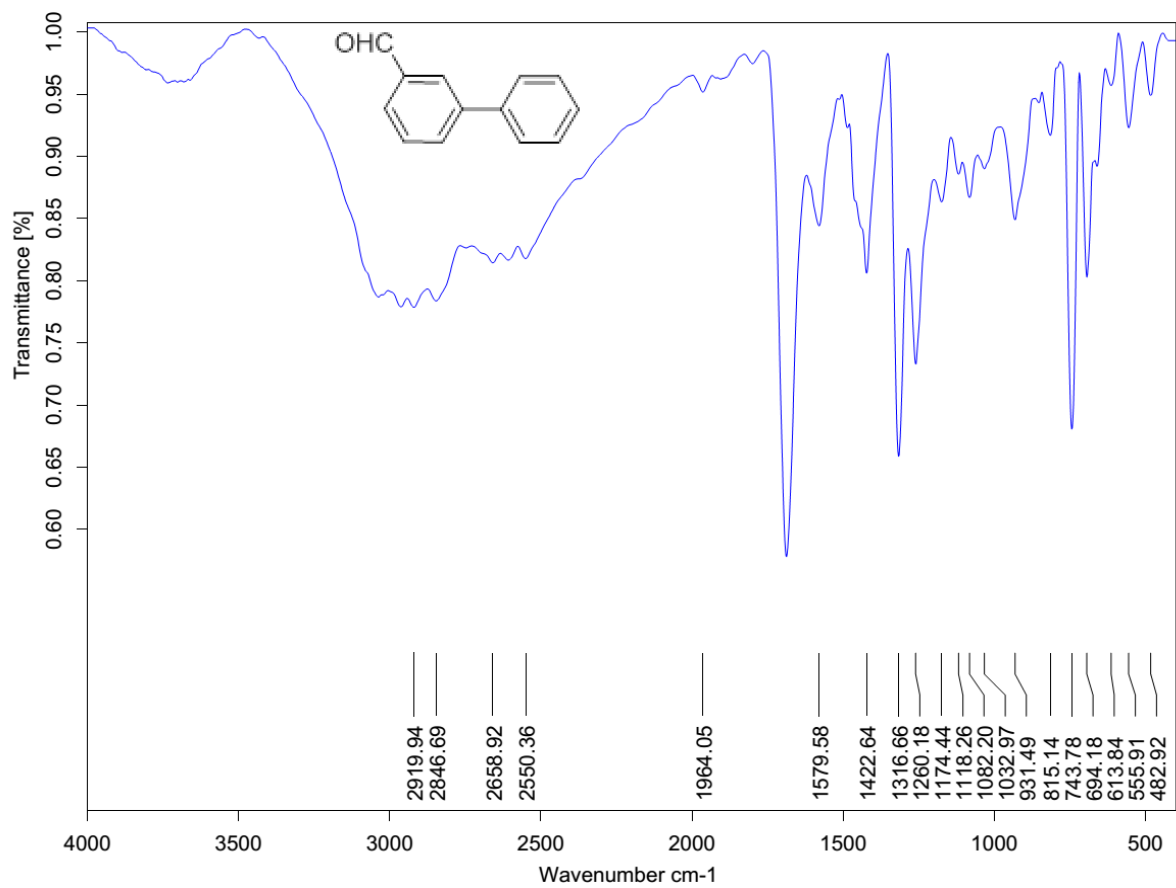

**FT-IR of [1,1'-biphenyl]-3-carbaldehyde**

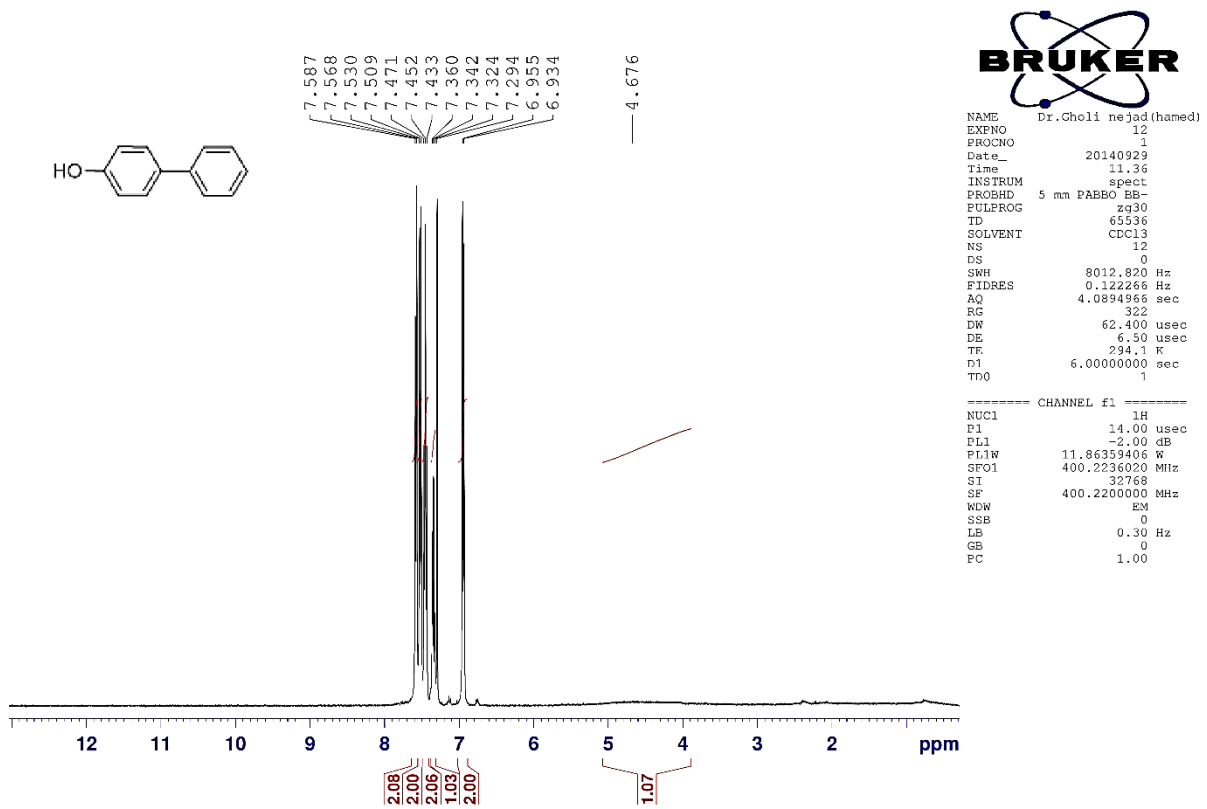

<sup>1</sup>H NMR of [1,1'-biphenyl]-4-ol

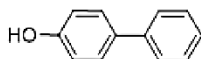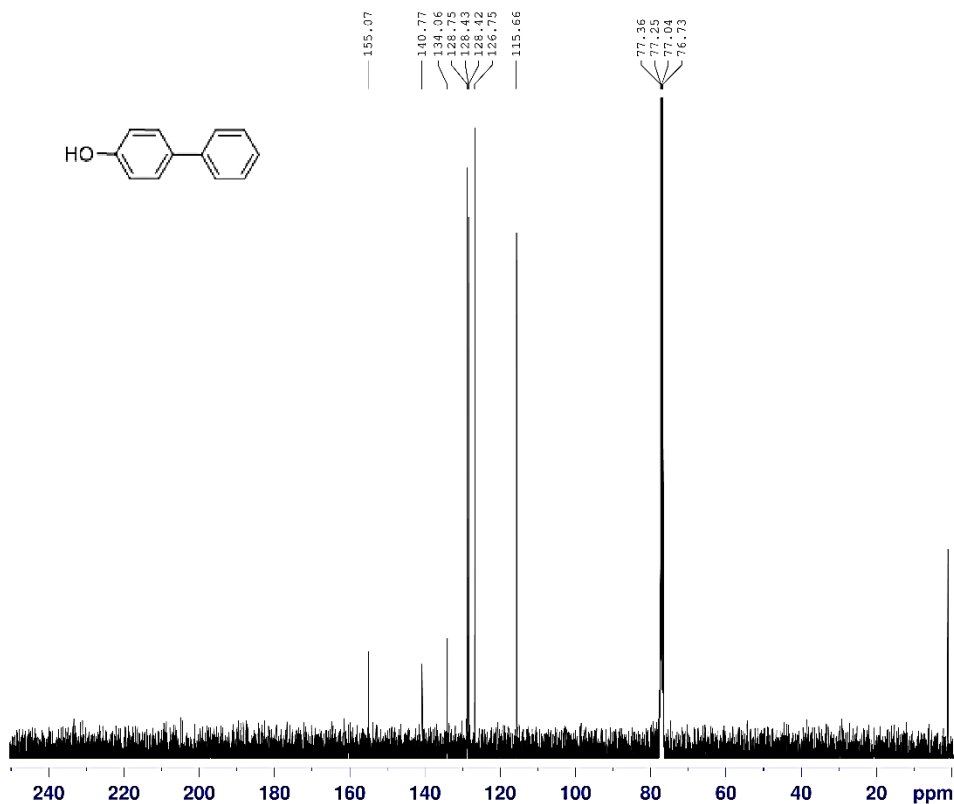

<sup>13</sup>C NMR of [1,1'-biphenyl]-4-ol

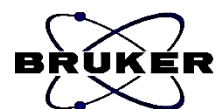

```

NAME      Dr.Gholi nejad (hamed)
EXPNO     23
PROCNO    1
Date_     20141115
Time      14.30
INSTRUM   spect
PROBHD    5 mm PABBO BB-
PULPROG   zgpg30
TD         65536
SOLVENT   CDCl3
NS         800
DS         0
SWH        25252.525 Hz
FIDRES     0.395323 Hz
AQ         1.2976629 sec
RG         2050
DW         19.800 usec
DE         6.50 usec
TE         295.5 K
D1         2.0000000 sec
D11        0.0300000 sec
TD0        1
  
```

```

----- CHANNEL f1 -----
NUC1       13C
P1          9.00 usec
PL1         -0.90 dB
PL1W        42.02801895 W
SFO1        100.6479784 MHz
  
```

```

----- CHANNEL f2 -----
CPDPRG2    waltz16
NUC2        1H
PCPD2       90.00 usec
PL2         -2.00 dB
PL12        14.16 dB
PL13        17.90 dB
PL2W        11.86359406 W
PL12W       0.28722104 W
PL13W       0.12139934 W
SFO2        400.2216009 MHz
SI          32768
SF          100.6353990 MHz
WDW         EM
SSB         0
LB          1.00 Hz
GB          0
PC          1.40
  
```

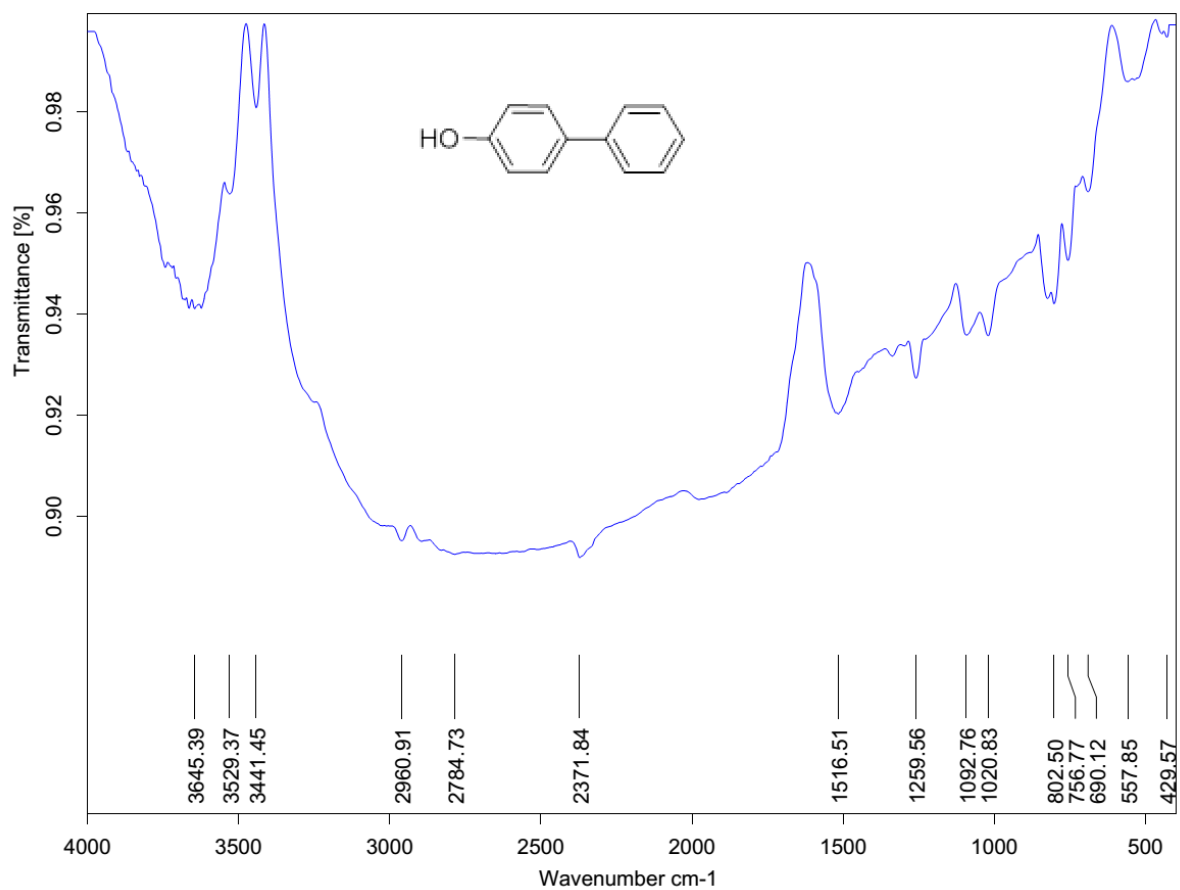

**FT-IR of [1,1'-biphenyl]-4-ol**

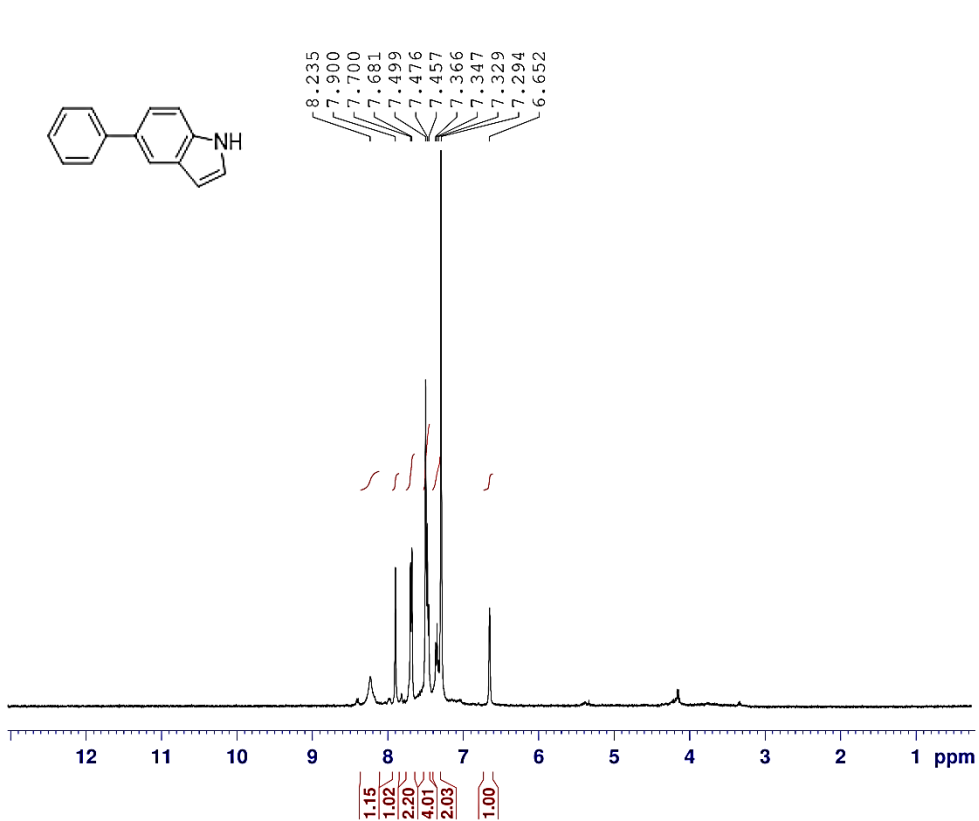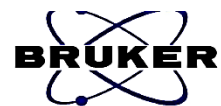

```

NAME      Dr.Gholi nejad (hame
EXPNO     52
PROCNO    1
Date_     20150119
Time      9.21
INSTRUM   spect
PROBHD    5 mm PABBO BB-
PULPROG   zg30
TD         65536
SOLVENT   CDCl3
NS         12
DS         0
SWH       8012.820 Hz
FIDRES    0.122266 Hz
AQ         4.089496 sec
RG         203
DW         62.400 usec
DE         6.50 usec
TE         293.2 K
D1         6.0000000 sec
TD0        1

===== CHANNEL f1 =====
NUC1      1H
P1        14.00 usec
PL1       -2.00 dB
PL1W      11.86359406 W
SFOL      400.2236020 MHz
SI         32768
SF         400.2200000 MHz
WDW        EM
SSB        0
LB         0.30 Hz
GB         0
PC         1.00

```

<sup>1</sup>H NMR of 5-phenyl-1H-indole

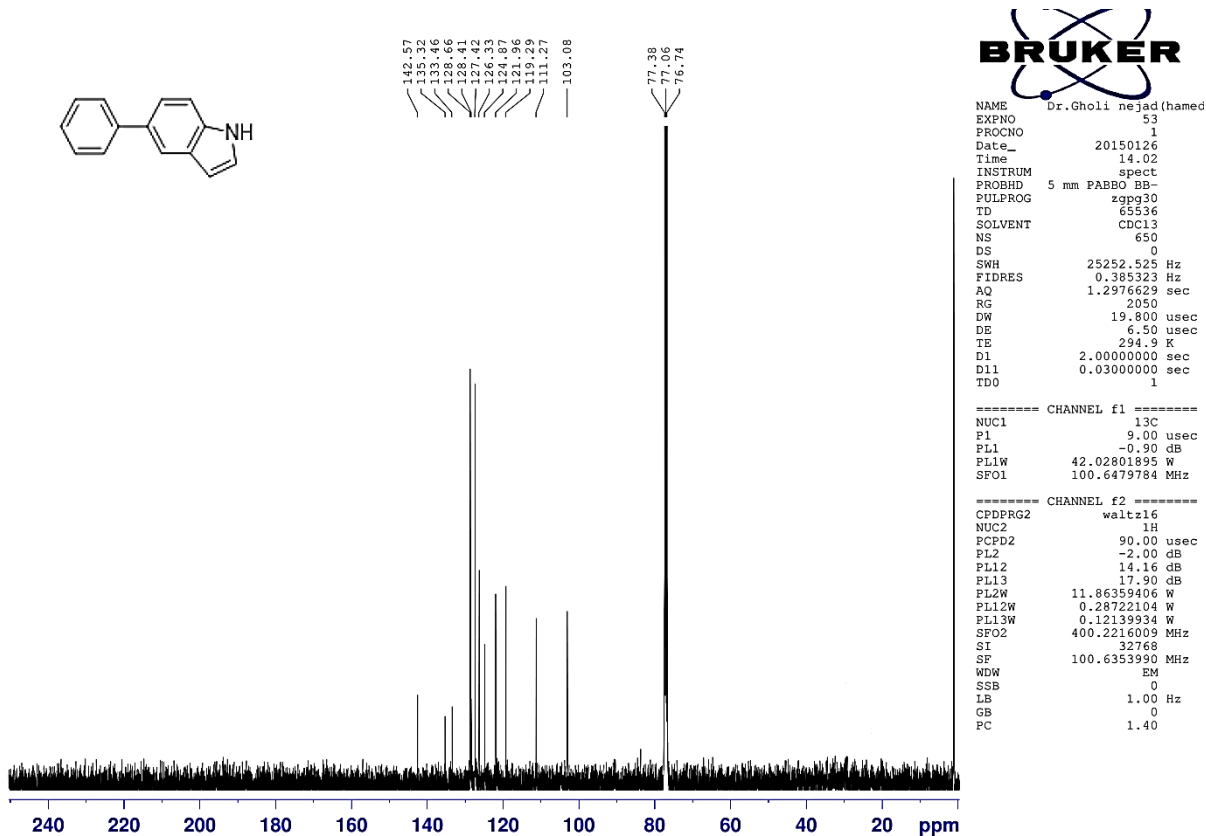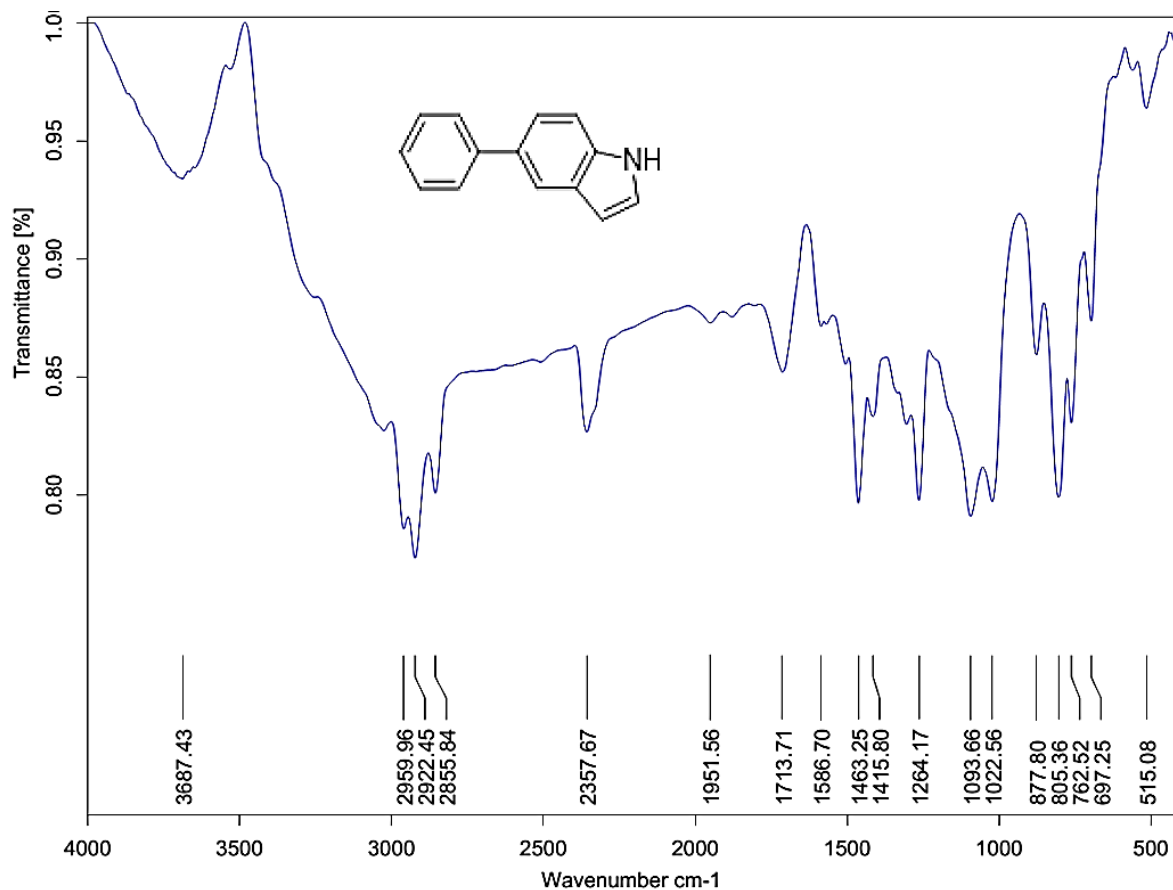

# FT-IR of 5-phenyl-1H-indole

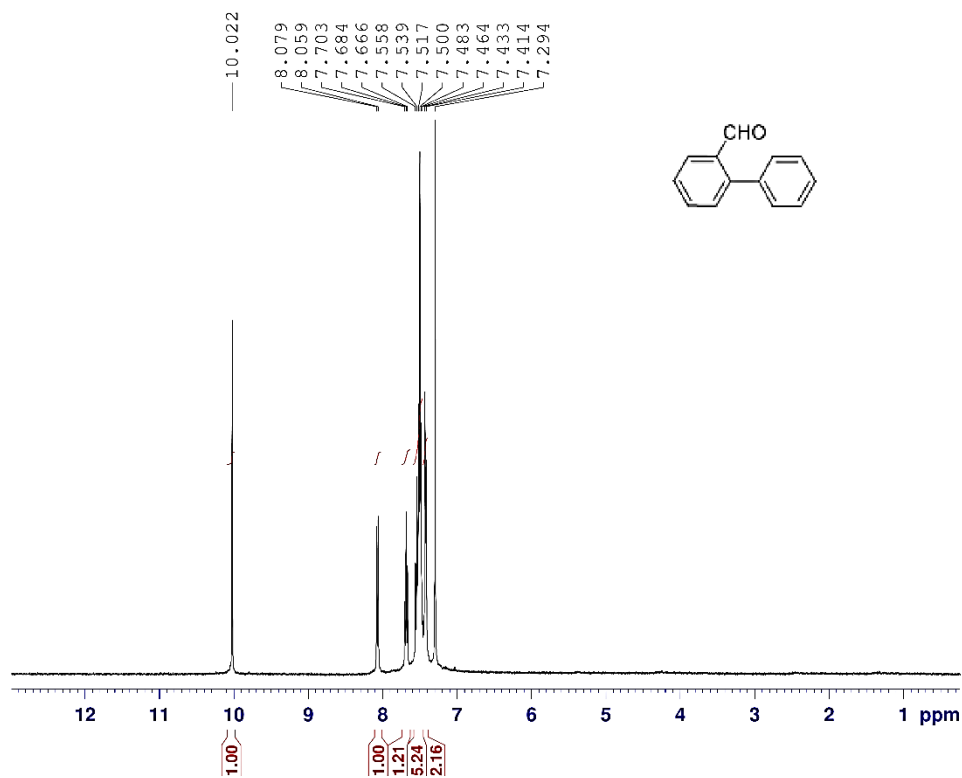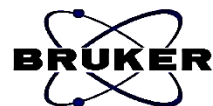

```

NAME      Dr.Gholi nejad (hamed)
EXPNO     41
PROCNO    1
Date_     20141129
Time      10.07
INSTRUM   spect
PROBHD    5 mm DABBO BB-
PULPROG   zg30
TD         65536
SOLVENT   CDCl3
NS         12
DS         0
SWH        8012.820 Hz
FIDRES     0.122266 Hz
AQ         4.0894966 sec
RG         287
DW         62.400 usec
DE         6.50 usec
TE         293.2 K
D1         6.00000000 sec
TDO        1
----- CHANNEL f1 -----
NUC1       1H
P1         14.00 usec
PL1        -2.00 dB
PL1W       11.86359406 W
SF01       400.2236020 MHz
SI         32768
SF         400.2200000 MHz
WDW        EM
SSB        0
IR         0.30 Hz
CB         0
PC         1.00
    
```

<sup>1</sup>H NMR of [1,1'-biphenyl]-2-carbaldehyde



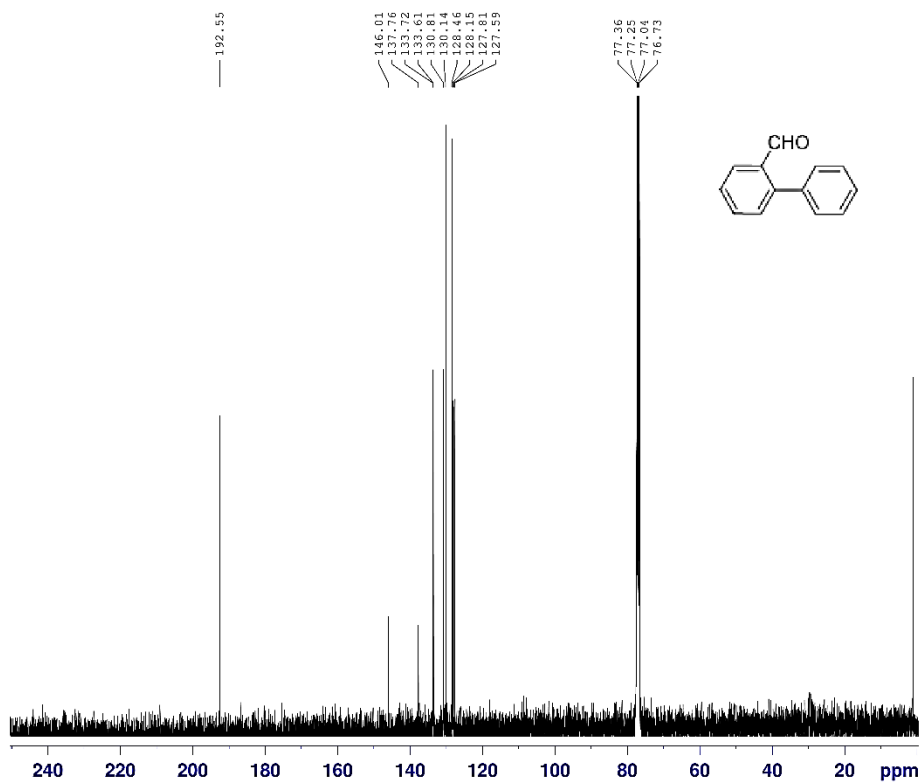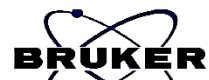

```

NAME      Dr.Gholi nejad(hamed)
EXPNO     42
PROCNO    1
Date_     20141129
Time      12.00
INSTRUM   spect
PROBHD    5 mm PARRO BH-
PULPROG   zgpg30
TD         85536
SOLVENT   CDCl3
NS         3200
DS         0
SWH        25252.525 Hz
FIDRES     0.385323 Hz
AQ         1.2976629 sec
RG         2050
DW         19.800 usec
DE         6.50 usec
TE         293.8 K
D1         2.0000000 sec
D11        0.0300000 sec
TD0        1

```

```

===== CHANNEL f1 =====
NUC1      13C
P1         9.00 usec
PL1        -0.90 dB
PL1W      42.02801895 W
SF01      100.6479784 MHz

===== CHANNEL f2 =====
CPDPRG2   waltz16
NUC2       1H
PCPD2     90.00 usec
PL2        -2.00 dB
PL12      14.16 dB
PL13      19.90 dB
PL2W      11.86359406 W
PL12W     0.28722104 W
PL13W     0.12139934 W
SFO2      400.2216009 MHz
SI         32768
SP         100.6353990 MHz
WDW        EM
SSB         0
LB         1.00 Hz
GB         0
PC         1.40

```

<sup>13</sup>C NMR of [1,1'-biphenyl]-2-carbaldehyde

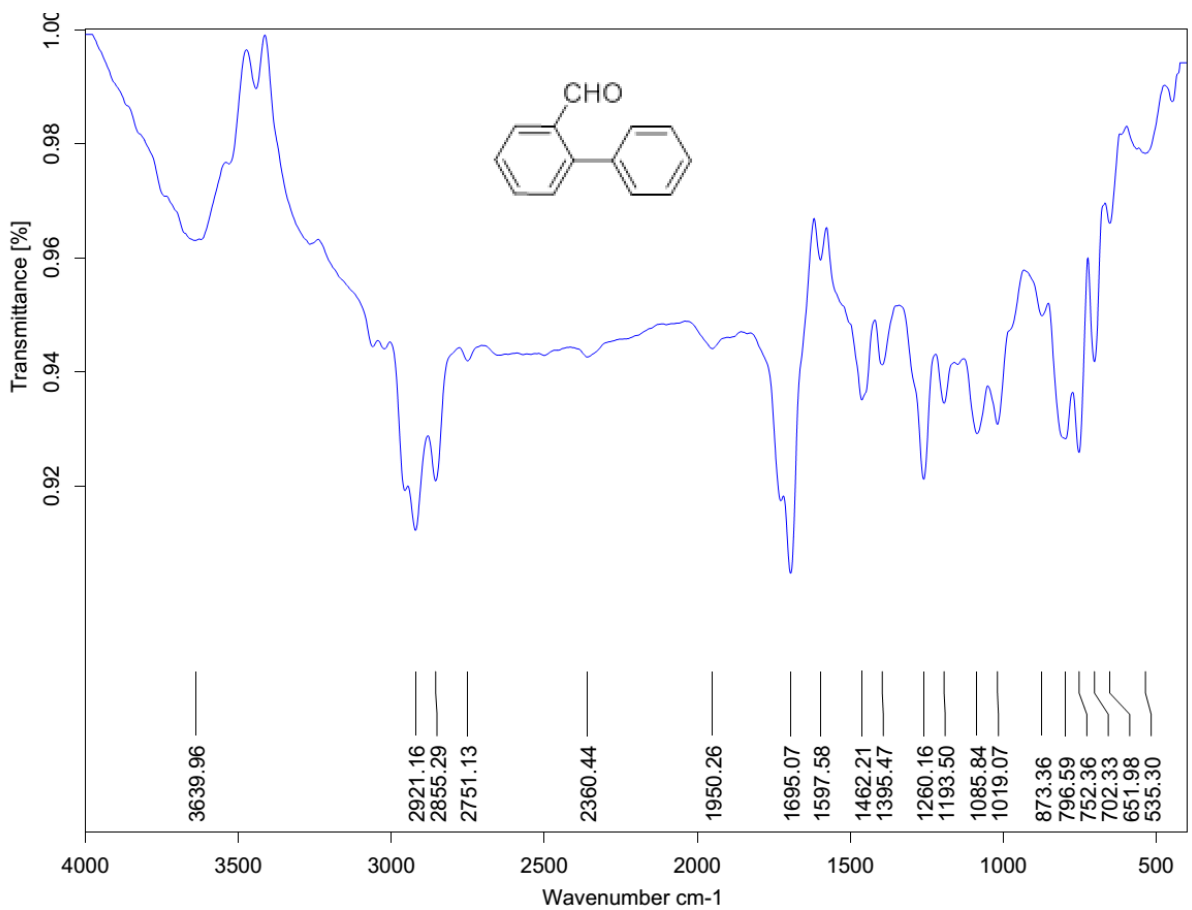

**FT-IR of [1,1'-biphenyl]-2-carbaldehyde**

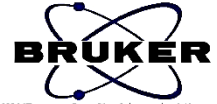

NAME Dr.Gholi nejad (hamed)  
EXPNO 92  
PROCNO 1  
Date\_ 20150307  
Time 11.14  
INSTRUM spect  
PROBHD 5 mm PABBO BB-  
PULPROG zg30  
TD 65536  
SOLVENT CDCl3  
NS 10  
DS 0  
SWH 8012.820 Hz  
FIDRES 0.122266 Hz  
AQ 4.0894966 sec  
RG 101  
DW 62.400 usec  
DE 6.50 usec  
TE 293.8 K  
D1 6.00000000 sec  
TD0 1

===== CHANNEL f1 =====  
NUC1 1H  
P1 14.00 usec  
PL1 -2.00 dB  
PL1W 11.86359406 W  
SFO1 400.2236020 MHz  
SI 32768  
SF 400.2200000 MHz  
WDW EM  
SSB 0  
LB 0.30 Hz  
GB 0  
PC 1.00

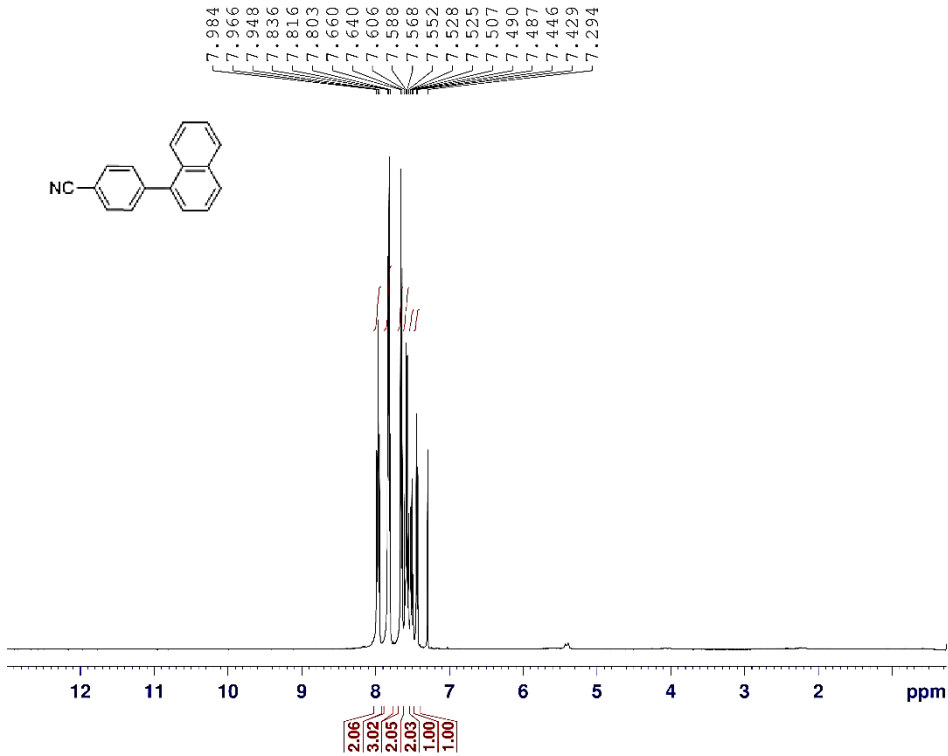

<sup>1</sup>H NMR of 4-(naphthalen-1-yl)benzotrile

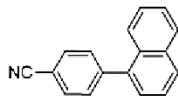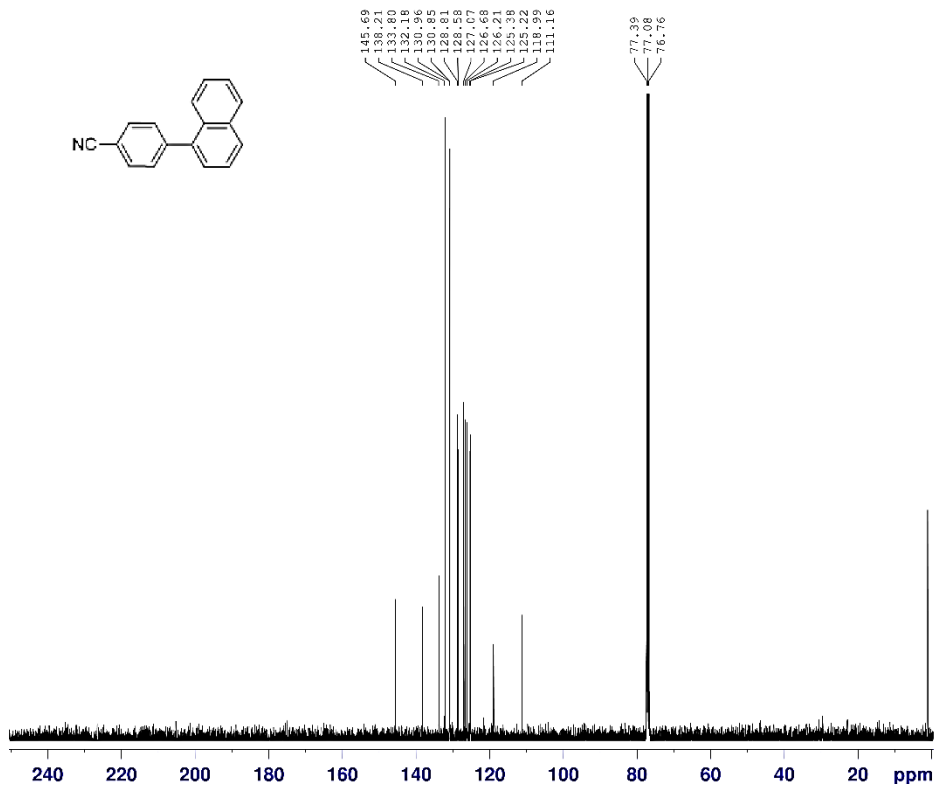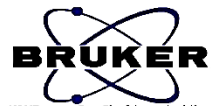

```

NAME      Dr.Gholi nejad(hamed)
EXPNO    93
PROCNO   1
Date_    20150307
Time     11.18
INSTRUM  spect
PROBHD   5 mm PABBO BB-
PULPROG  zgpg30
TD       65536
SOLVENT  CDC13
NS       210
DS       0
SWH      25252.525 Hz
FIDRES   0.385323 Hz
AQ       1.2976629 sec
RG       2050
DW       19.800 usec
DE       6.50 usec
TR       294.1 K
D1       2.0000000 sec
D11      0.0300000 sec
TD0      1

----- CHANNEL f1 -----
NUC1     13C
P1       9.00 usec
PL1     -0.90 dB
PL1W    42.02801895 W
SFO1    100.6479784 MHz

===== CHANNEL f2 =====
CPDPRG2  waltz16
NUC2     1H
DCPDZ   90.00 usec
PL2     -2.00 dB
PL12    14.16 dB
DL13    17.90 dB
PL2W    11.86359406 W
PL12W   0.28722104 W
PL13W   0.12139934 W
SFO2    400.2216009 MHz
SI      32768
SF      100.6353990 MHz
WDW     PM
SSB     0
LB      1.00 Hz
GB      0
PC      1.40

```

<sup>13</sup>C NMR of 4-(naphthalen-1-yl)benzonitrile

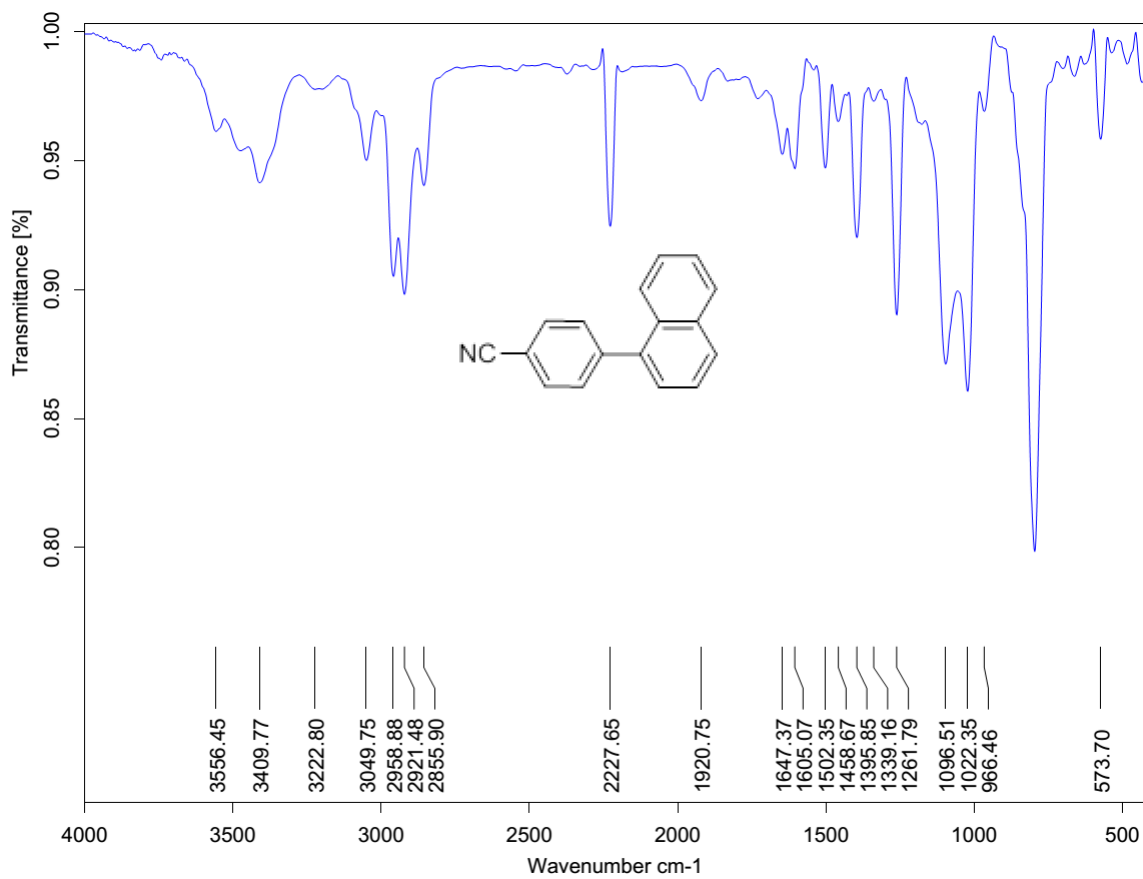

**FT-IR of 4-(naphthalen-1-yl)benzonitrile**

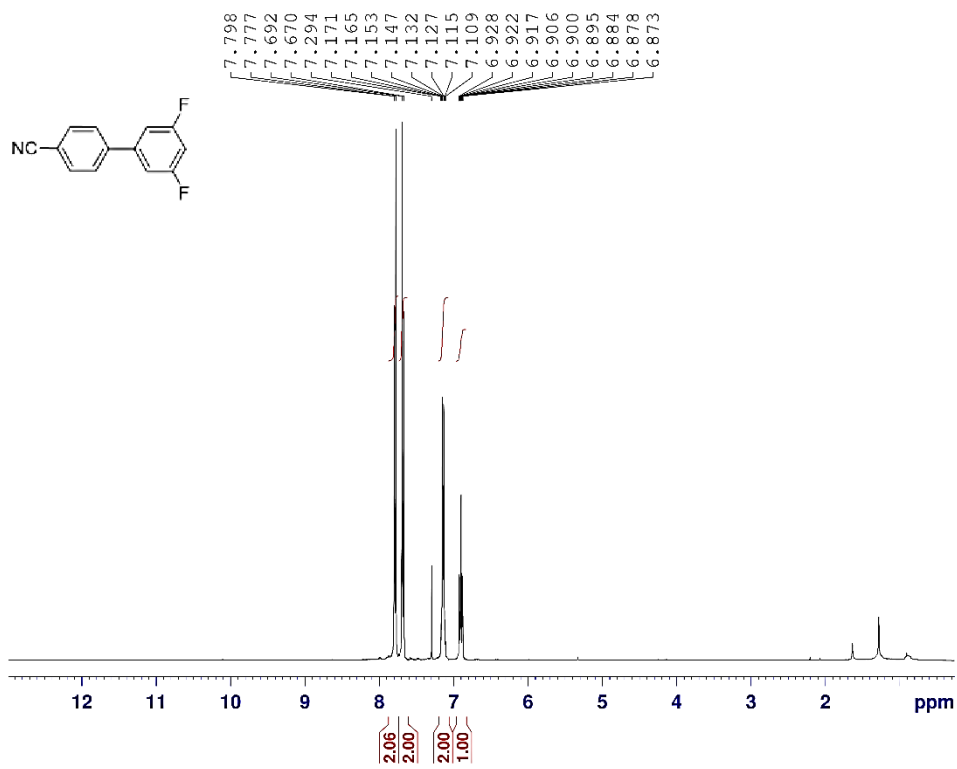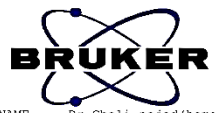

```

NAME          Dr.Gholi nejad(hamed)
EXPNO         94
PROCNO        1
Date_         20150307
Time          11.32
INSTRUM       spect
PROBHD        5 mm PABBO BB-
PULPROG       zg30
TD            65536
SOLVENT       CDCl3
NS            11
DS            0
SWH           8012.820 Hz
FIDRES        0.122266 Hz
AQ            4.0894966 sec
RG            101
BW            62.400 usec
DE            6.50 usec
TE            294.0 K
D1            6.0000000 sec
TD0           1

===== CHANNEL f1 =====
NUC1          1H
P1            14.00 usec
PL1           -2.00 dB
PL1W         11.86359406 W
SFO1          400.2236020 MHz
SI            32768
SF            400.2200000 MHz
WDW           EM
SSB           0
LB            0.30 Hz
GB            0
PC            1.00

```

<sup>1</sup>H NMR of 3',5'-difluoro-[1,1'-biphenyl]-4-carbonitrile

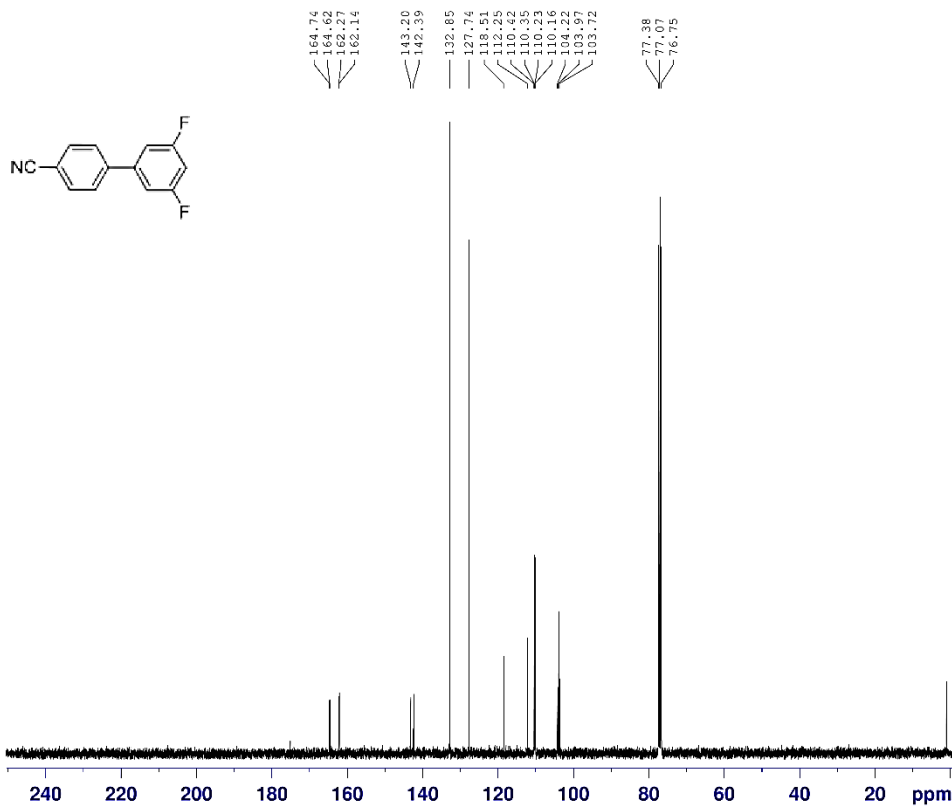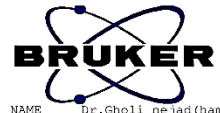

```

NAME          Dr.Gho11 nejad (hamed)
EXPNO         95
PROCNO        1
Date_         20150307
Time          11.38
INSTRUM       spect
PROBHD        5 mm PABBO BH-
PULPROG       zgpg30
TD            65536
SOLVENT       CDCl3
NS            700
DS            0
SWH           25252.525 Hz
FIDRES        0.385323 Hz
AQ            1.2976629 sec
RG            2050
DW            19.800 usec
DE            6.50 usec
TE            294.3 K
D1            2.00000000 sec
D11           0.03000000 sec
TD0           1

===== CHANNEL f1 =====
NUC1          13C
P1            9.00 usec
PL1           -0.90 dB
PL1W          42.02801895 W
SFO1         100.6479784 MHz

===== CHANNEL f2 =====
CPDPRG2      waltz16
NUC2          1H
PCPD2        90.00 usec
PL2           -2.00 dB
PL12         14.16 dB
PL13         17.90 dB
PL2W          11.86359406 W
PL12W         0.28722104 W
PL13W         0.12139934 W
SFO2         400.2216009 MHz
SI            32768
SF           100.6353990 MHz
WDW           EM
SSB           0
LB            1.00 Hz
GB            0
PC            1.40

```

<sup>13</sup>C NMR of 3',5'-difluoro-[1,1'-biphenyl]-4-carbonitrile

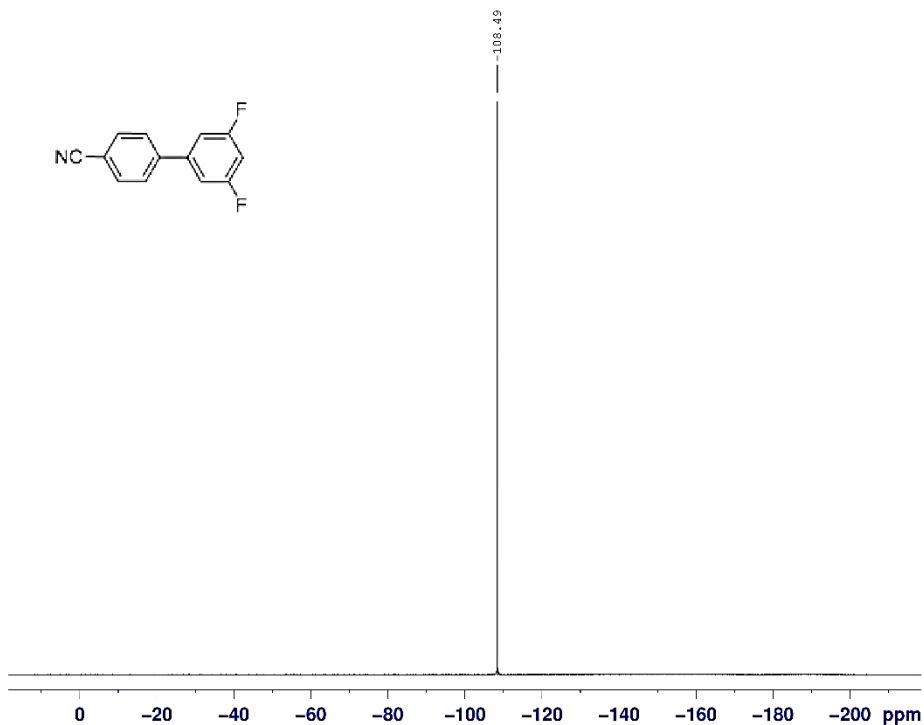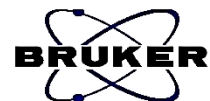

```

NAME: Dr.Guo11 nejad(named)
EXPNO 109
PROCNO 1
Date_ 20150408
Time 15.51
INSTRUM spect
PROBHD 5 mm PABBO BB-
PULPROG zgpg30
TD 131072
SOLVENT CDCl3
NS 15
DS 0
SWH 89285.711 Hz
FIDRES 0.681196 Hz
AQ 0.7340532 sec
RG 2050
DW 5.600 usec
DE 6.50 usec
TE 295.1 K
D1 1.0000000 sec
D12 0.0300000 sec
D13 0.0000200 sec
TD0 1

```

```

===== CHANNEL f1 =====
NUC1 19F
P1 14.00 usec
PL1 -2.40 dB
PL1W 14.31771946 W
SFO1 376.5453925 MHz

```

```

===== CHANNEL f2 =====
CPDPRG2 waltz16
NUC2 1H
PCPD2 90.00 usec
PL2 -2.00 dB
PL12 14.48 dB
PL2W 11.86359406 W
PL12W 0.26681873 W
SFO2 400.2216009 MHz
SI 65536
SF 376.5830510 MHz
WDW EM
SSB 0
LB 0.30 Hz
GB 0
PC 1.00

```

**<sup>19</sup>F NMR of 3',5'-difluoro-[1,1'-biphenyl]-4-carbonitrile**



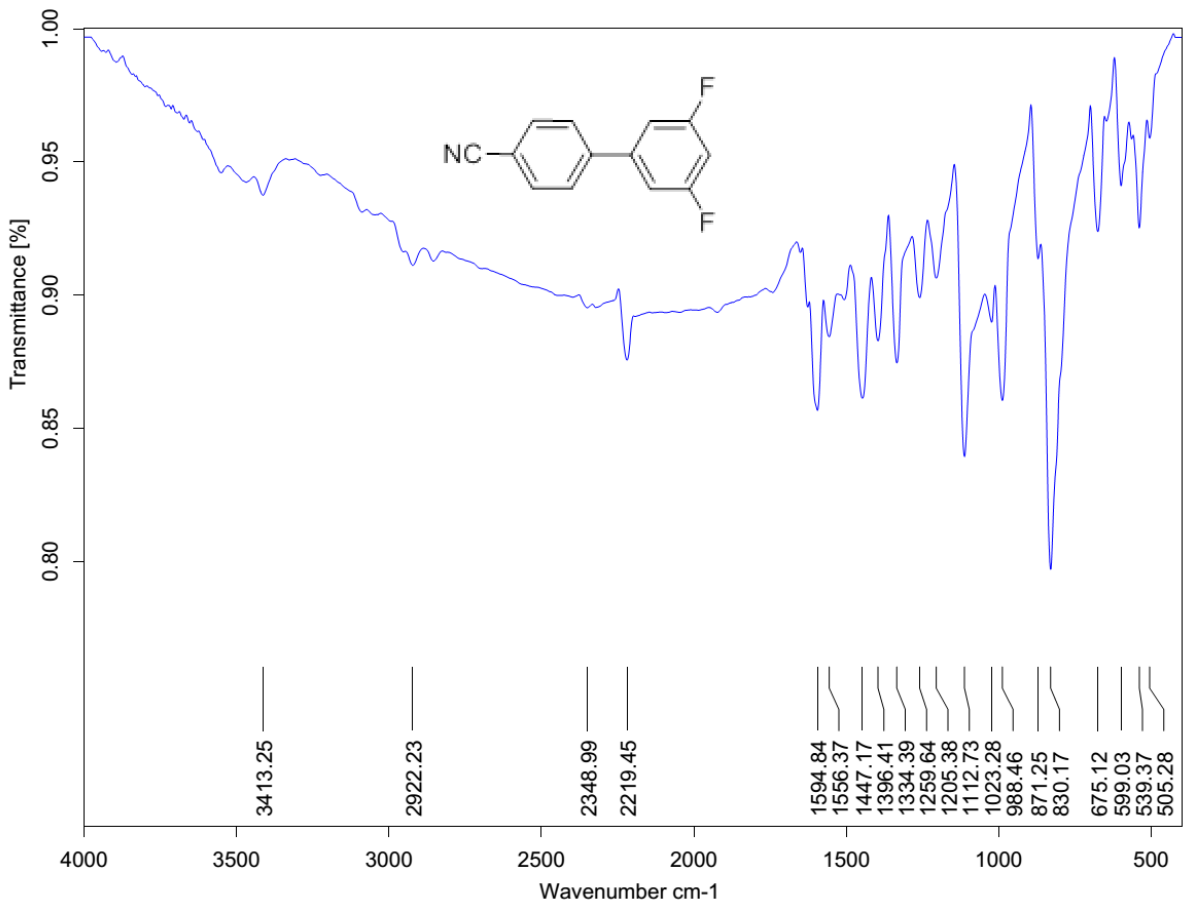

**FT-IR of 3',5'-difluoro-[1,1'-biphenyl]-4-carbonitrile**

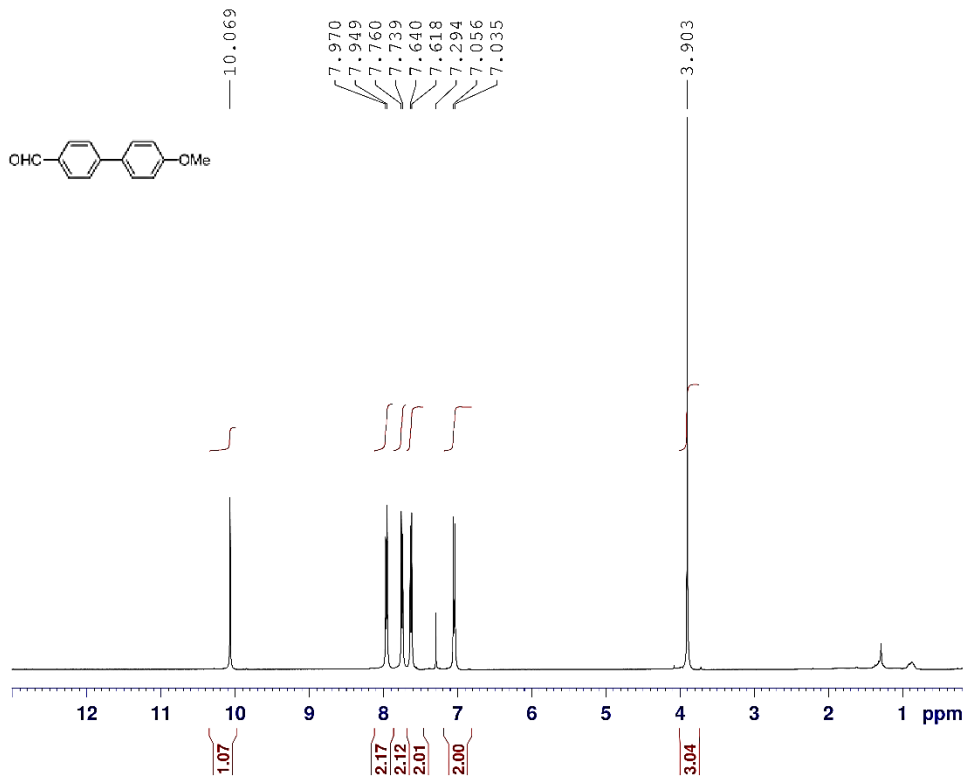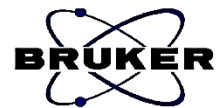

Dr.Gholi nejad(hamed)

|         |                |
|---------|----------------|
| NMRE    | 88             |
| EXPNO   | 1              |
| PROCNO  | 20150308       |
| Date_   | 7.49           |
| Time    | spect          |
| INSTRUM | 5 mm F4BBO BB- |
| PROBHD  | zg30           |
| PULPROG | 65536          |
| TD      | CDC13          |
| SOLVENT | 9              |
| NS      | 0              |
| DS      | 8012.820 Hz    |
| SMH     | 0.122266 Hz    |
| FIDRES  | 4.0894966 sec  |
| AQ      | 161            |
| RG      | 62.400 usec    |
| DW      | 6.50 usec      |
| DE      | 294.4 K        |
| TE      | 6.00000000 sec |
| D1      | 1              |
| TD0     |                |

----- CHANNEL f1 -----

|      |                 |
|------|-----------------|
| NUC1 | 1H              |
| P1   | 14.00 usec      |
| PL1  | -2.00 dB        |
| PL1W | 11.86359406 W   |
| SFO1 | 400.2236020 MHz |
| SI   | 32768           |
| SF   | 400.2200000 MHz |
| WDW  | EM              |
| SSB  | 0               |
| LB   | 0.30 Hz         |
| CB   | 0               |
| PC   | 1.00            |

<sup>1</sup>H NMR of 4'-methoxy-[1,1'-biphenyl]-4-carbaldehyde

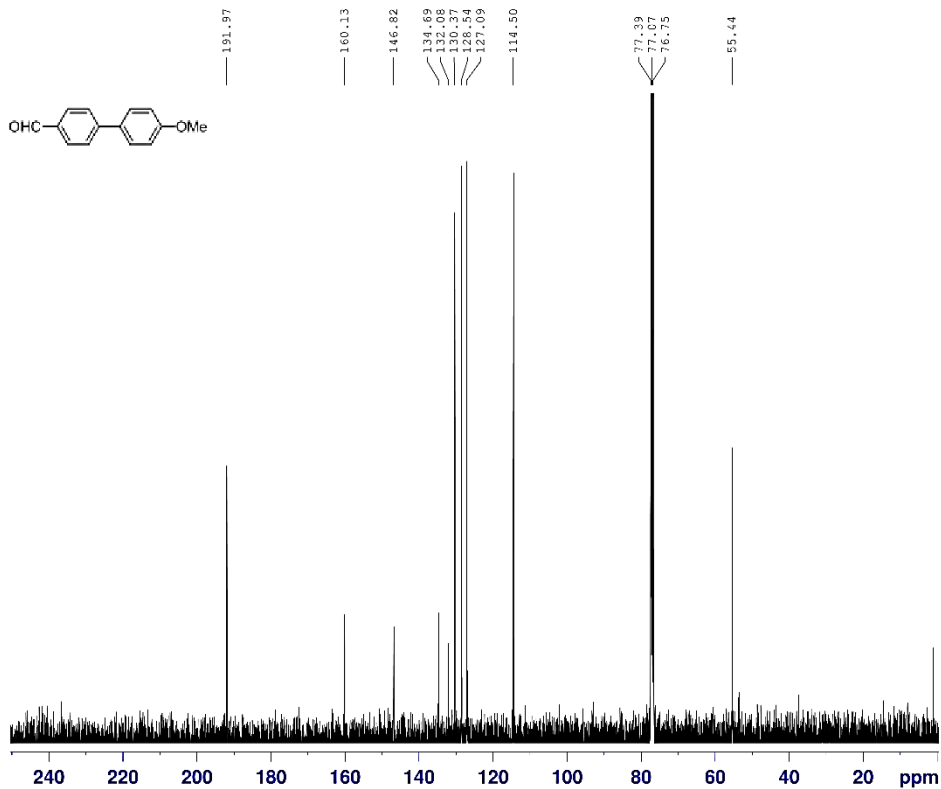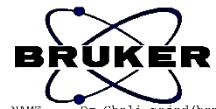

```

NAME      Dr.Gholi nejad (hamed)
EXFNO    89
PROCNO   1
Date_    20150307
Time     10.31
INSTRUM  spect
PROBHD   5 mm PABBO BB-
PULPROG  zgpg30
TD       65536
SOLVENT  CDCl3
NS       200
DS       0
SWH      25252.525 Hz
FIDRES   0.385323 Hz
AQ       1.2976629 sec
RG       2050
DM       19.800 usec
DE       6.50 usec
TE       293.8 K
D1       2.0000000 sec
D11      0.0300000 sec
TD0      1

===== CHANNEL f1 =====
NUC1     13C
P1       9.00 usec
PL1      -0.90 dB
PL1W    42.02801895 W
SFO1    100.6479784 MHz

===== CHANNEL f2 =====
CPDPRG2  waltz16
NUC2     1H
PCPD2   90.00 usec
PL2      -2.00 dB
PL12    14.16 dB
PL13    17.90 dB
PL12W   11.06359406 W
PL12W   0.28722104 W
PL13W   0.12139934 W
SFO2    400.2216009 MHz
SI       32768
SF       100.6353990 MHz
WDW      EM
SSB      0
LB       1.00 Hz
GB       0
PC       1.40

```

<sup>13</sup>C NMR of 4'-methoxy-[1,1'-biphenyl]-4-carbaldehyde

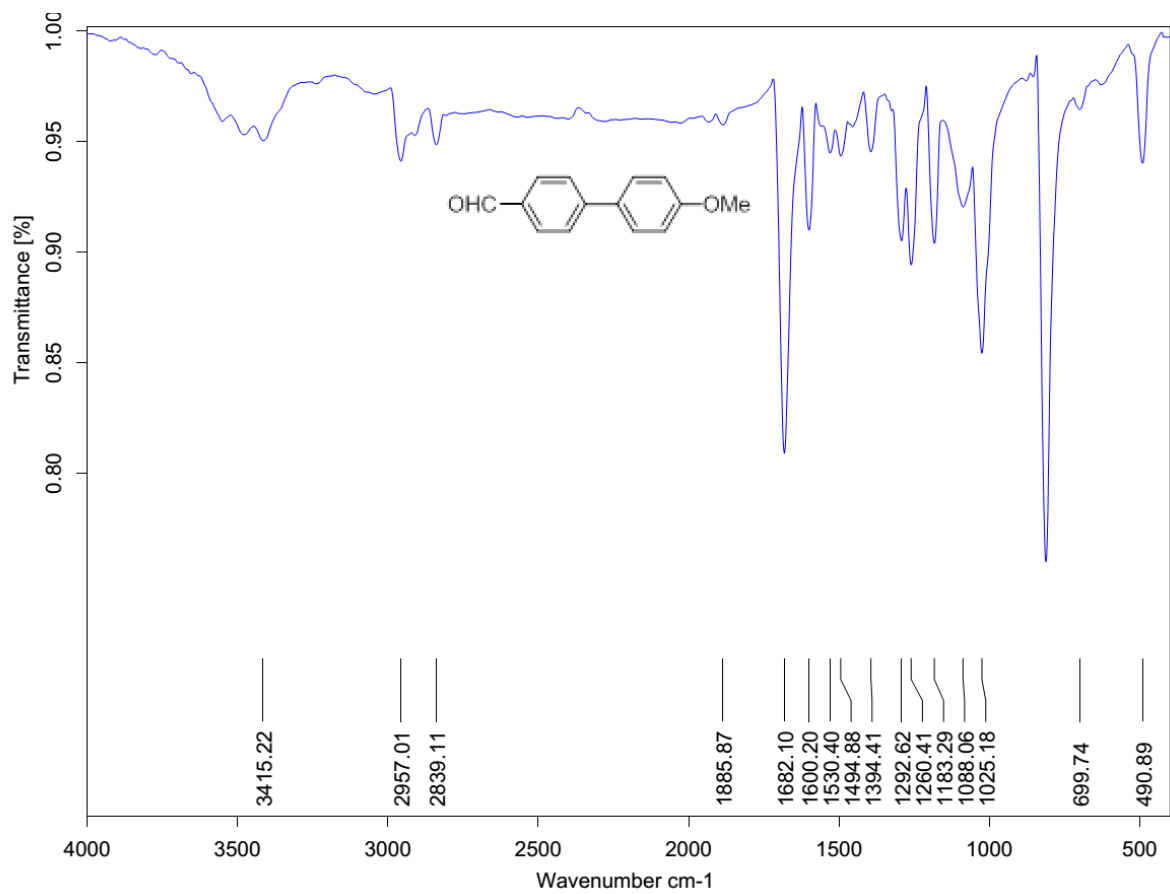

**FT-IR of 4'-methoxy-[1,1'-biphenyl]-4-carbaldehyde**

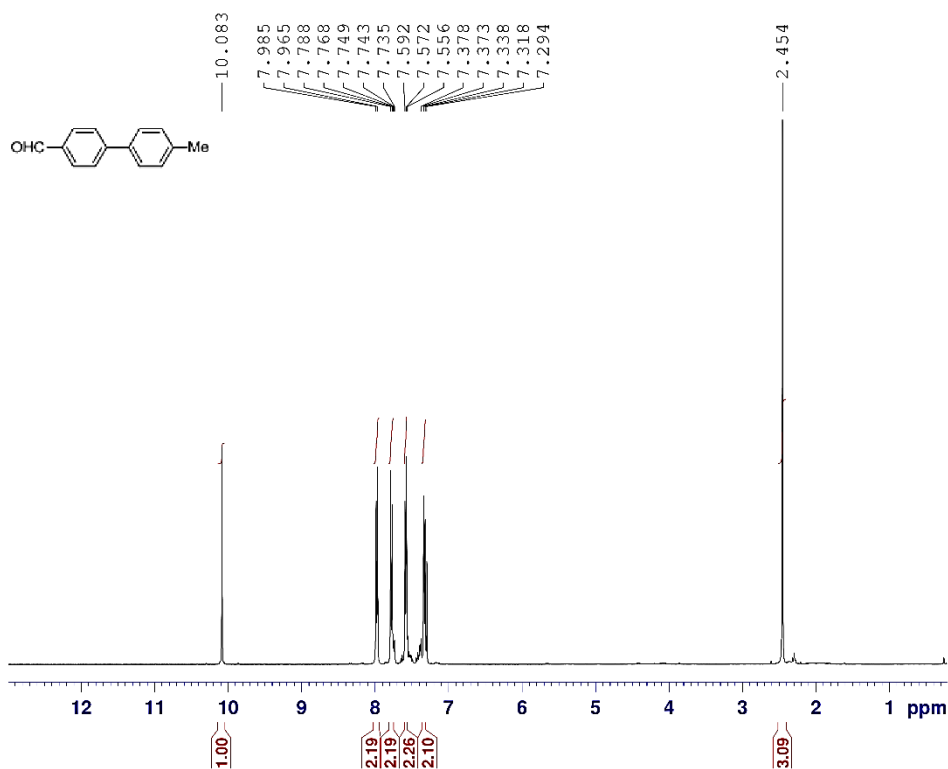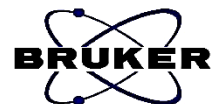

```

NAME      Dr.Gholi nejad (hamed)
EXPNO     100
PROCNO    1
Date_     20150311
Time      10.30
INSTRUM   spect
PROBHD    5 mm PABBO BB-
PULPROG   zg30
TD         65536
SOLVENT   CDCl3
NS         12
DS         0
SWH        8012.820 Hz
FIDRES    0.122266 Hz
AQ         4.0894966 sec
RG         128
DW         62.400 usec
DE         6.50 usec
TE         294.4 K
D1         6.00000000 sec
TD0        1
  
```

```

----- CHANNEL f1 -----
NUC1      1H
P1         14.00 usec
PL1        -2.00 dB
PL1W       11.86359406 W
SFO1       400.2236020 MHz
SI         32768
SF         400.2200000 MHz
WDW        EM
SSB         0
LB         0.30 Hz
GB         0
PC         1.00
  
```

<sup>1</sup>H NMR of 4'-methyl-[1,1'-biphenyl]-4-carbaldehyde

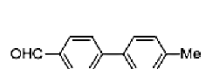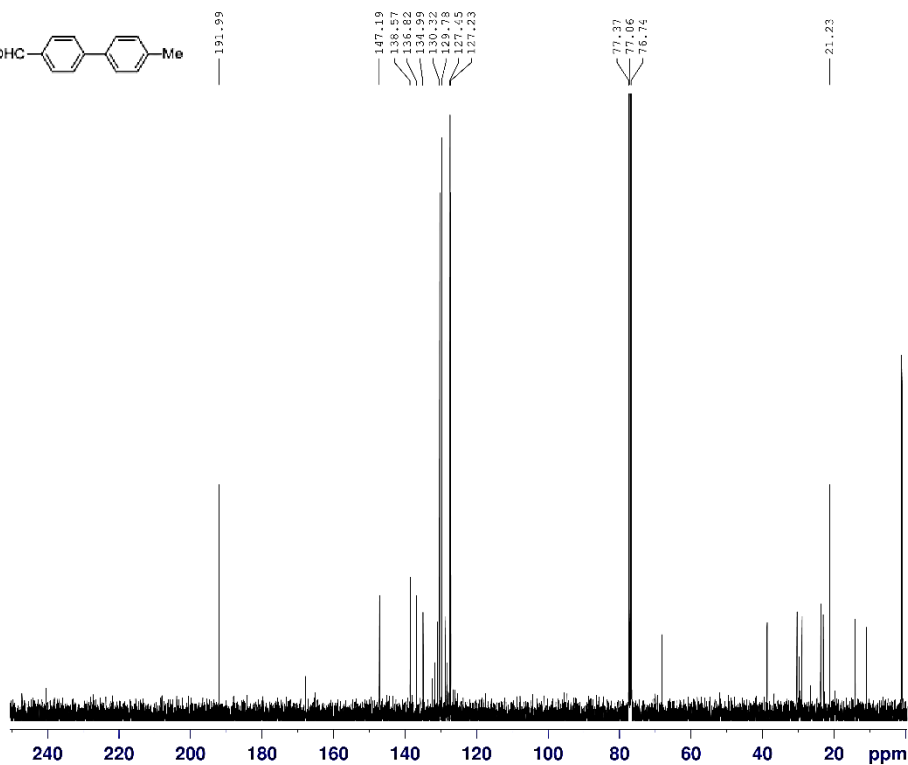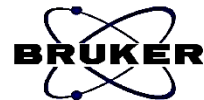

```

NAME      Dr.Choli nejad (hamed)
EXPNO     101
PROCNO    1
Date_     20150311
Time      10.32
INSTRUM   spect
PROBHD    5 mm PABBO BB-
PULPROG   zgpg30
TD         65536
SOLVENT   CDCl3
NS         201
DS         0
SWH        25252.525 Hz
FIDRES     0.385323 Hz
AQ         1.2976629 sec
RG         2050
DE         19.800 usec
DR         6.50 usec
TE         294.5 K
D1         2.0000000 sec
D11        0.0300000 sec
TDO        1
  
```

```

===== CHANNEL f1 =====
NUC1      13C
P1         9.00 usec
PL1        -0.90 dB
PLLW       42.02801895 W
SFO1      100.6479784 MHz
  
```

```

===== CHANNEL f2 =====
CPDPRG2   waltz16
NUC2      1H
PCPD2     90.00 usec
PL2        -2.00 dB
PL12       14.16 dB
PL13       17.90 dB
PL2W       11.86359406 W
PL12W      0.28722104 W
PL13W      0.12135994 W
SFO2      400.2216009 MHz
SI         32768
SF         100.6353990 MHz
WDW        EM
SSB         0
LB         1.00 Hz
GB         0
PC         1.40
  
```

<sup>13</sup>C NMR of 4'-methyl-[1,1'-biphenyl]-4-carbaldehyde

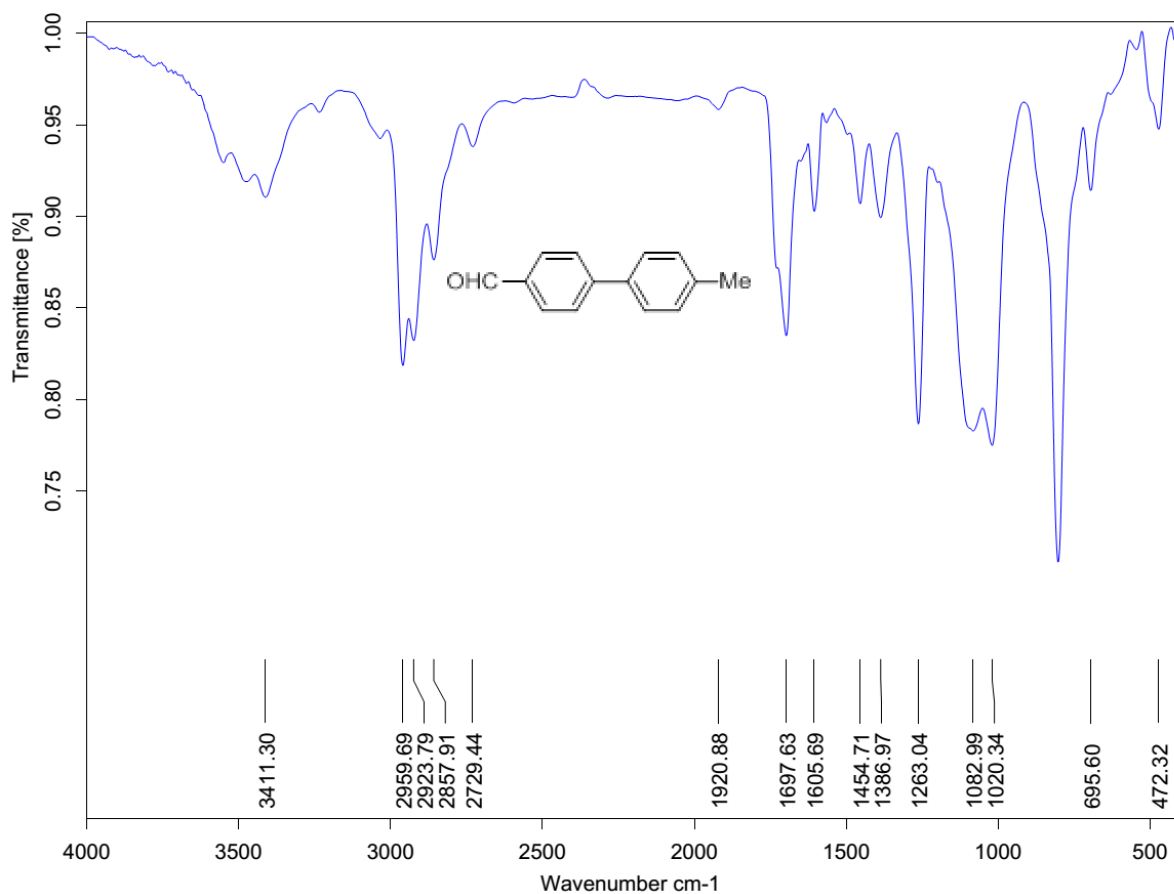

**FT-IR of 4'-methyl-[1,1'-biphenyl]-4-carbaldehyde**

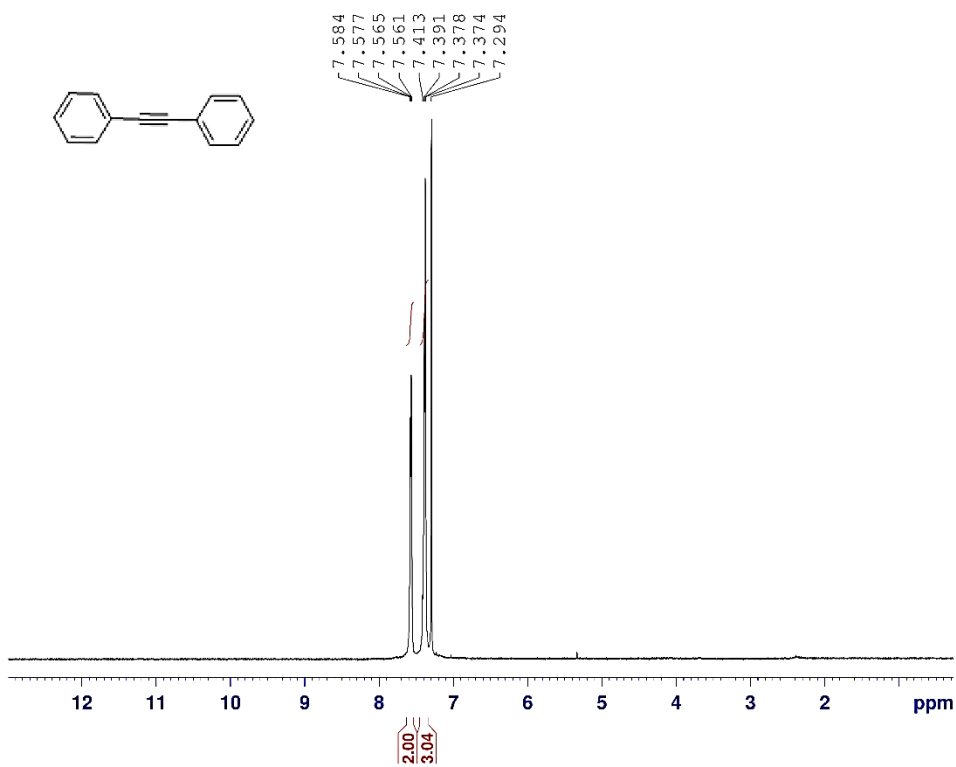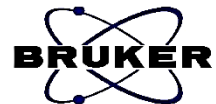

NAME Dr.Gholi nejad (hamed)  
 EXPNO 1  
 PROCNO 58  
 Date\_ 20150202  
 Time 12.12  
 INSTRUM spect  
 PROBHD 5 mm PABBO BB-  
 PULPROG zg30  
 TD 65536  
 SOLVENT CDCl3  
 NS 12  
 DS 0  
 SWH 8012.820 Hz  
 FIDRES 0.122266 Hz  
 AQ 4.0894966 sec  
 RG 322  
 DW 62.400 usec  
 DE 6.50 usec  
 TE 294.3 K  
 D1 6.00000000 sec  
 TDO 1

----- CHANNEL f1 -----  
 NUC1 1H  
 P1 14.00 usec  
 P11 -2.00 dB  
 P11W 11.86359406 W  
 SF01 400.2236020 MHz  
 S1 32768  
 SF 400.2200000 MHz  
 WDW EM  
 SSB 0  
 LB 0.30 Hz  
 GB 0  
 FC 1.00

<sup>1</sup>H NMR of 1,2-diphenylethyne



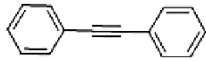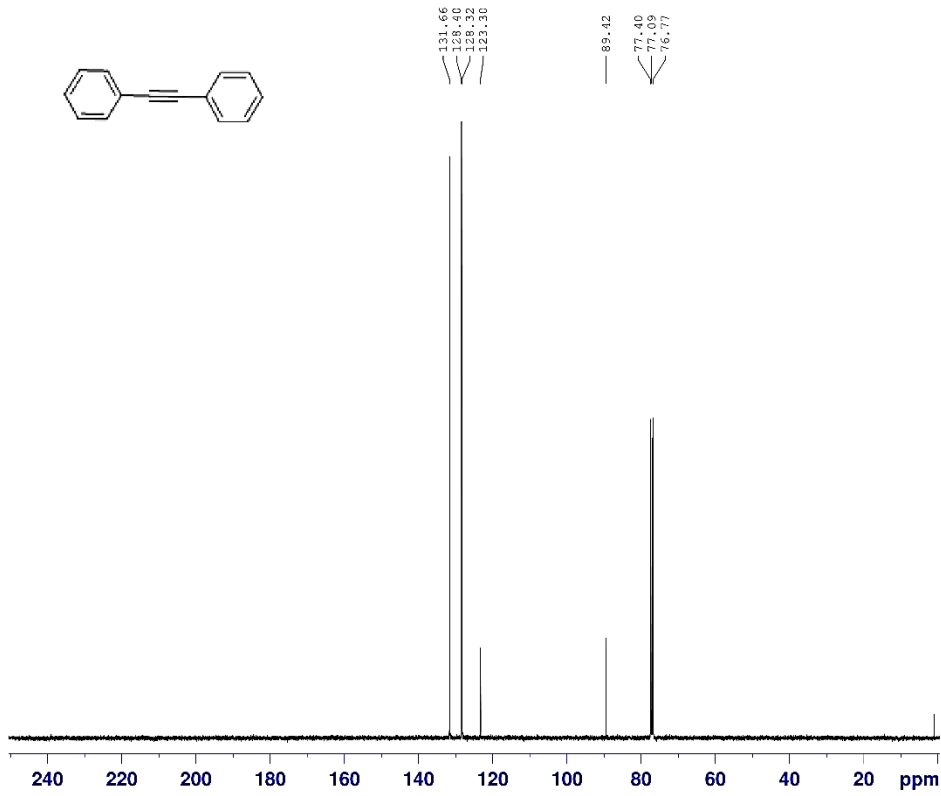

<sup>13</sup>C NMR of 1,2-diphenylethyne

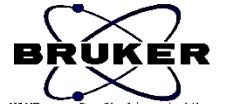

Dr. Gholi. nejad(hamed)

```

NAME          Dr. Gholi. nejad(hamed)
EXPNO         79
PROCNO        1
Date_         20150225
Time          10.32
INSTRUM       spect
PROBHD        5 mm PABBO BB-
PULPROG       zgpg30
TD            65536
SOLVENT       CDCl3
NS            240
DS            0
SWH           25252.525 Hz
FIDRES        0.385323 Hz
AQ            1.2976629 sec
RG            2050
DW            19.800 usec
DE            6.50 usec
TE            293.2 K
D1            2.0000000 sec
D11           0.0300000 sec
TD0           1

===== CHANNEL f1 =====
NUC1           13C
P1             9.00 usec
PL1           -0.90 dB
PL1W          42.02801895 W
SFO1          100.6479784 MHz

===== CHANNEL f2 =====
CDDPRG2       waltz16
NUC2           1H
PCPD2         90.00 usec
PL2           -2.00 dB
PL12          14.16 dB
PL13          17.90 dB
PL1W          11.86359406 W
PL12W         0.28722104 W
PL13W         0.12139934 W
SFO2          400.2216009 MHz
SI            32768
SF            100.6353990 MHz
WDW           RM
SSB           0
LB            1.00 Hz
GB            0
PC            1.40

```

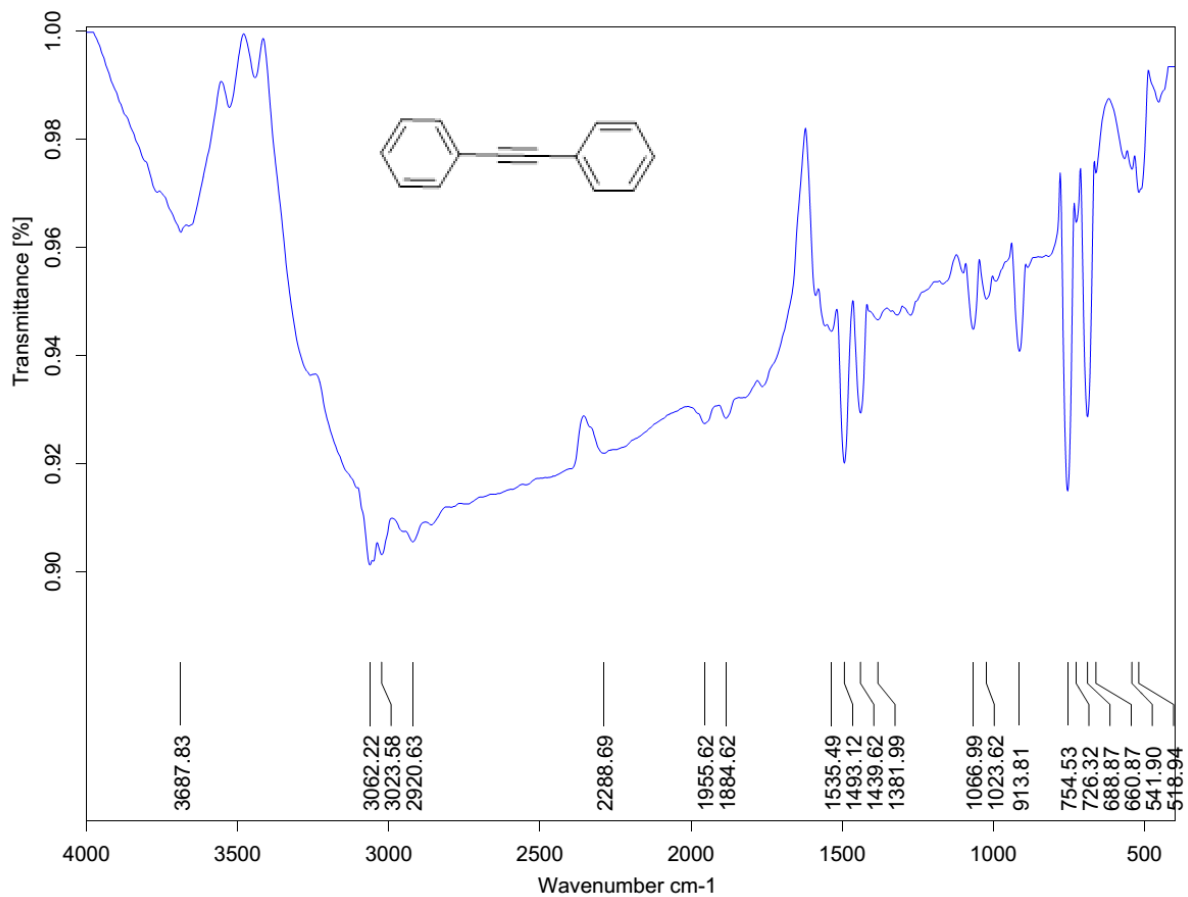

**FT-IR of 1,2-diphenylethyne**

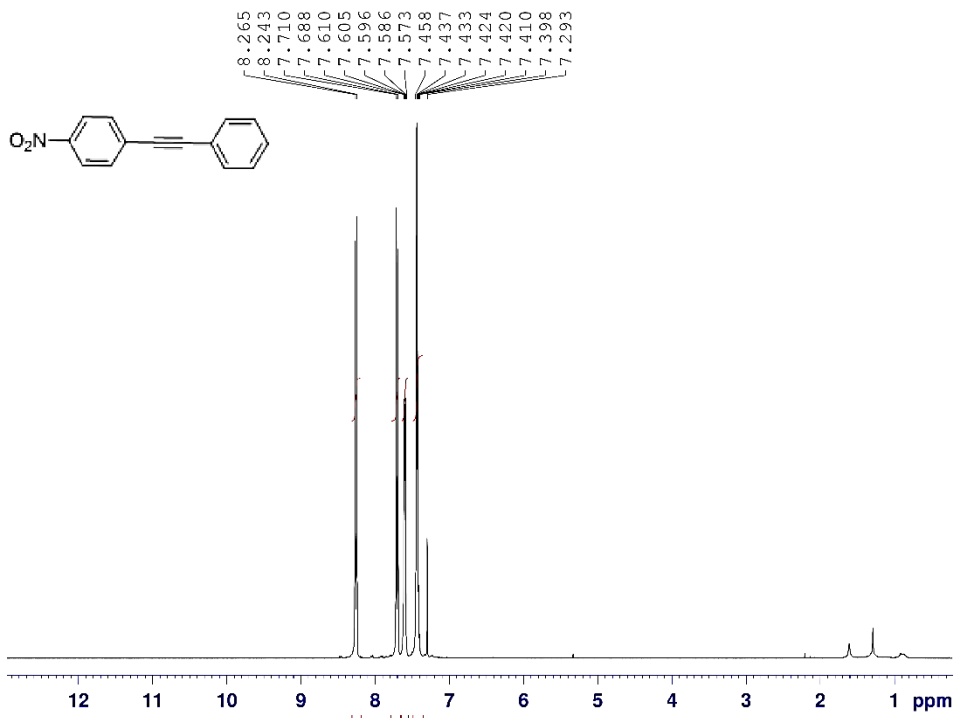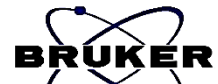

NAME Dr.Gholi nejad (hamed)  
 EXPNO 60  
 PROCNO 1  
 Date\_ 20150202  
 Time 12.25  
 INSTRUM spect  
 PROBHD 5 mm PABBO BB-  
 PULPROG zg30  
 TD 65536  
 SOLVENT CDCl3  
 NS 9  
 DS 0  
 SWH 8012.820 Hz  
 FIDRES 0.122266 Hz  
 AQ 4.0894966 sec  
 RG 161  
 DW 62.400 usec  
 DE 6.50 usec  
 TE 294.2 K  
 D1 6.0000000 sec  
 TD0 1

----- CHANNEL f1 -----  
 NUC1 1H  
 P1 14.00 usec  
 PL1 -2.00 dB  
 PLLW 11.86359406 W  
 SF01 400.2236020 MHz  
 SI 32768  
 SF 400.2200000 MHz  
 WDW EM  
 SSB 0  
 LB 0.30 Hz  
 GB 0  
 PC 1.00

<sup>1</sup>H NMR of 1-nitro-4-(phenylethynyl)benzene

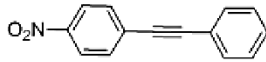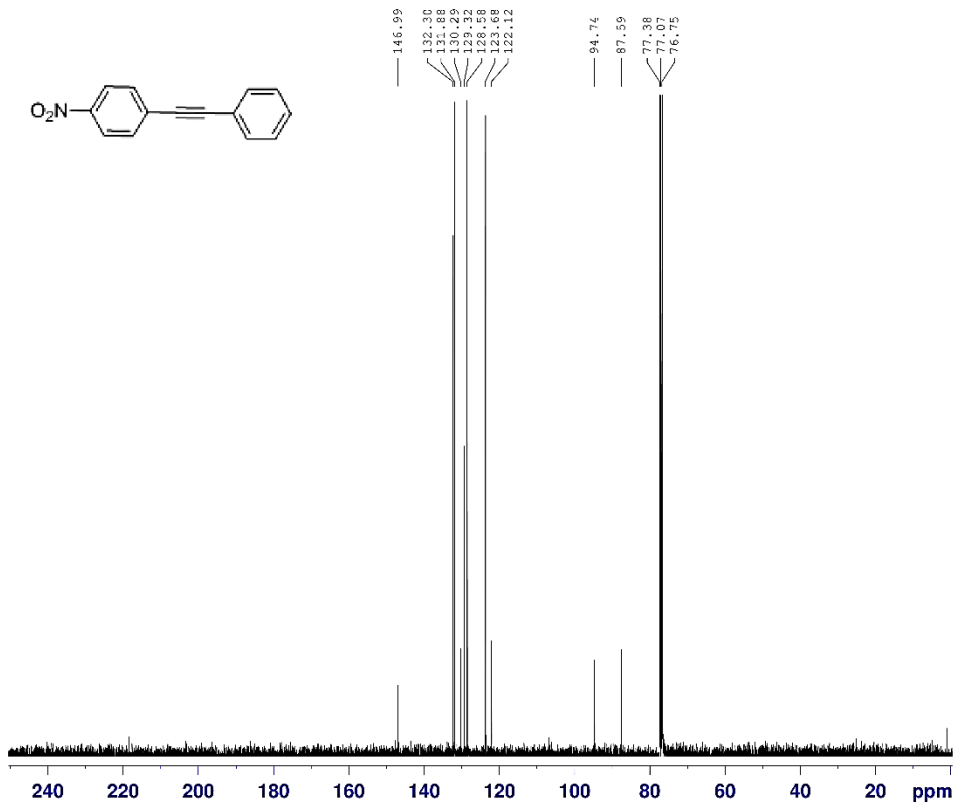

<sup>13</sup>C NMR of 1-nitro-4-(phenylethynyl)benzene

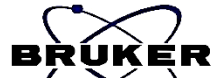

```

NAME      Dr.Gholi nejad (hamed)
EXPNO    1
PROCNO   1
Date_    20150202
Time     12.29
INSTRUM  spect
PROBHD   5 mm PABBO BB-
PULPROG  zgpg30
TD       65536
SOLVENT  CDCl3
NS       100
DS       0
SWH      25252.525 Hz
FIDRES   0.385323 Hz
AQ       1.2976629 sec
RG       2050
DW       19.800 usec
DE       6.50 usec
TE       294.5 K
D1       2.00000000 sec
D11      0.03000000 sec
TD0      1

----- CHANNEL f1 -----
NUC1     13C
P1       9.00 usec
PL1     -0.90 dB
PL1W    42.02801895 W
SF01    100.6479784 MHz

----- CHANNEL f2 -----
CPDPRG2  waltz16
NUC2     1H
PCPD2   90.00 usec
PL2     -2.00 dB
PL12    14.16 dB
PL13    17.90 dB
PL2W    11.86359406 W
PL12W   0.28722104 W
PL13W   0.12139934 W
SF02    400.2216009 MHz
SI       32768
SF      100.6353990 MHz
WDW     EM
SSB     0
LB      1.00 Hz
GB      0
PC      1.40

```

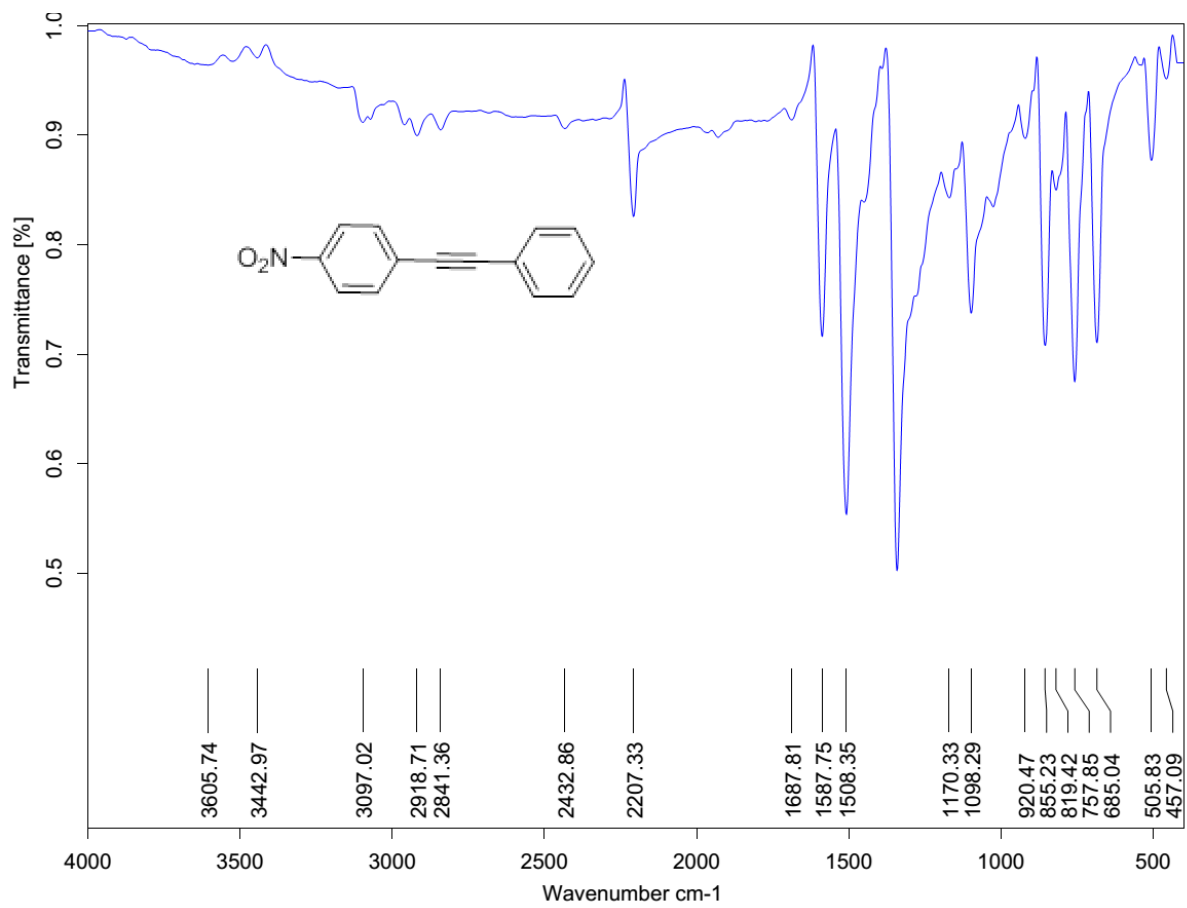

**FT-IR of 1-nitro-4-(phenylethynyl)benzene**

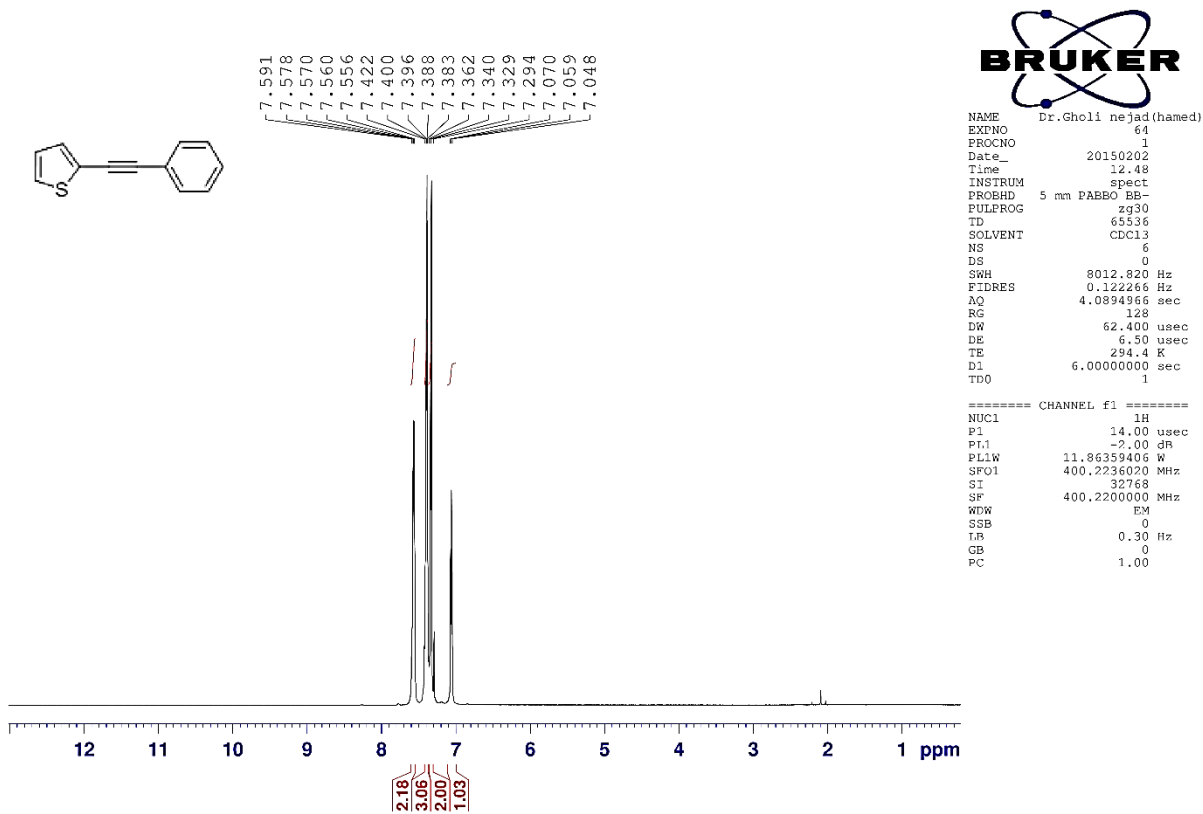

**<sup>1</sup>H NMR of 2-(phenylethynyl)thiophene**

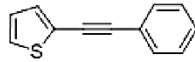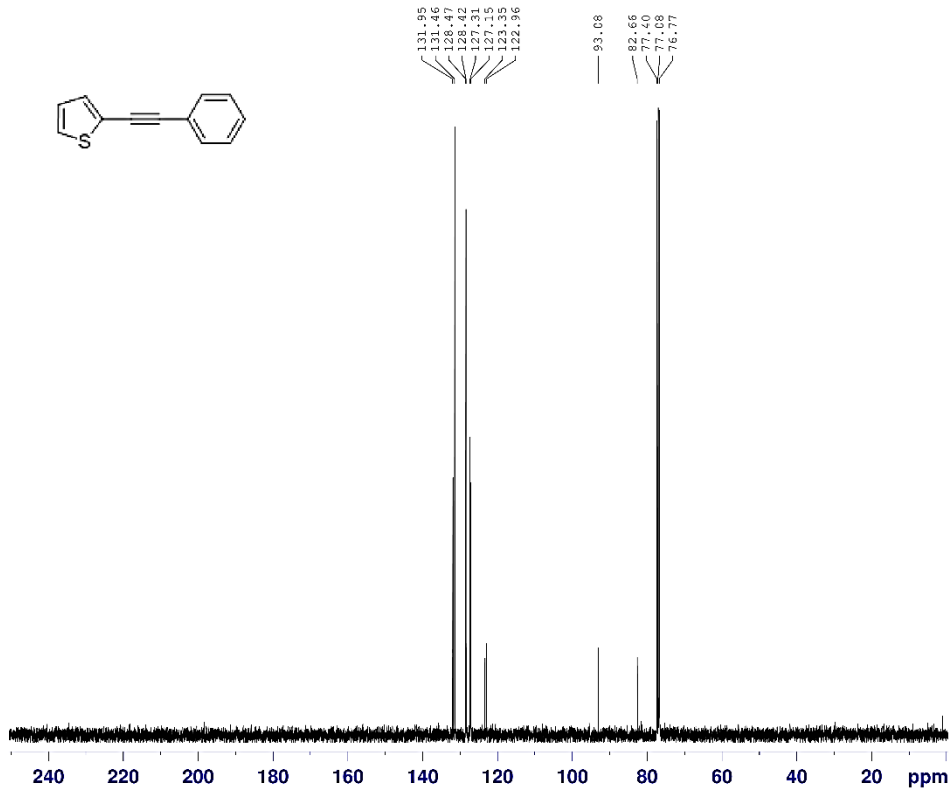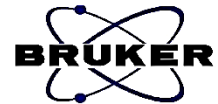

```

NAME Dr.Gholi nejad(hamed)
EXPNO 65
PROCNO 1
Date_ 20150202
Time 12.50
INSTRUM spect
PROBHD 5 mm PABBO BB-
PULPROG zgpg30
TD 65536
SOLVENT CDCl3
NS 110
DS 0
SWE 25252.525 Hz
FIDRES 0.385323 Hz
AQ 1.2976629 sec
RG 2050
DW 19.800 usec
DE 6.50 usec
TE 294.7 K
D1 2.0000000 sec
D11 0.0300000 sec
TD0 1

----- CHANNEL f1 -----
NUC1 13C
P1 9.00 usec
PL1 -0.90 dB
PLLW 42.02801895 W
SFO1 100.6479784 MHz

----- CHANNEL f2 -----
CPDPRG2 waltz16
NUC2 1H
PCPD2 90.00 usec
PL2 -2.00 dB
PL12 14.16 dB
PL13 17.90 dB
PL2W 11.86359406 W
PL12W 0.28722104 W
PL13W 0.12133934 W
SFO2 400.2216009 MHz
SI 32768
SF 100.6353990 MHz
WDW EM
SSB 0
LB 1.00 Hz
GB 0
PC 1.40

```

<sup>13</sup>C NMR of 2-(phenylethynyl)thiophene

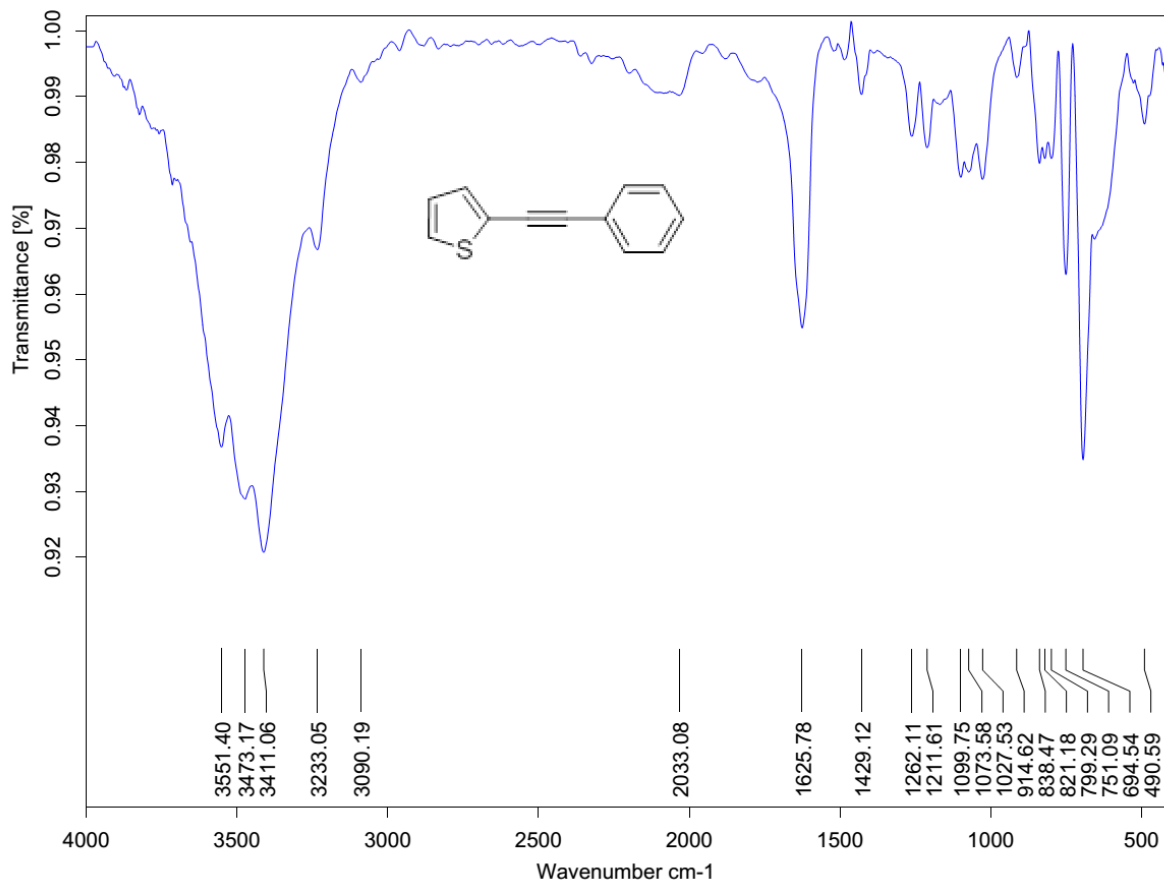

**FT-IR of 2-(phenylethynyl)thiophene**



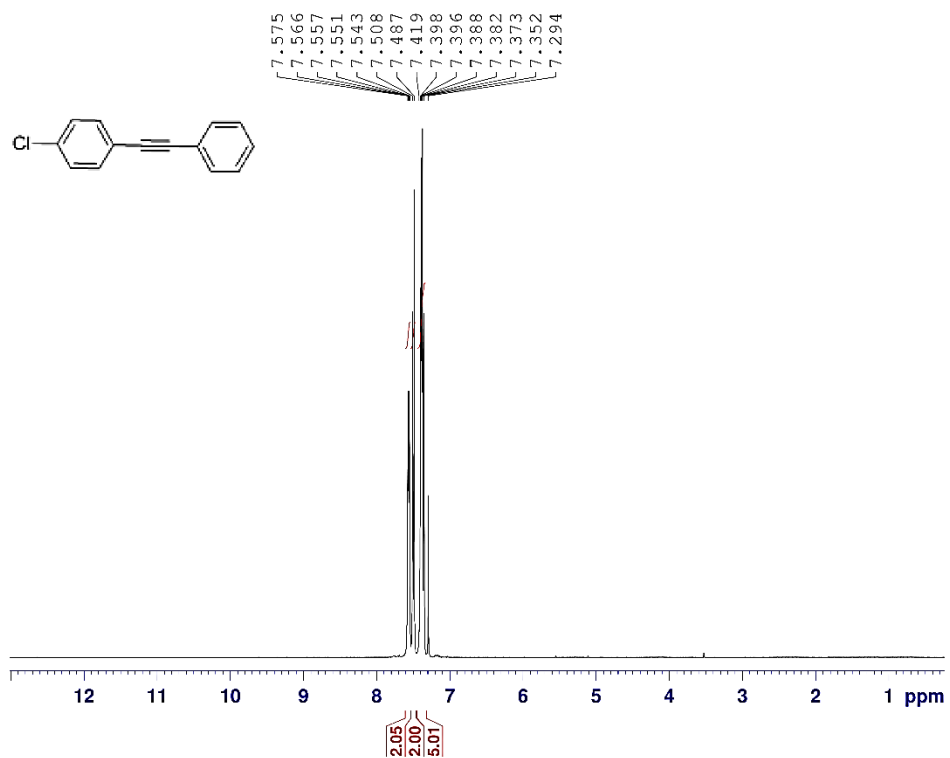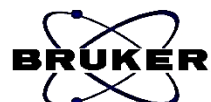

```

NAME      Dr.Gholi nejad (hamed)
EXPNO     1
PROCNO    62
Date_     20150202
Time      12.36
INSTRUM   spect
PROBHD    5 mm PABBO BB-
PULPROG   zg30
TD         65536
SOLVENT   CDCl3
NS         8
DS         0
SWH       8012.820 Hz
FIDRES    0.122266 Hz
AQ         4.0894966 sec
RG         161
DW         62.400 usec
DE         6.50 usec
TE         294.1 K
D1         6.0000000 sec
TDO        1

```

```

----- CHANNEL f1 -----
NUC1      1H
P1         14.00 usec
PL1        -2.00 dB
PT1W      11.86359405 W
SFO1      400.2236020 MHz
SI         32768
SF         400.2200000 MHz
WDW        EM
SSB         0
LB         0.30 Hz
GB         0
PC         1.00

```

<sup>1</sup>H NMR of 1-chloro-4-(phenylethynyl)benzene

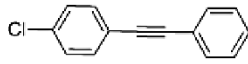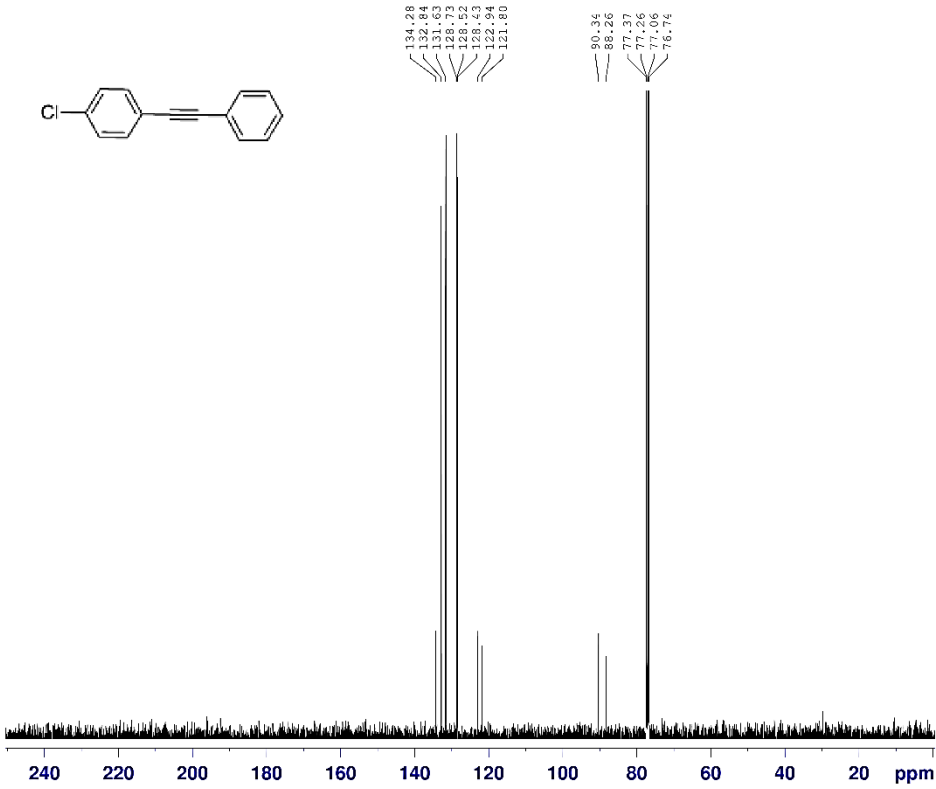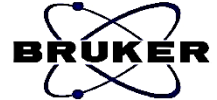

```

NAME          Dr.Gholi nejad (hamed)
EXPNO         63
PROCNO        1
Date_         20150202
Time          12.38
INSTRUM       spect
PROBHD        5 mm PABBO BB-
PULPROG       zgpg30
TD            65536
SOLVENT       cdcl3
NS            100
DS            0
SWH           25252.525 Hz
FIDRES        0.395323 Hz
AQ            1.2976629 sec
RG            2050
DW            19.800 usec
DE            6.50 usec
TE            294.3 K
D1            2.00000000 sec
D11           0.03000000 sec
TD0           1

===== CHANNEL f1 =====
NUC1           13C
P1             9.00 usec
PL1           -0.90 dB
PL1W          42.02801895 W
SFO1          100.6479784 MHz

===== CHANNEL f2 =====
CPDPRG2       waltz16
NUC2           1H
PCPD2         90.00 usec
PL2           2.00 dB
PL12          14.16 dB
PL13          17.90 dB
PL2W          11.86359406 W
PL12W         0.28722104 W
PL13W         0.12139934 W
SFO2          400.2216009 MHz
ST            32768
SF            100.6353990 MHz
WDW           EM
SSB           0
LB            1.00 Hz
GB            0
PC            1.40
  
```

<sup>13</sup>C NMR of 1-chloro-4-(phenylethynyl)benzene

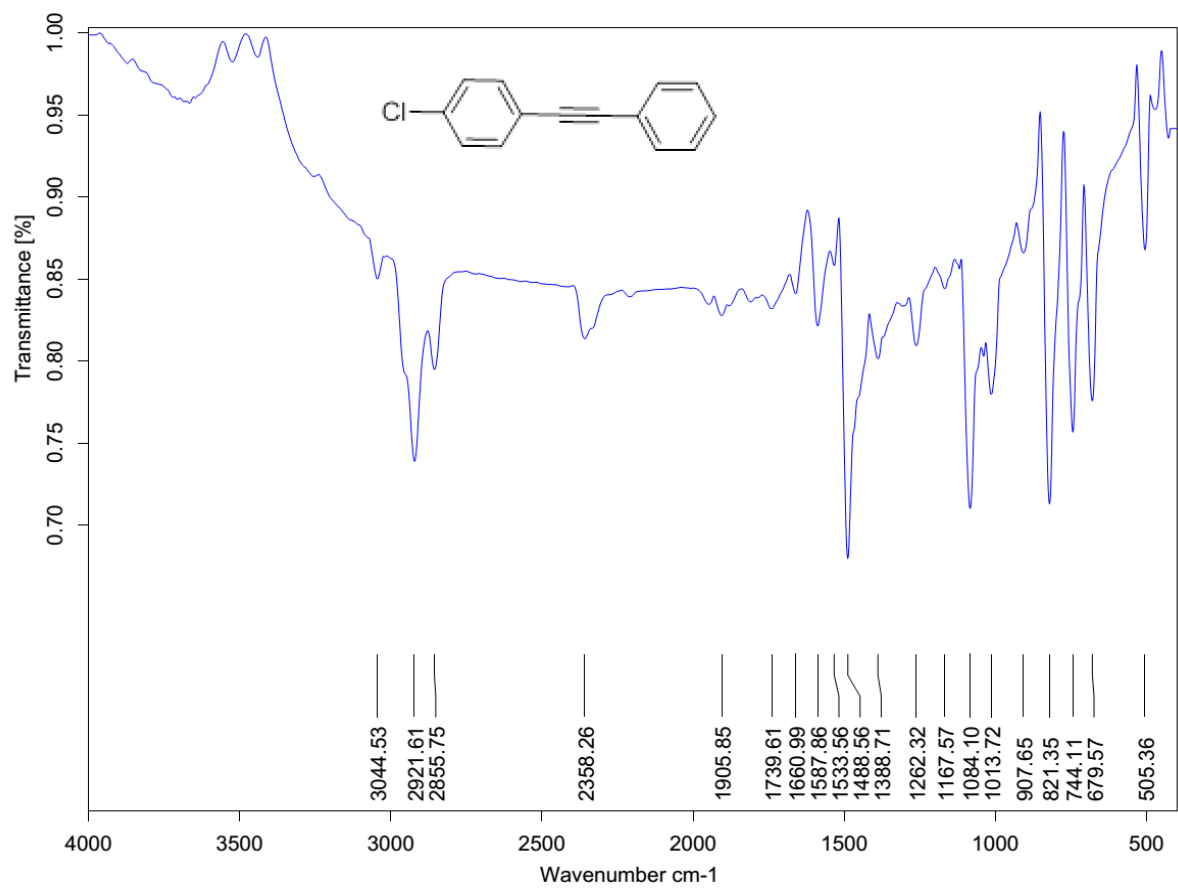

**FT-IR of 1-chloro-4-(phenylethynyl)benzene**

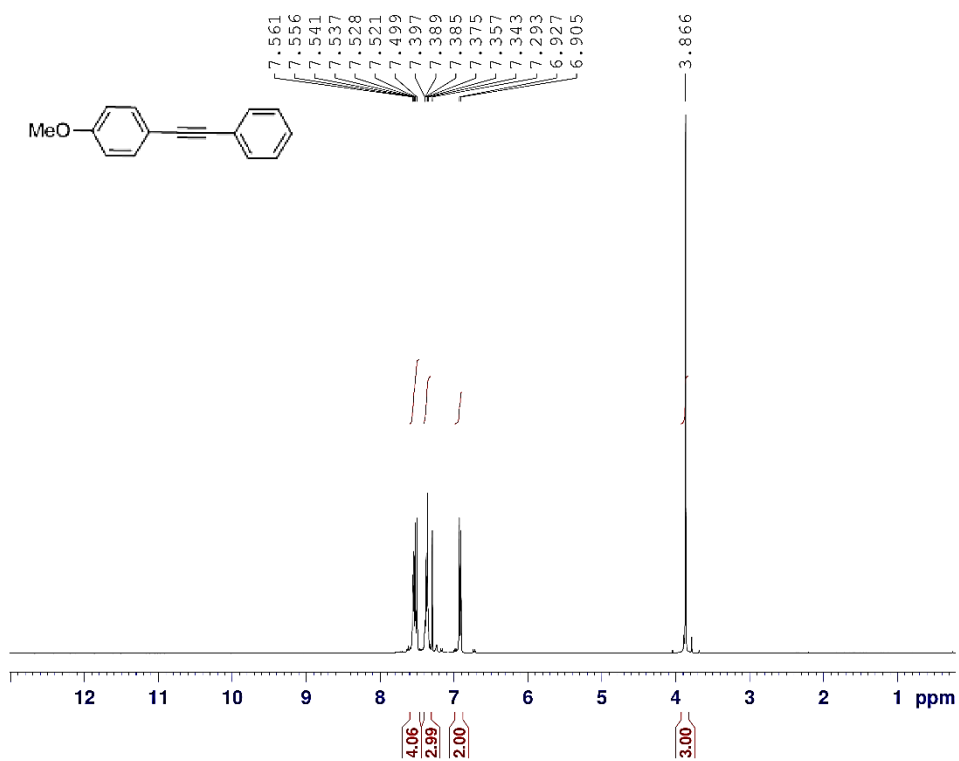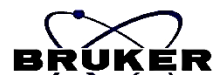

NAME Dr.Gholi nejad (hamed)  
 EXPNO 77  
 PROCNO 1  
 Date\_ 20150225  
 Time 9.52  
 INSTRUM spect  
 PROBEH 5 mm PASSEP B5-  
 PULPROG zg30  
 TD 65536  
 SOLVENT CDCl3  
 NS 12  
 DS 0  
 SWH 8012.820 Hz  
 FIDRES 0.122266 Hz  
 AQ 4.0894966 sec  
 RG 203  
 DW 62.400 usec  
 DE 6.50 usec  
 TE 293.2 K  
 D1 6.0000000 sec  
 TDO 1

===== CHANNEL f1 =====  
 NUC1 1H  
 P1 14.00 usec  
 PL1 -2.00 dB  
 PL1W 11.06359406 W  
 SFO1 400.2236020 MHz  
 SI 32768  
 SF 400.2200000 MHz  
 WDW EM  
 SSB 0  
 LE 0.30 Hz  
 GB 0  
 PC 1.00

<sup>1</sup>H NMR of 1-methoxy-4-(phenylethynyl)benzene

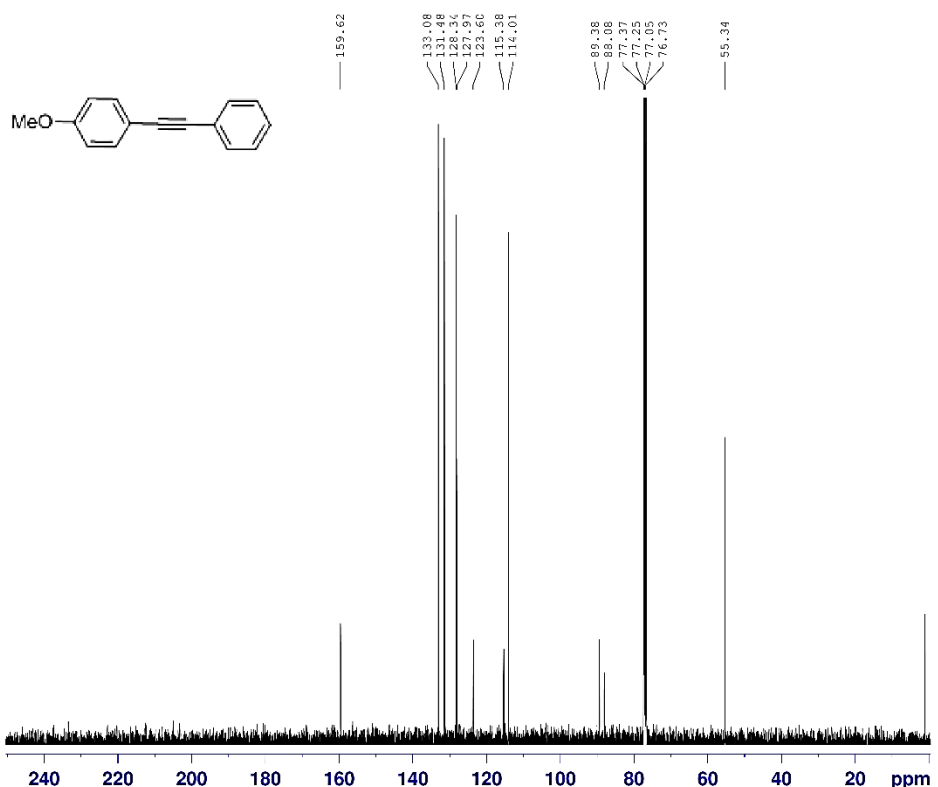

**BRUKER**

NAME Dr.Gholi Rejad (hamed)  
 EXPNO 78  
 PROCNO 1  
 Date\_ 20150225  
 Time\_ 9.57  
 INSTRUM spect  
 PROBNM 5 mm PARBO BB-  
 PULPROG zgpg30  
 TD 65536  
 SOLVENT cdc13  
 NS 420  
 DS 0  
 SWH 25252.525 Hz  
 FIDRES 0.395323 Hz  
 AQ 1.2976629 sec  
 RG 2050  
 DW 19.800 usec  
 DE 6.50 usec  
 TE 293.3 K  
 D1 2.0000000 sec  
 D11 0.0300000 sec  
 TD0 1

===== CHANNEL f1 =====  
 NUC1 13C  
 P1 9.00 usec  
 PL1 -0.90 dB  
 PL1W 42.02801895 W  
 SFO1 100.6479784 MHz

===== CHANNEL f2 =====  
 CPDPRG2 waltz16  
 NUC2 1H  
 PCPD2 90.00 usec  
 PL2 -2.00 dB  
 PL12 14.16 dB  
 PL13 17.90 dB  
 PL2W 11.86359406 W  
 PL12W 0.28722104 W  
 PL13W 0.12139934 W  
 SFO2 400.2216009 MHz  
 SI 32768  
 SF 100.6353990 MHz  
 WDW EU  
 SSB 0  
 LB 1.00 Hz  
 GB 0  
 PC 1.40

<sup>13</sup>C NMR of 1-methoxy-4-(phenylethynyl)benzene

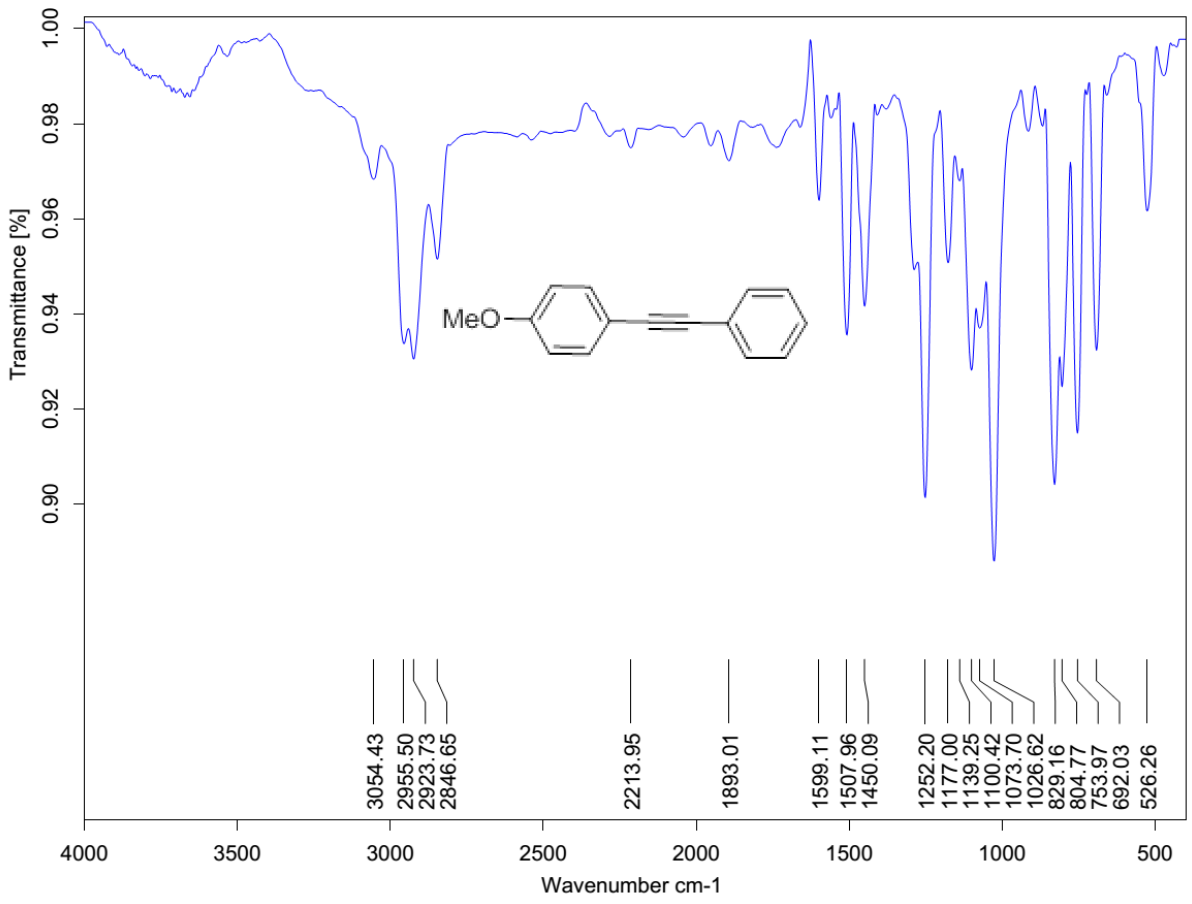

**FT-IR of 1-methoxy-4-(phenylethynyl)benzene**

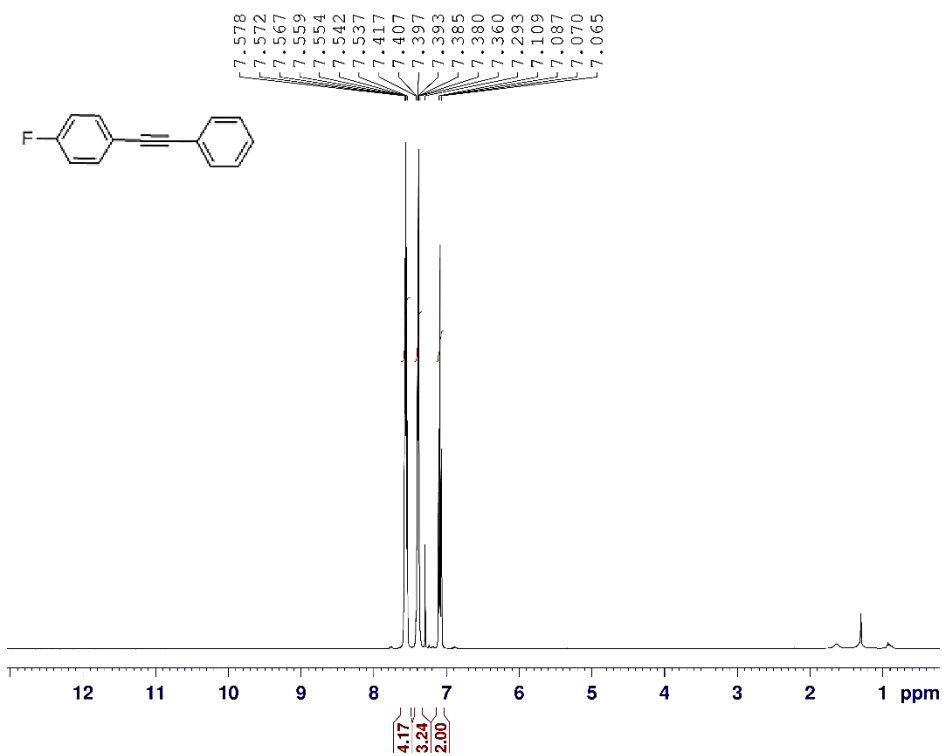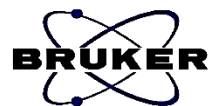

```

NAME      Dr.Chohli nejad(hamed)
EXPNO     70
PROCNO    1
Date_     20150214
Time      12.28
INSTRUM   spect
PROBHD    5 mm PABBO BB-
PULPROG   zg30
TD         65536
SOLVENT   CDCl3
NS         12
DS         0
SWH       8012.820 Hz
FIDRES    0.122266 Hz
AQ         4.0894966 sec
RG         161
DW         62.400 usec
DE         6.50 usec
TE         293.5 K
D1         6.0000000 sec
TD0        1
  
```

```

===== CHANNEL f1 =====
NUC1      1H
P1        14.00 usec
PL1       -2.00 dB
PL1W      11.86359406 W
SFO1      400.2236020 MHz
SI         32768
SF         400.2200000 MHz
WDW        EM
SSB        0
LB         0.30 Hz
GB         0
PC         1.00
  
```

<sup>1</sup>H NMR of 1-fluoro-4-(phenylethynyl)benzene

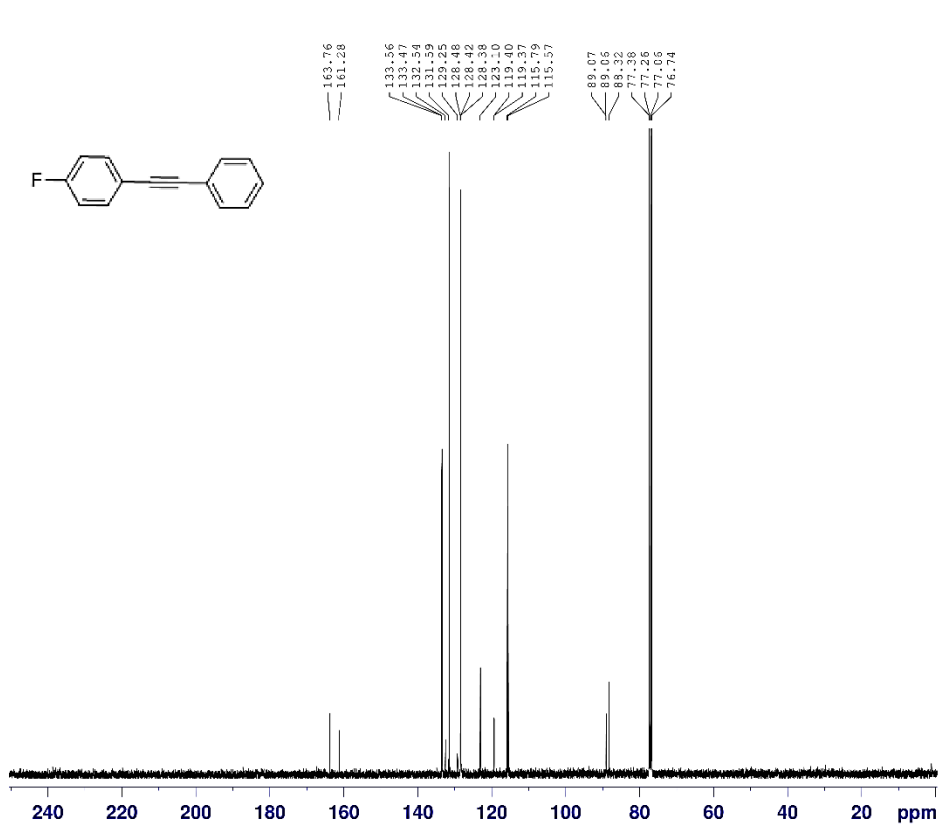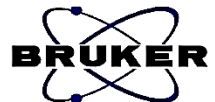

```

NAME      Dr.Gholi nejad (hamed)
EXPNO    71
PROCNO   1
Date_    20150214
Time     12.33
INSTRUM  spect
PROBHD   5 mm PABBO BB-
PULPROG  zgpg30
TD       65536
SOLVENT  CDCl3
NS       421
DS       0
SWH      25252.525 Hz
FIDRES   0.385323 Hz
AQ       1.2976629 sec
RG       2050
DW       19.800 usec
DE       6.50 usec
TR       293.8 K
D1       2.0000000 sec
D11      0.0300000 sec
TD0      1

----- CHANNEL f1 -----
NUC1     13C
P1       9.00 usec
PL1     -0.30 dB
PL1W    42.02801825 W
SFO1    100.6479784 MHz

----- CHANNEL f2 -----
CPDPRG2  waltz16
NUC2     1H
PCPD2   90.00 usec
PL2     -2.00 dB
PL12    14.16 dB
PL13    17.90 dB
PL2W    11.86359406 W
PL12W   0.28722104 W
PL13W   0.12139934 W
SFO2    400.2216009 MHz
SI       32768
SF      100.6353990 MHz
WDW      EM
SSB      0
LB       1.00 Hz
GB       0
PC       1.40

```

<sup>13</sup>C NMR of 1-fluoro-4-(phenylethynyl)benzene



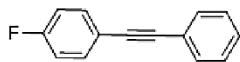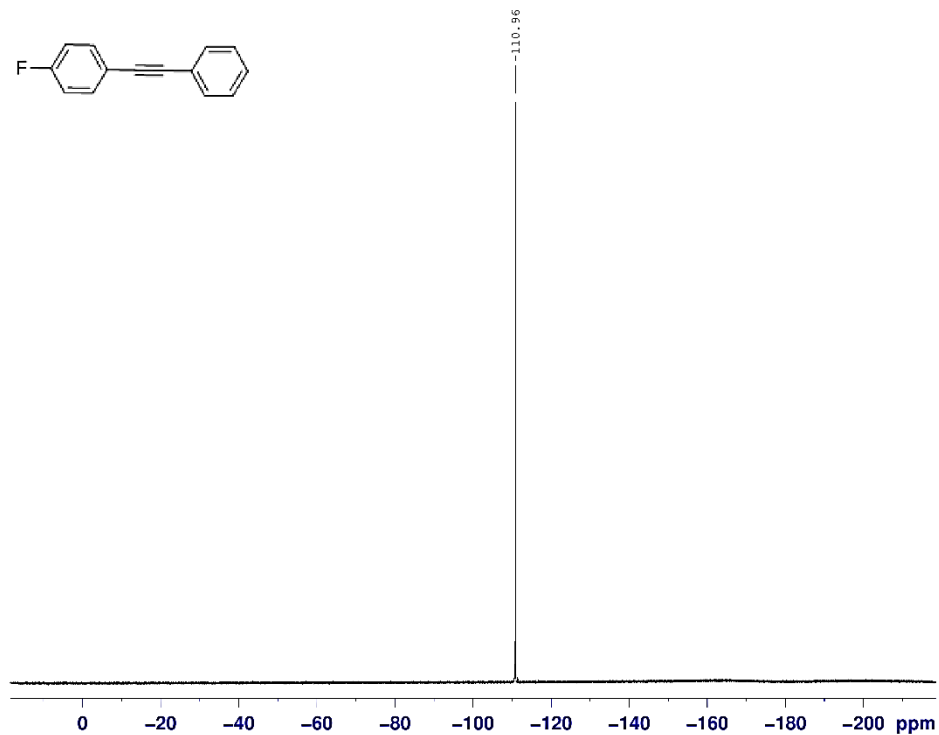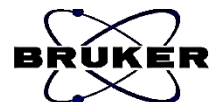

```

NAME: br.Gho11 ne3ed (named)
EXPNO 111
PROCNO 1
Date_ 20150408
Time 15.55
INSTRUM spect
PROBHD 5 mm PABBO BB-
PULPROG zgpg30
TD 131072
SOLVENT CDC13
NS 16
DS 0
SWH 89285.711 Hz
FIDRES 0.681196 Hz
AQ 0.7340532 sec
RG 2050
DW 5.600 usec
DE 6.50 usec
TE 295.1 K
D1 1.00000000 sec
D11 0.03000000 sec
D12 0.00002000 sec
TD0 1

```

```

===== CHANNEL f1 =====
NUC1 19F
P1 14.00 usec
PL1 -2.40 dB
PL1R 14.31771946 W
SFO1 376.5453925 MHz

```

```

===== CHANNEL f2 =====
CFDPRG2 waltz16
NUC2 1H
PCPD2 90.00 usec
PL2 -2.00 dB
PL12 14.48 dB
PL2R 11.86359406 W
PL12R 0.26681873 W
SFO2 400.2216009 MHz
S1 65536
SF 376.5830510 MHz
WDW EM
SSB 0
LB 0.30 Hz
GB 0
PC 1.00

```

<sup>19</sup>F NMR of 1-fluoro-4-(phenylethynyl)benzene

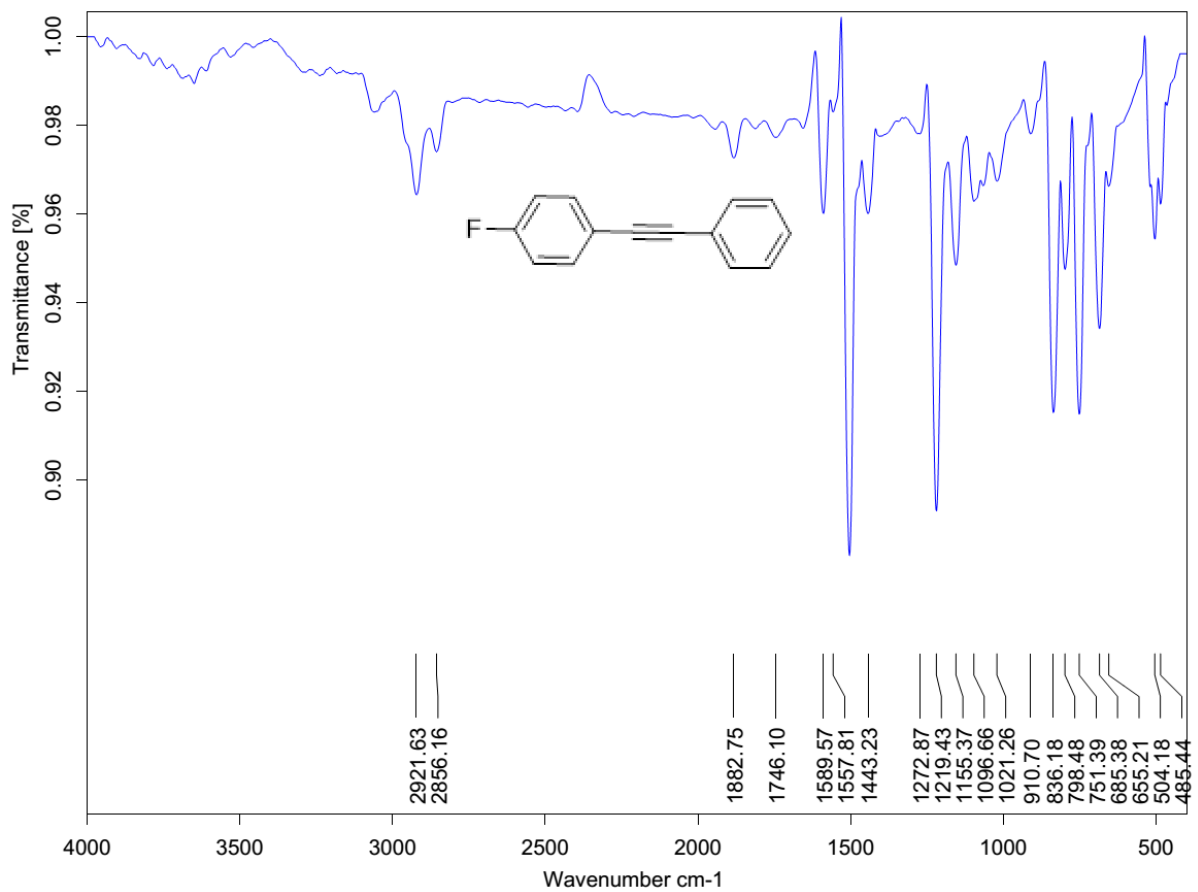

**FT-IR of 1-fluoro-4-(phenylethynyl)benzene**

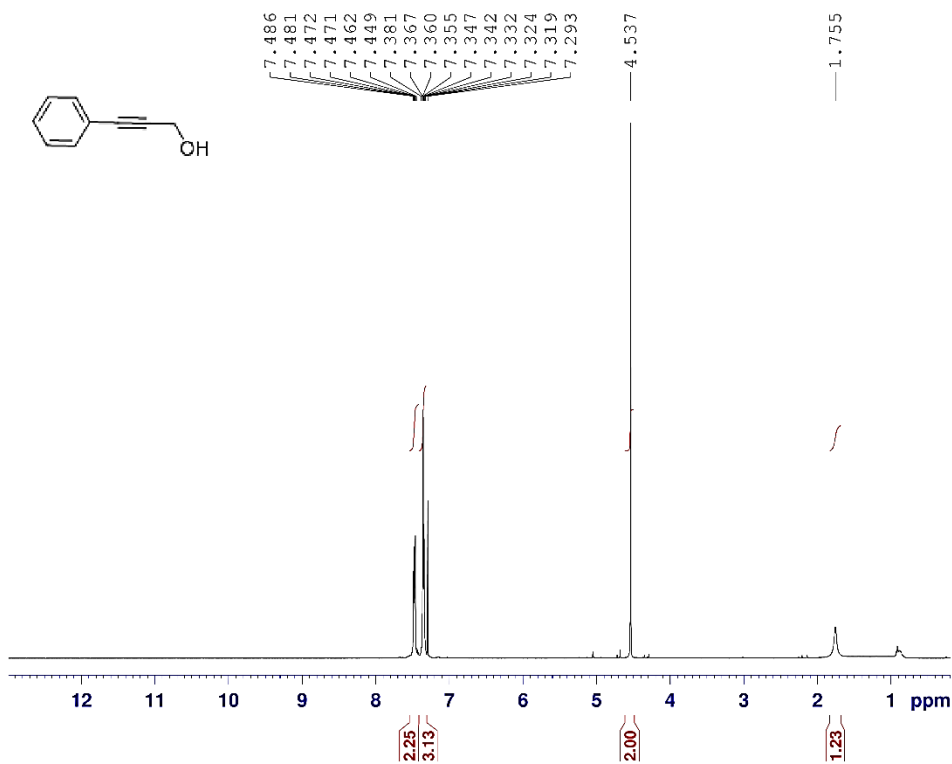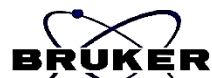

NAME Dr.Gholi nejad(hamed)  
 EXPNO 84  
 PROCNO 1  
 Date\_ 20150304  
 Time 13.12  
 INSTRUM spect  
 PROBHD 5 mm PABBO BB-  
 PULPROG zg30  
 TD 65536  
 SOLVENT CDCl3  
 NS 12  
 DS 0  
 SWH 8012.820 Hz  
 FIDRES 0.122266 Hz  
 AQ 4.0894966 sec  
 RG 256  
 DW 62.400 usec  
 DE 6.50 usec  
 TE 294.0 K  
 D1 6.00000000 sec  
 TDO 1

----- CHANNEL f1 -----  
 NUC1 1H  
 P1 14.00 usec  
 PL1 -2.00 dB  
 PL1W 11.86359406 W  
 SFO1 400.2236020 MHz  
 SI 32768  
 SF 400.2200000 MHz  
 WDW EM  
 SSB 0  
 LB 0.30 Hz  
 GB 0  
 PC 1.00

<sup>1</sup>H NMR of 3-phenylprop-2-yn-1-ol

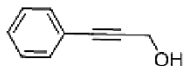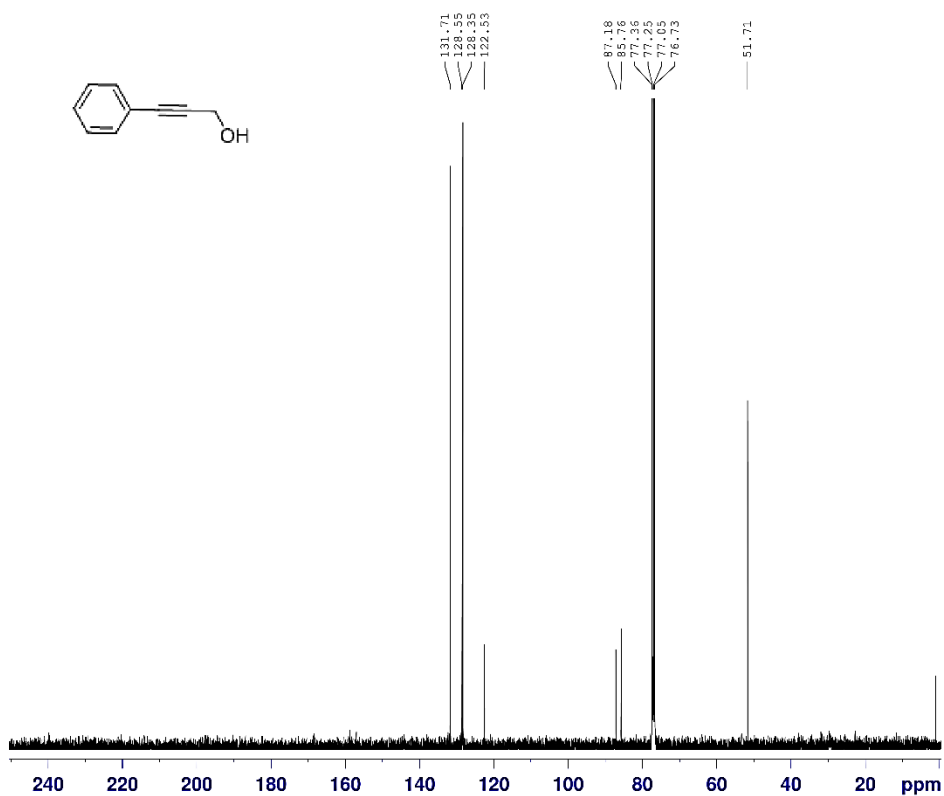

<sup>13</sup>C NMR of 3-phenylprop-2-yn-1-ol

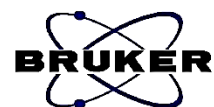

```

NAME      Dr.Cholli nejad (hamed)
EXPNO     85
PROCNO    1
Date_     20150304
Time      13.14
INSTRUM   spect
PROBHD    5 mm PABBO WB-
PULPROG   zgpg30
TD         65536
SOLVENT   CDCl3
NS         1001
DS         0
SWH        25252.525 Hz
FIDRES     0.385323 Hz
AQ         1.2976629 sec
RG         2050
DM         19.800 usec
DE         6.50 usec
TE         294.1 K
D1         2.00000000 sec
D11        0.03000000 sec
TD0        1

===== CHANNEL f1 =====
NUC1       13C
P1         9.00 usec
PL1        -0.90 dB
PL1W       42.02801895 W
SFO1       100.6479784 MHz

===== CHANNEL f2 =====
CPDPRG2   waltz16
NUC2       1H
PCPD2     90.00 usec
PL2        -2.00 dB
PL12       14.16 dB
PL13       17.90 dB
PL2W       11.86359406 W
PL12W      0.28722104 W
PL13W      0.12139934 W
SFO2       400.2216009 MHz
SI         32768
SF         100.6353990 MHz
WDW        EM
SSB        0
LB         1.00 Hz
GB         0
PC         1.40
  
```

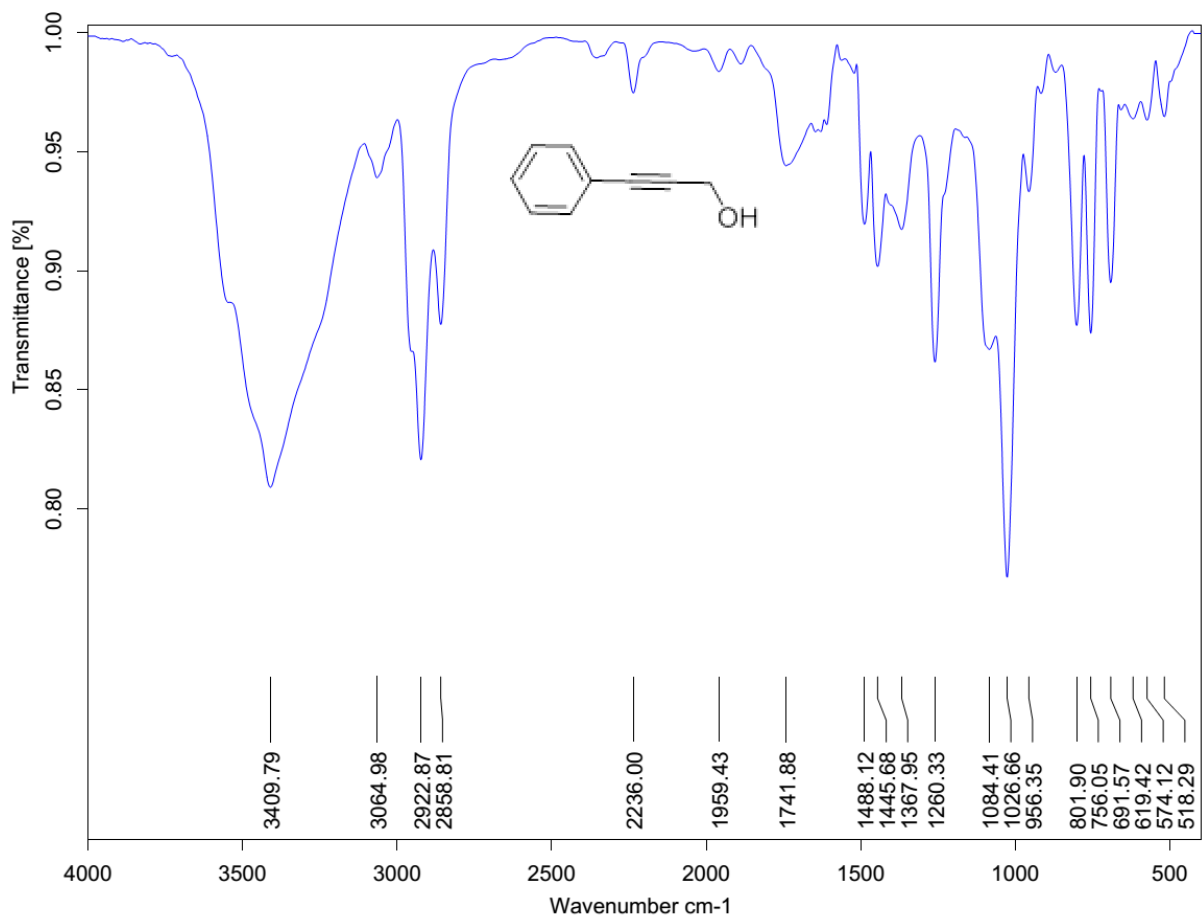

**FT-IR of 3-phenylprop-2-yn-1-ol**

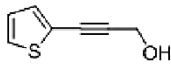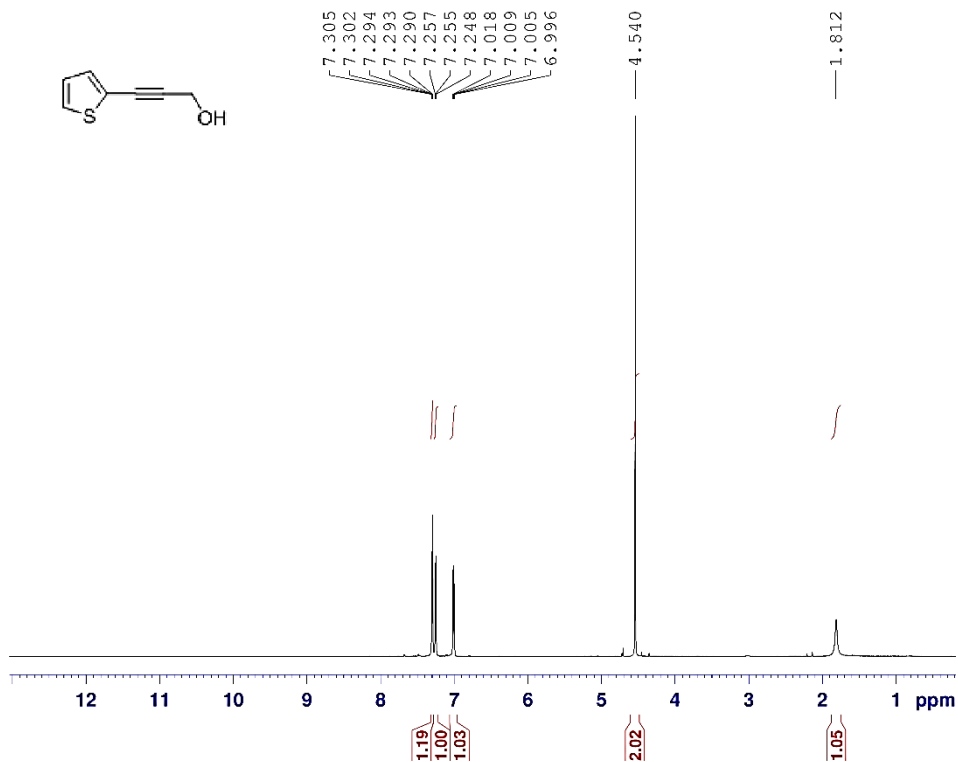

**BRUKER**

Dr. Ghohli nejad (hamed)

NAME  
EXPNO 98  
PROCNO 1  
Date\_ 20150311  
Time 10.14  
INSTRUM spect  
PROBHD 5 mm PABBO BB-  
PULPROG zg30  
TD 65536  
SOLVENT CDCl3  
NS 9  
DS 0  
SWH 8012.820 Hz  
FIDRES 0.122266 Hz  
AQ 4.0894966 sec  
RG 203  
DW 62.400 usec  
DE 6.50 usec  
TE 294.4 K  
D1 6.00000000 sec  
TD0 1

----- CHANNEL f1 -----  
NUC1 1H  
P1 14.00 usec  
PL1 -2.00 dB  
PLLW 11.86359406 W  
SF01 400.2236020 MHz  
SI 32768  
SF 400.2200000 MHz  
WDW EM  
SSE 0  
LB 0.30 Hz  
GB 0  
PC 1.00

<sup>1</sup>H NMR of 3-(thiophen-2-yl)prop-2-yn-1-ol

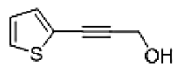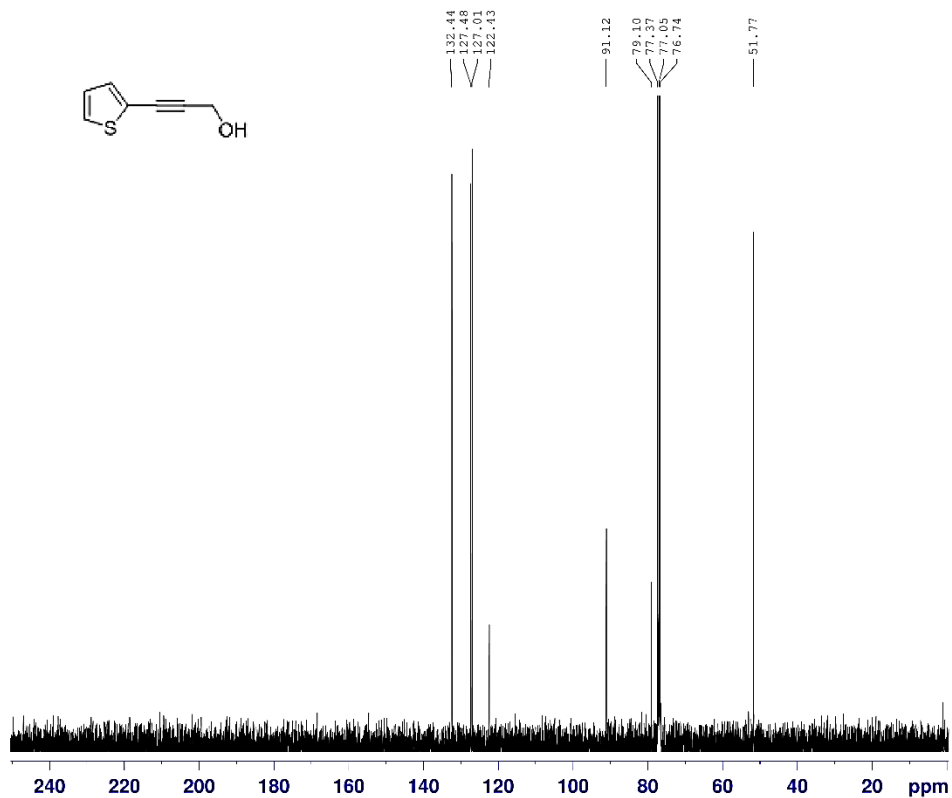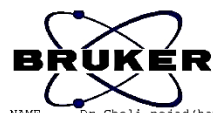

```

NAME          Dr.Gholi nejad(hamed)
EXPNO         39
PROCNO        1
Date_         20150311
Time          10.21
INSTRUM       spect
PROBHD        5 mm PABBO BB-
PULPROG       zgpg30
TD            65536
SOLVENT       CDCl3
NS            160
DS            0
SWH           25252.525 Hz
FIDRES        0.385323 Hz
AQ            1.2976629 sec
RG            2050
DW            19.800 usec
DE            6.50 usec
TE            294.6 K
D1            2.0000000 sec
D11           0.0300000 sec
TD0           1

===== CHANNEL f1 =====
NUC1          13C
P1            9.00 usec
PL1           -0.90 dB
P11W         42.02801895 W
SFO1         100.6479784 MHz

===== CHANNEL f2 =====
CPDPRG2       waltz16
NUC2          1H
PCPD2        90.00 usec
PL2           -2.00 dB
PL12         14.16 dB
PL13         17.90 dB
PL2W         11.86359406 W
P112W        0.28722104 W
P113W        0.12139934 W
SFO2         400.2216009 MHz
SI            32768
SF           100.6353990 MHz
WDW           EM
SSB           0
LB            1.00 Hz
GB            0
PC            1.40
  
```

<sup>13</sup>C NMR of 3-(thiophen-2-yl)prop-2-yn-1-ol

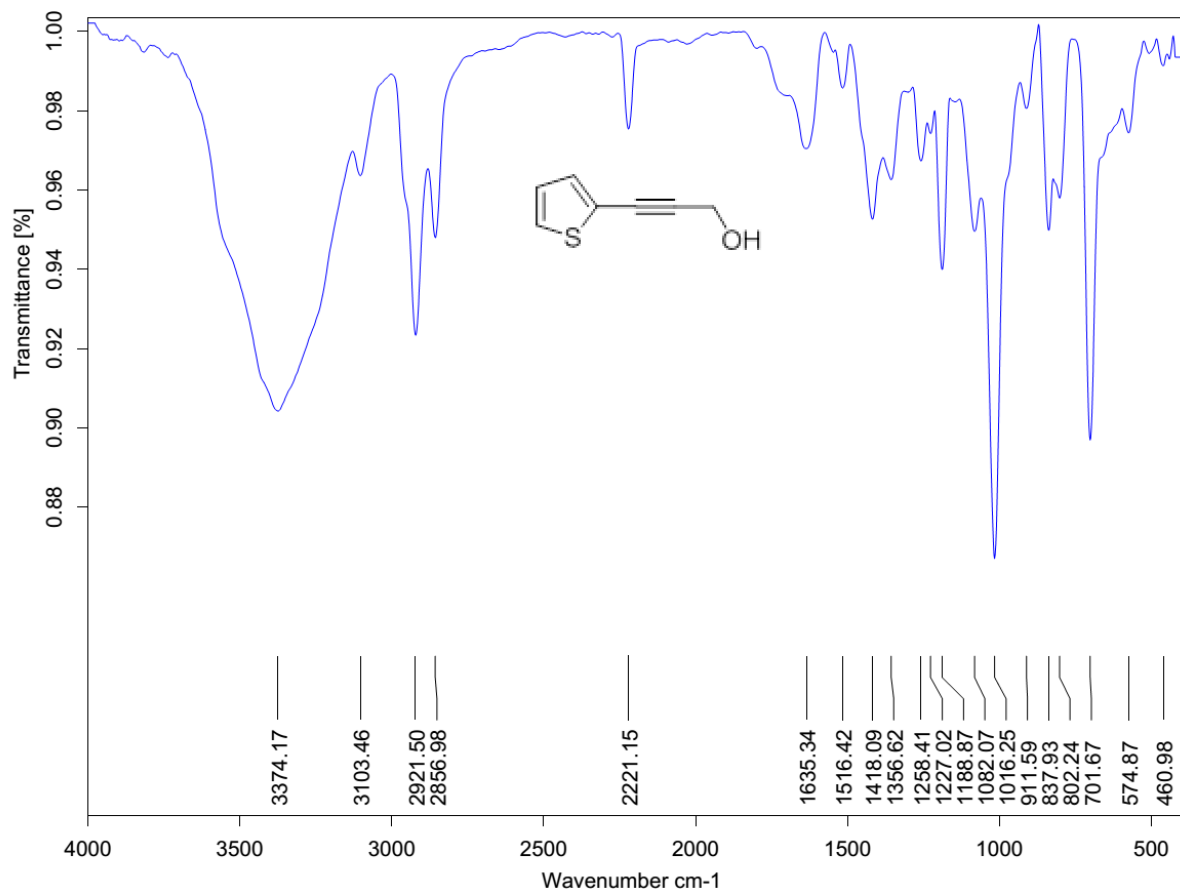

**FT-IR of 3-(thiophen-2-yl)prop-2-yn-1-ol**



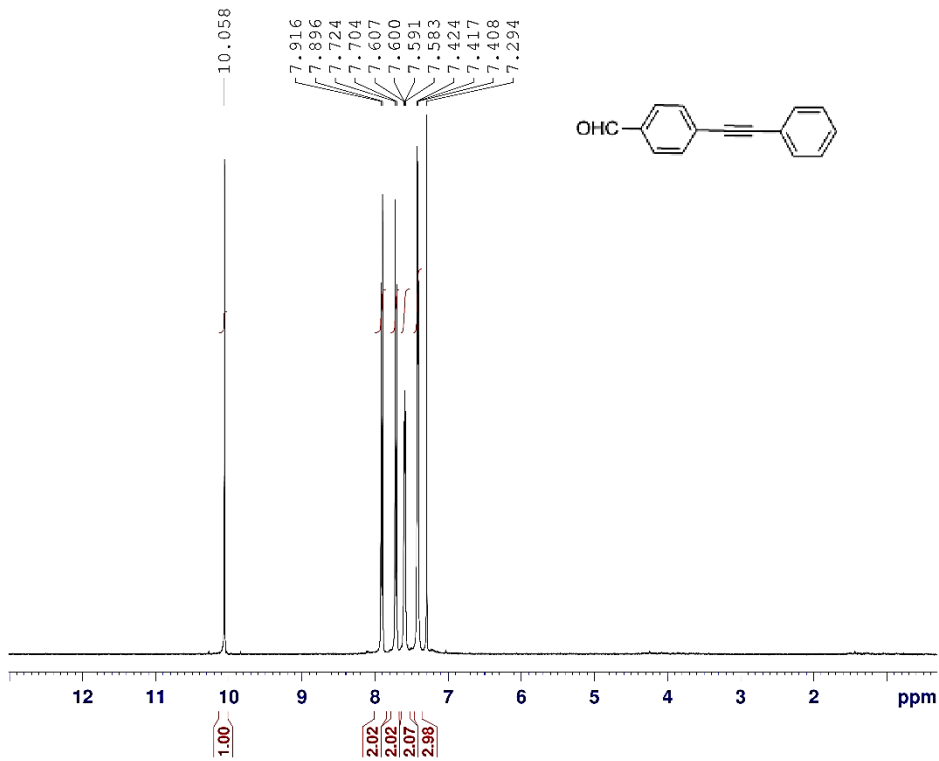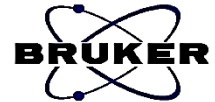

```

NAME      Dr.Gholi nejad (hamed)
EXPNO     1
PROCNO    1
Date_     20150214
Time      13.00
INSTRUM   spect
PROBHD    5 mm PABBO B3-
PULPROG   zg30
TD         65536
SOLVENT   CDCl3
NS         12
DS         0
SWH       8012.820 Hz
FIDRBS    0.122266 Hz
AQ         4.0894966 sec
RG         256
DW         62.400 usec
DE         6.50 usec
TE         293.5 K
D1         6.0000000 sec
TD0        1

===== CHANNEL f1 =====
NUC1       1H
P1         14.00 usec
PL1        -2.00 dB
PL1W       11.86359406 W
SFO1       400.2236020 MHz
SI         32768
SF         400.2200000 MHz
WDW        EM
SSB        0
LB         0.30 Hz
GB         0
PC         1.00

```

<sup>1</sup>H NMR of 4-(phenylethynyl)benzaldehyde

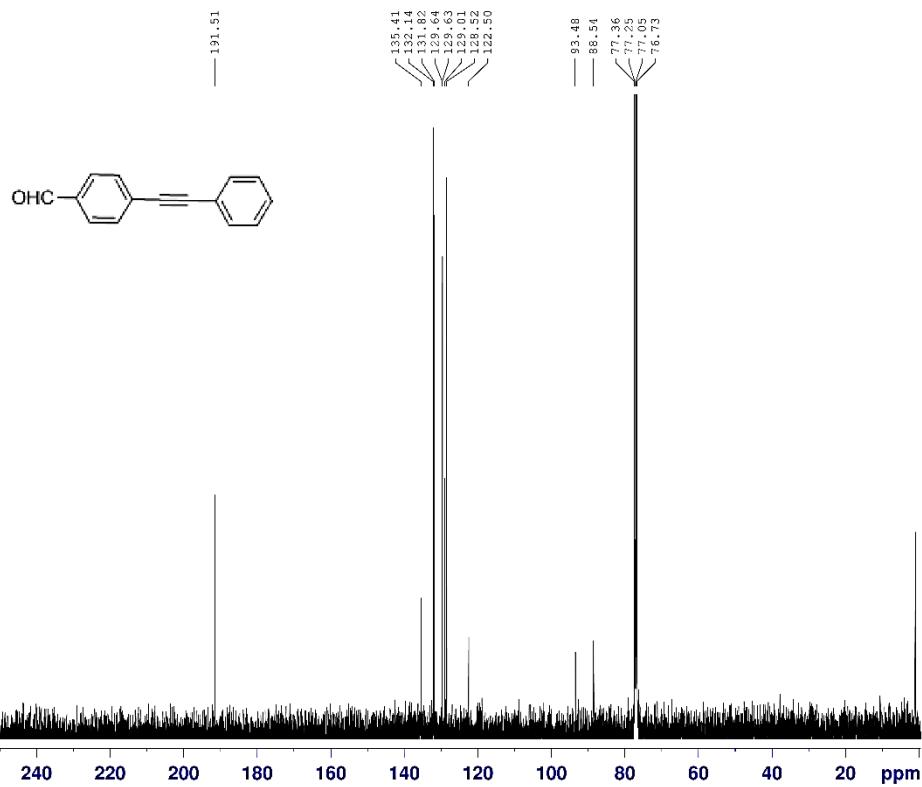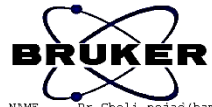

```

NAME      Dr.Gholi nejad (hamed)
EXPNO     72
PROCNO    1
Date_     20150214
Time      13.02
INSTRUM   spect
PROBHD    5 mm PABBO B8-
PULPROG   zgpg30
TD         65536
SOLVENT   CDCl3
NS         500
DS         0
SWH        25252.525 Hz
FIDRES     0.385323 Hz
AQ         1.2976629 sec
RG         2050
DW         19.800 usec
DE         6.50 usec
TE         293.6 K
D1         2.0000000 sec
D11        0.0300000 sec
TD0        1

===== CHANNEL f1 =====
NUC1       13C
P1         9.00 usec
PL1        -0.90 dB
PL1W       42.02801895 W
SF01       100.6479784 MHz

===== CHANNEL f2 =====
CPDPRG2   waltz16
NUC2       1H
PCPD2     90.00 usec
PL2        -2.00 dB
PL12       14.16 dB
PL13       17.90 dB
PL2W       11.86359406 W
PL12W      0.28722104 W
PL13W      0.12139934 W
SFO2       400.2216009 MHz
ST         32768
SF         100.6353990 MHz
WDW        EM
SSB        0
LB         1.00 Hz
GB         0
PC         1.40

```

<sup>13</sup>C NMR of 4-(phenylethynyl)benzaldehyde

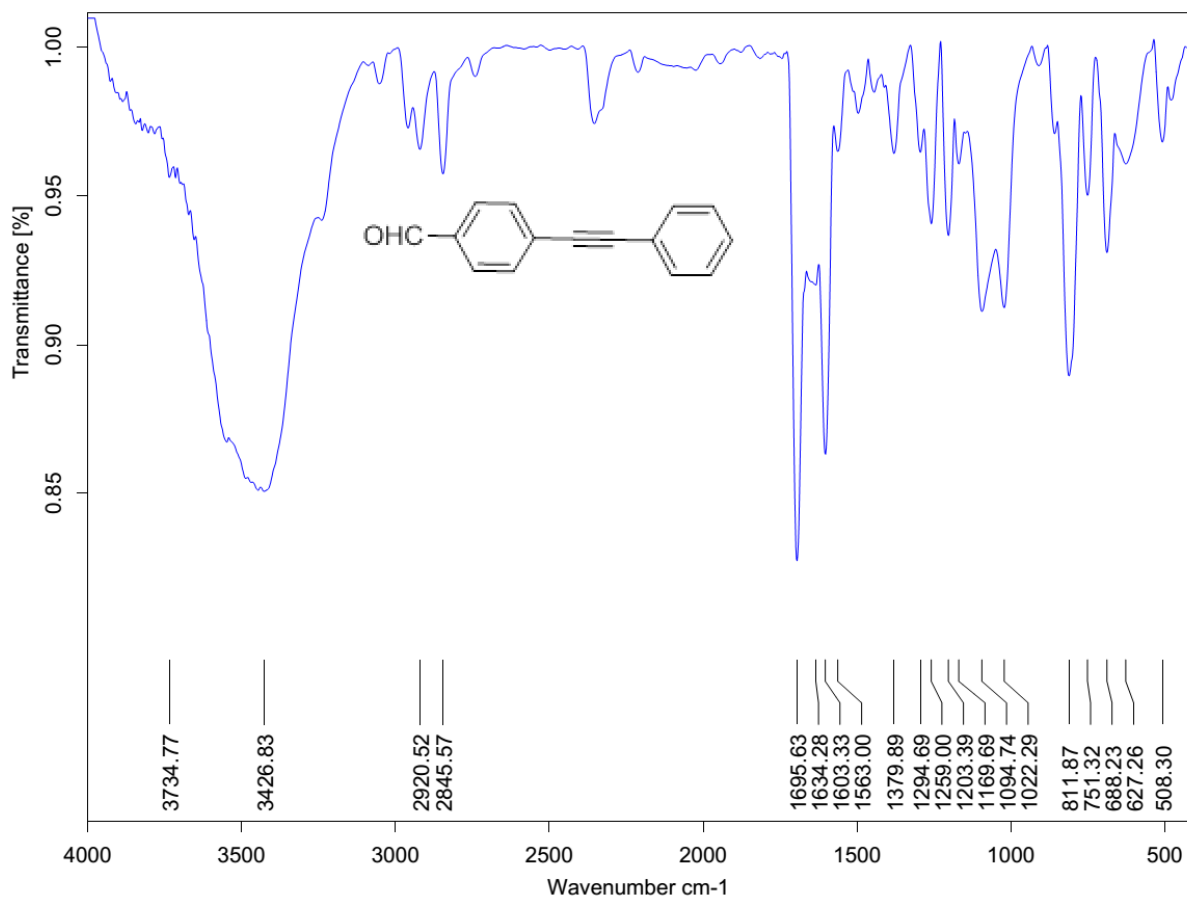

**FT-IR of 4-(phenylethynyl)benzaldehyde**

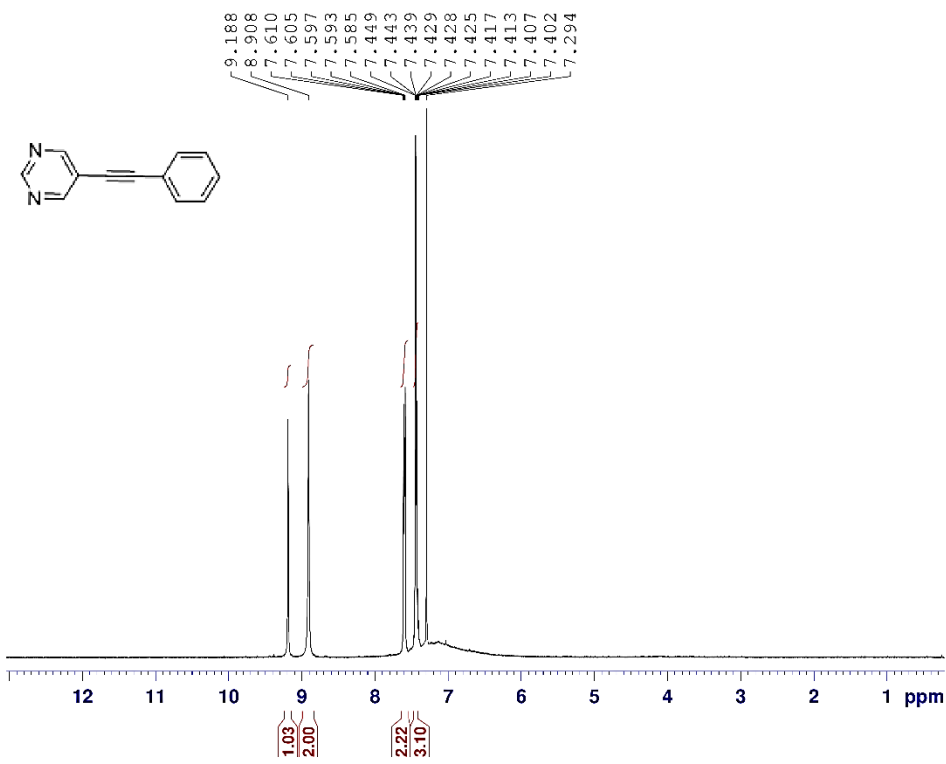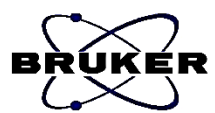

```

NAME      Dr.Gholi nejad (hamed)
EXPNO    1
PROCNO   1
Date_    20150214
Time     11.37
INSTRUM  spect
PROBHD   5 mm PABBO BBI-
PULPROG  zg30
TD        65536
SOLVENT  CDCl3
NS        12
DS        0
SWH       8012.820 Hz
FIDRES    0.122266 Hz
AQ        4.0894966 sec
RG         287
DW        62.400 usec
DE        6.50 usec
TE        293.9 K
D1        6.00000000 sec
TD0       1

----- CHANNEL f1 -----
NUC1      1H
P1        14.00 usec
PL1       -2.00 dB
PL1W      11.86359406 W
SFO1      400.2216020 MHz
SI         32768
SF         400.2200000 MHz
WDW        FM
SSB        0
LB         0.30 Hz
GB         0
PC         1.00

```

<sup>1</sup>H NMR of 5-(phenylethynyl)pyrimidine

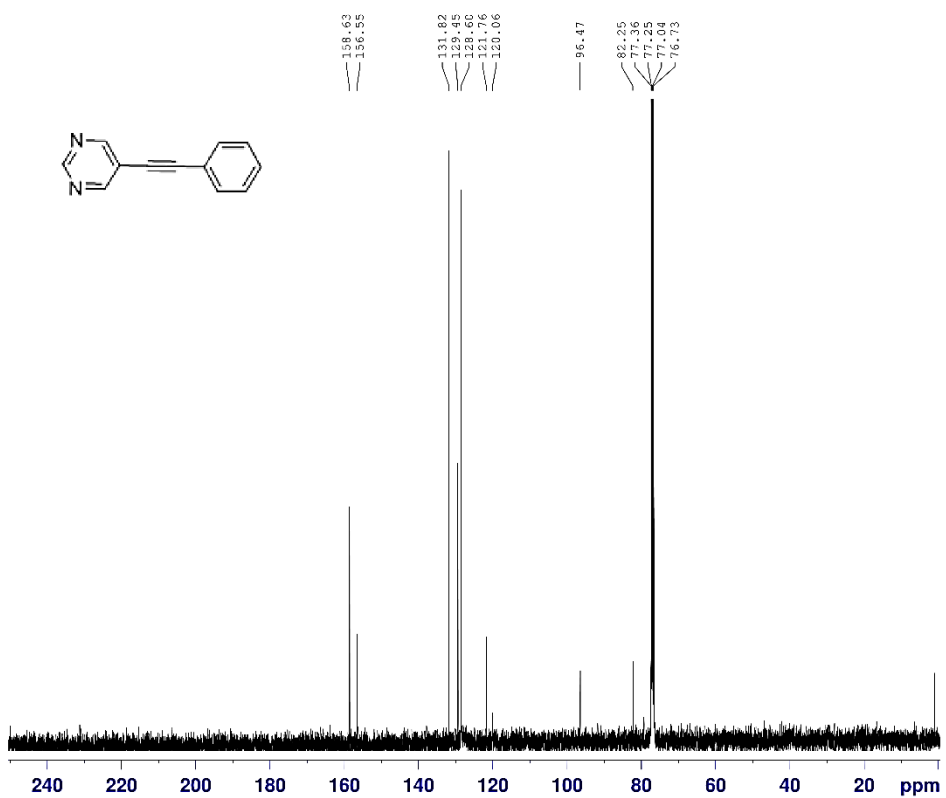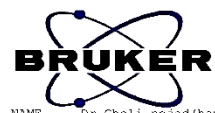

```

NAME      Dr.Gholi nejad(hamed)
EXPNO     73
PROCNO    1
Date_     20150214
Time      13.33
INSTRUM   spect
PROBHD    5 mm DABBO BB-
PULPROG   zgpg30
TD         65536
SOLVENT   CDCl3
NS         1721
DS         0
SWH        25252.525 Hz
FIDRES     0.385323 Hz
AQ         1.2976229 sec
RG         2050
DW         19.800 usec
DE         6.50 usec
TE         293.6 K
D1         2.00000000 sec
D11        0.03000000 sec
TDO        1

```

```

===== CHANNEL f1 =====
NUC1      13C
P1        9.00 usec
PL1       -0.90 dB
PL1W      42.02801895 W
SFO1      100.6479784 MHz

```

```

===== CHANNEL f2 =====
CPDPRG2   waltz16
NUC2      1H
PCPD2     90.00 usec
PL2       -2.00 dB
PL12      14.16 dB
PL13      17.90 dB
PL12W     11.86359406 W
PL12W     0.28722104 W
PL13W     0.12139934 W
SFO2      400.2216009 MHz
SI         32768
SF        100.6353990 MHz
WDW        EM
SSB        0
LB         1.00 Hz
GB         0
PC         1.40

```

<sup>13</sup>C NMR of 5-(phenylethynyl)pyrimidine

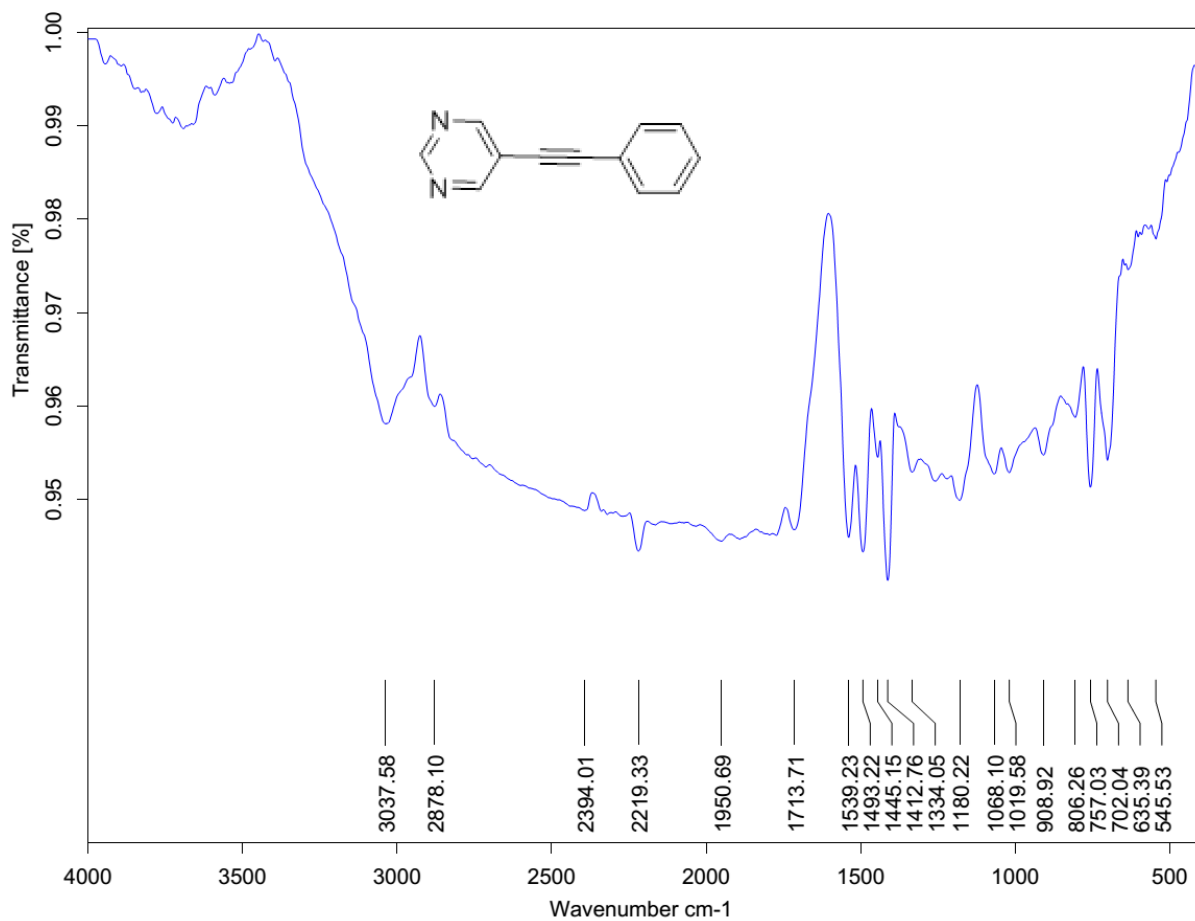

**FT-IR of 5-(phenylethynyl)pyrimidine**

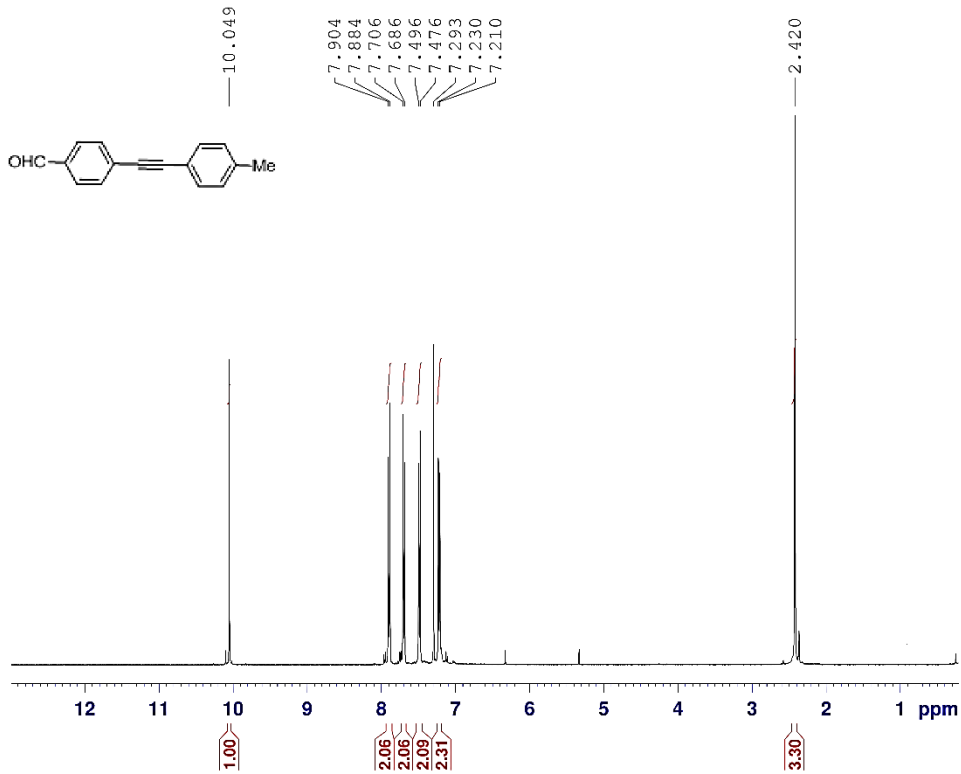

**BRUKER**

NAME Dr.Gholi nejad(hamed)  
 EXPNO 104  
 PROCNO 1  
 Date\_ 20150311  
 Time 11.17  
 INSTRUM spect  
 PROBHD 5 mm PABBO BB-  
 PULPROG zg30  
 TD 65536  
 SOLVENT CDCl3  
 NS 7  
 DS 0  
 SWH 8012.820 Hz  
 FIDRES 0.122266 Hz  
 AQ 4.0894966 sec  
 RG 287  
 DW 62.400 usec  
 DE 6.50 usec  
 TE 294.4 K  
 D1 6.00000000 sec  
 TDO 1

----- CHANNEL f1 -----  
 NUC1 1H  
 P1 14.00 usec  
 PLL -2.00 dB  
 PLLW 11.86359406 W  
 SFO1 400.2236020 MHz  
 SI 32768  
 SF 400.2200000 MHz  
 WDW EM  
 SSB 0  
 LB 0.30 Hz  
 GB 0  
 PC 1.00

<sup>1</sup>H NMR of 4-(p-tolyethynyl)benzaldehyde

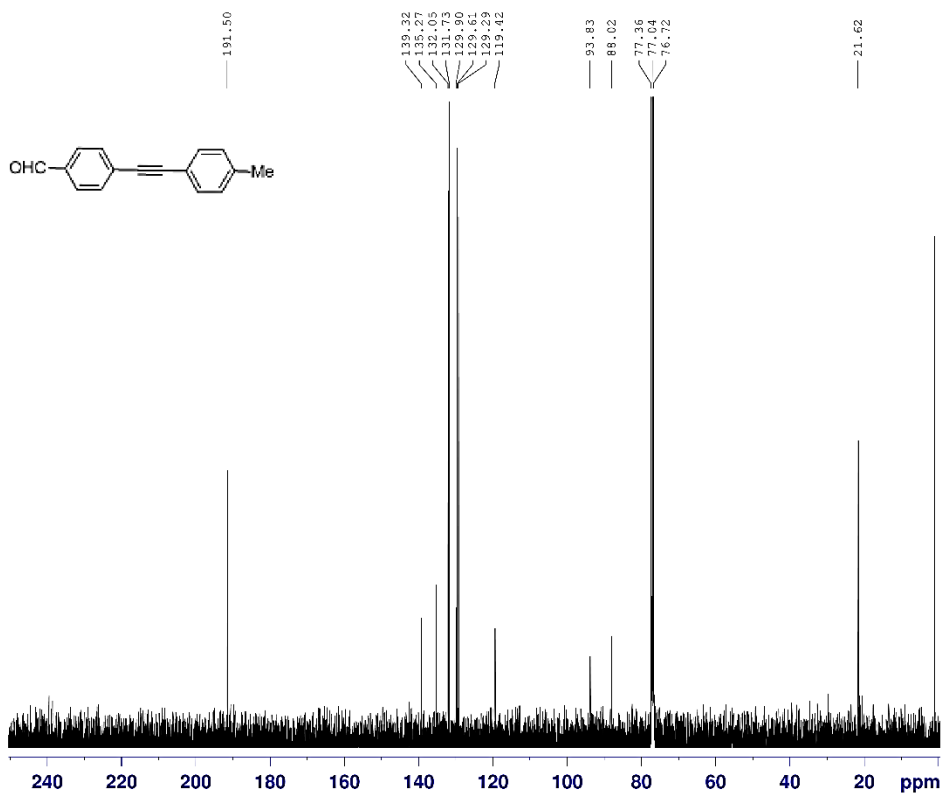

**BRUKER**

```

NAME      Dr.Gholi nejad (hamed)
EXPNO     1
PROCNO    1
Date_     20150311
Time      11.19
INSTRUM   spect
PROBHD    5 mm PABBO BB-
PULPROG   zgpg30
ID         65536
SOLVENT   CDCl3
NS         260
DS         0
SWH        25252.525 Hz
FIDRES     0.385323 Hz
AQ         1.2976629 sec
RG         2050
DM         19.800 usec
DE         6.50 usec
TE         294.7 K
D1         2.00000000 sec
D11        0.03000000 sec
TD0        1

===== CHANNEL f1 =====
NUC1      13C
P1         9.00 usec
PL1        -0.90 dB
PL1W      42.02801895 W
SFO1      100.6479784 MHz

===== CHANNEL f2 =====
CPDPRG2   waltz16
NUC2       1H
PCPD2     90.00 usec
PL2        -2.00 dB
PL12       14.16 dB
PL13       17.90 dB
PL2W      11.86359406 W
PL12W     0.28722104 W
PL13W     0.12139934 W
SFO2      400.2216009 MHz
SI         32768
SF         100.6353990 MHz
WDW        EM
SSB         0
LB         1.00 Hz
GB         0
PC         1.40

```

<sup>13</sup>C NMR of 4-(p-tolyethynyl)benzaldehyde



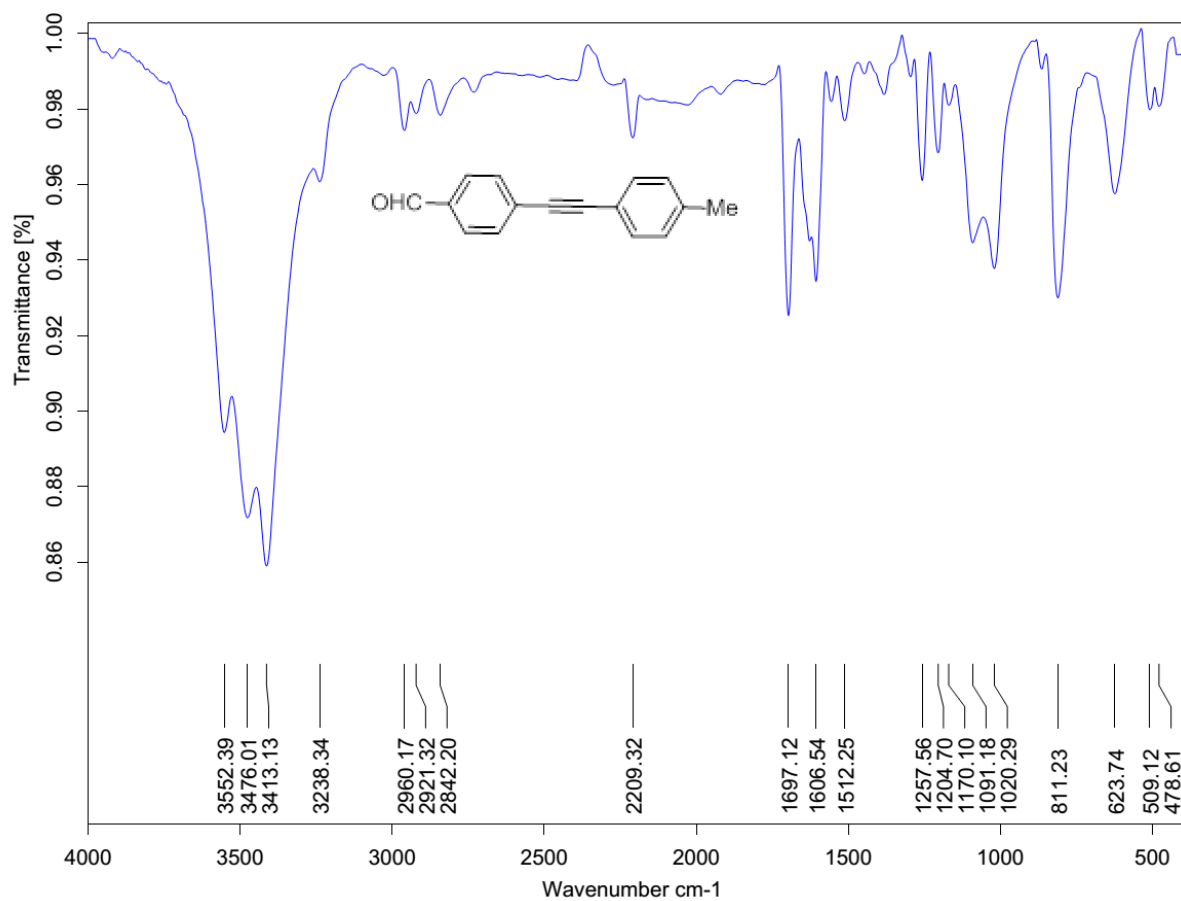

**FT-IR of 4-(p-tolyethynyl)benzaldehyde**

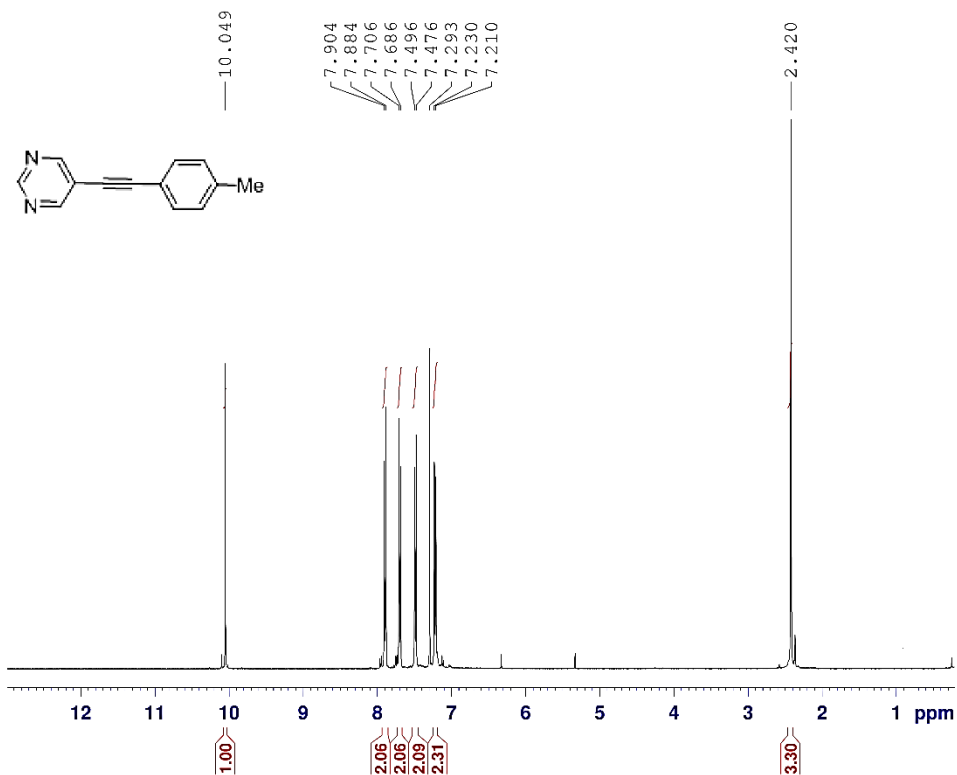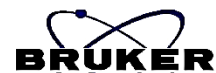

NAME Dr.Gholi nejad(hamed)  
 EXPNO 104  
 PROCNO 1  
 Date\_ 20150311  
 Time 11.17  
 INSTRUM spect  
 PROBHD 5 mm PABBO BB-  
 PULPROG zg30  
 TD 65536  
 SOLVENT CDCl3  
 NS 7  
 DS 0  
 SWH 8012.820 Hz  
 FIDRES 0.122266 Hz  
 AQ 4.0894966 sec  
 RG 287  
 DW 62.400 usec  
 DE 6.50 usec  
 TE 294.4 K  
 D1 6.0000000 sec  
 TDO 1

----- CHANNEL f1 -----  
 NUC1 1H  
 P1 14.00 usec  
 PLL -2.00 dB  
 PLW 11.86359406 W  
 SFO1 400.2236020 MHz  
 SI 32768  
 SF 400.2200000 MHz  
 WDW EM  
 SSB 0  
 LB 0.30 Hz  
 GB 0  
 PC 1.00

<sup>1</sup>H NMR of 5-(p-tolyethynyl)pyrimidine

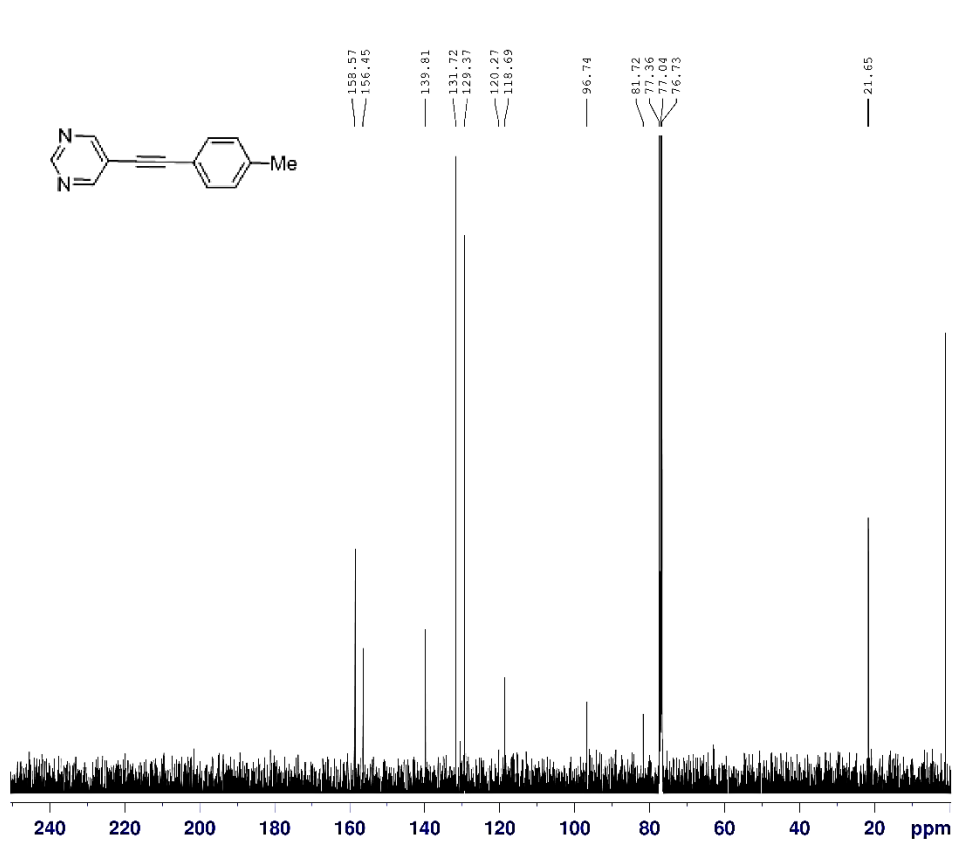

**BRUKER**

Dr. Gholi nejod (hamed)

```

NAME
EXPNO 103
PROCNO 1
Date_ 20150311
Time 10.50
INSTRUM spect
PROBHD 5 mm PABBO B3-
PULPROG zgpg30
TD 65536
SOLVENT CDCl3
NS 400
DS 0
SWH 25252.525 Hz
FIDRES 0.385323 Hz
AQ 1.2976629 sec
RG 2050
DW 19.800 usec
DE 6.50 usec
TE 294.7 K
D1 2.0000000 sec
D11 0.0300000 sec
TDO 1

===== CHANNEL f1 =====
NUC1 13C
P1 9.00 usec
DL1 -0.90 dB
PL1 42.02801895 W
SFO1 100.6479784 MHz

===== CHANNEL f2 =====
CPDPRG2 waltz16
NUC2 1H
PCPD2 90.00 usec
PL2 -2.00 dB
PL12 14.16 dB
PL13 17.90 dB
PL2W 11.86359406 W
PL12W 0.28722104 W
PL13W 0.12139934 W
SFO2 400.2216009 MHz
SI 32768
SF 100.6353990 MHz
WDW EM
SSE 0
LB 1.00 Hz
GB 0
PC 1.40

```

<sup>13</sup>C NMR of 5-(p-tolyethynyl)pyrimidine

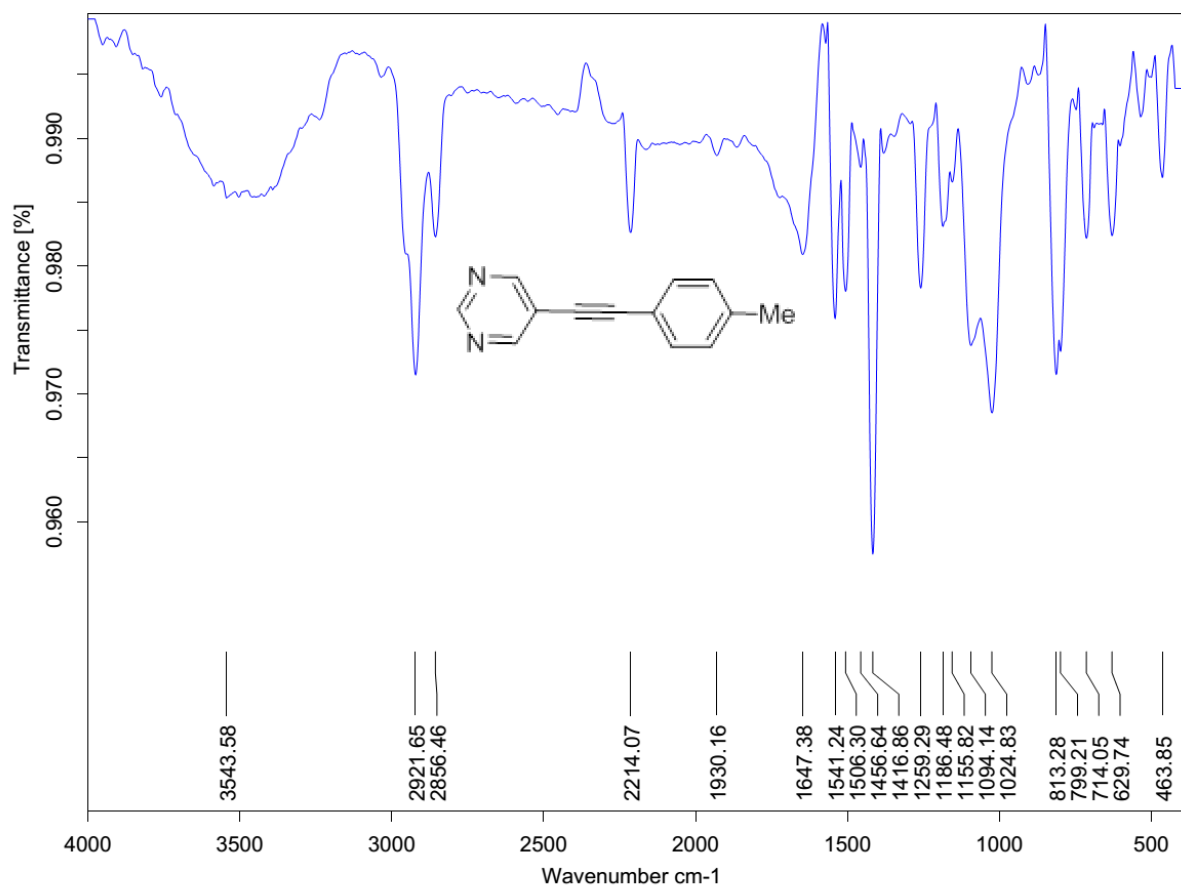

**FT-IR of 5-(p-tolylethynyl)pyrimidine**

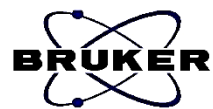

NAME Dr.Gholi nejad(hamed)  
EXPNO 106  
PROCNO 1  
Date\_ 20150408  
Time 15.33  
INSTRUM spect  
PROBHD 5 mm FAPBO B2-  
PULPROG zg30  
TD 65536  
SOLVENT CDCl3  
NS 12  
DS 0  
SRH 8012.820 Hz  
FIDRES 0.122266 Hz  
AQ 4.0894966 sec  
RG 287  
DW 62.400 usec  
DE 6.50 usec  
TE 295.1 K  
D1 6.00000000 sec  
TDO 1

----- CHANNEL f1 -----  
NUC1 1H  
P1 14.00 usec  
PL1 -2.00 dB  
PL1W 11.86359406 W  
SFO1 400.2236020 MHz  
SI 32768  
SF 400.2200000 MHz  
WDW EM  
SSB 0  
LB 0.30 Hz  
GB 0  
PC 1.00

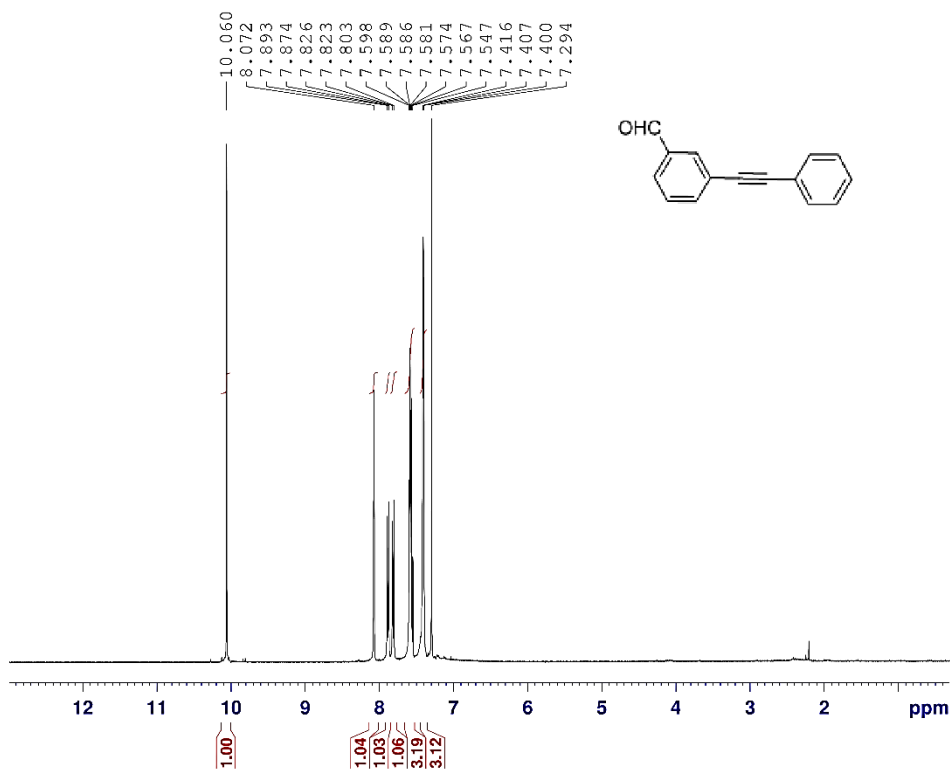

<sup>1</sup>H NMR of 3-(phenylethynyl)benzaldehyde

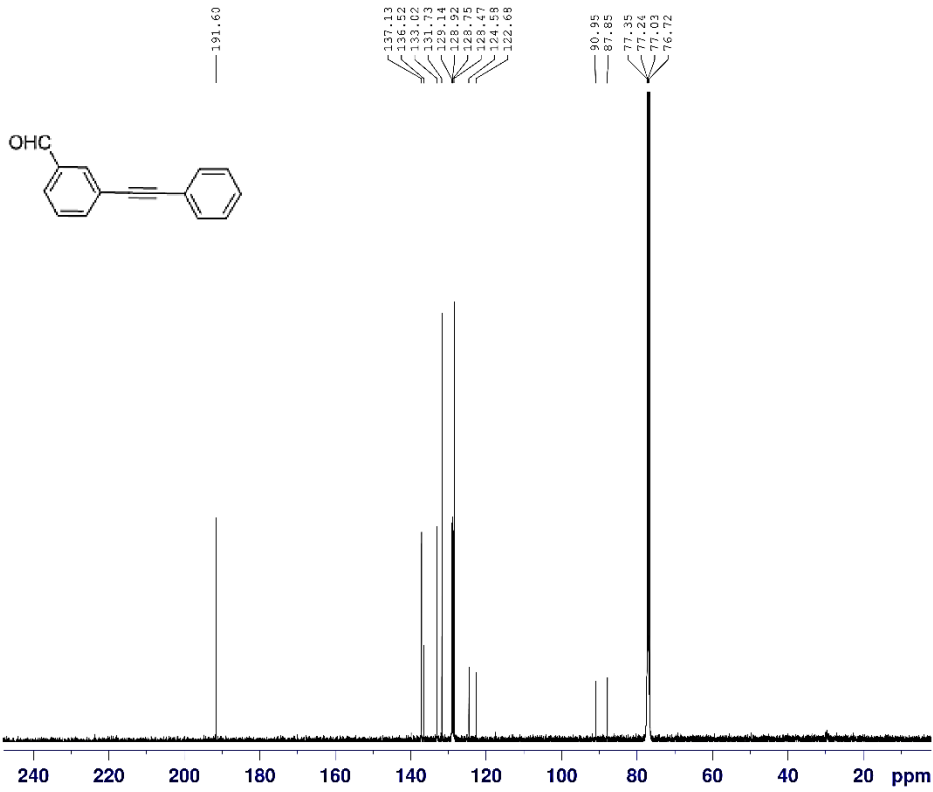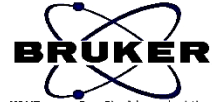

```

NAME      Dr.Gholi nejad (hamed)
EXPNO     1
PROCNO    1
Date_     20150411
Time      16.50
INSTRUM   spect
PROBHD    5 mm F4BBO BB-
PULPROG   zgpg30
TD         65536
SOLVENT   CDCl3
NS         8192
DS         0
SWH        25252.525 Hz
FIDRES     0.385323 Hz
AQ         1.2976629 sec
RG         2050
DW         19.800 usec
DE         6.50 usec
TE         297.2 K
D1         2.00000000 sec
D11        0.03000000 sec
TD0        1

===== CHANNEL f1 =====
NUC1      13C
P1         9.00 usec
PL1        -0.90 dB
PLLW       42.02801895 W
SFO1      100.6479784 MHz

===== CHANNEL f2 =====
CPDPRG2   waltz16
NUC2       1H
PCPD2     90.00 usec
PL2        -2.00 dB
PL12       14.16 dB
PL13       17.90 dB
PL2W       11.86359406 W
PL12W      0.28722104 W
PL13W      0.12139934 W
SFO2      400.2216009 MHz
SI         32768
SF         100.6353990 MHz
WDW        EM
SSB         0
LR         1.00 Hz
GB         0
PC         1.40

```

<sup>13</sup>C NMR of 3-(phenylethynyl)benzaldehyde

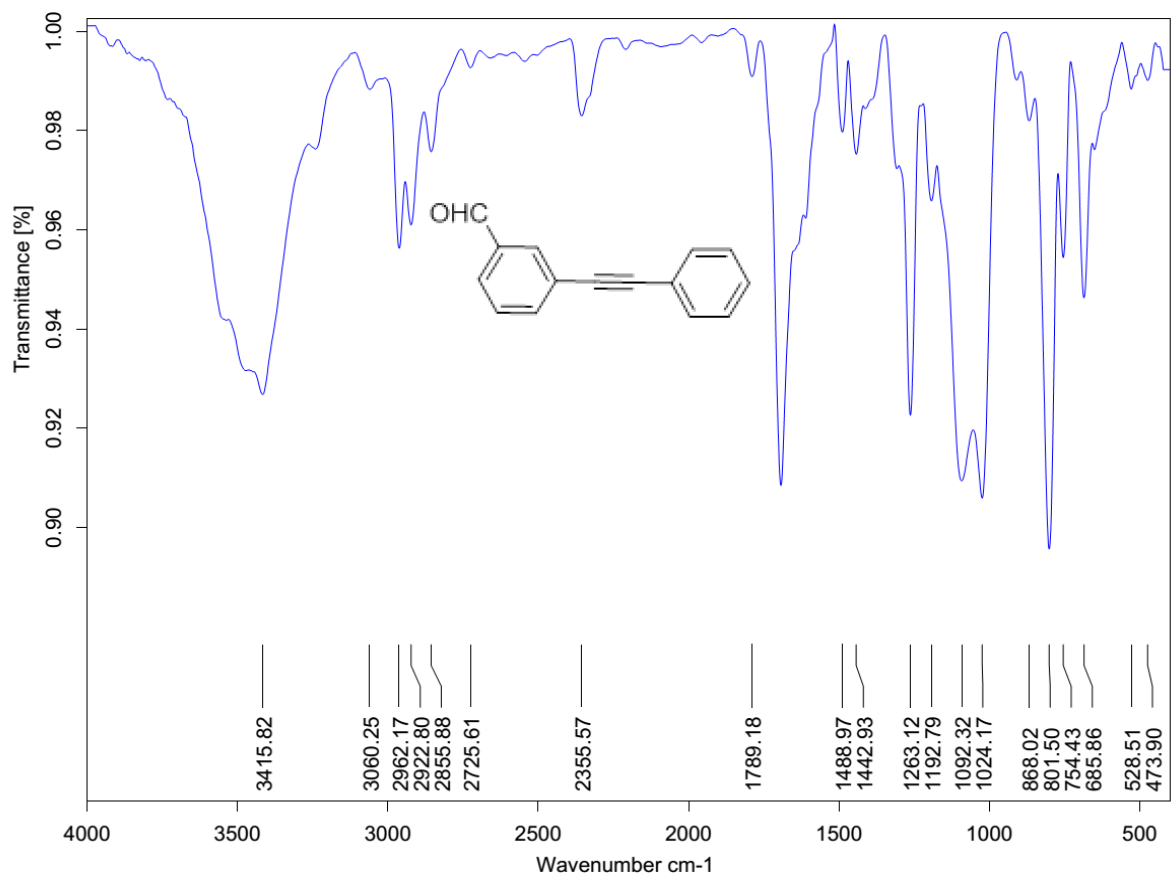

**FT-IR of 3-(phenylethynyl)benzaldehyde**
